# Supplementary material for: Transcriptomic and proteomic profiles of II YOU 838 (Oryza sativa) provide insights into heat stress tolerance in hybrid rice
Source: PeerJ. 2020 Feb 21;8:e8306. doi: 10.7717/peerj.8306 (PMC7039125; doi:10.7717/peerj.8306)
Supplement: Supplemental Information 5 [file peerj-08-8306-s005.xls]

## Sheet: 1542 overdominance DEGs
Table S2: The 1542 over-dominant differentially expressed genes in hybrid rice II8 flag leaves under long-term heat stress compared with the corresponding genes in its parents.
Gene ID	Fu Hui 838 (TPM)				II-32A (TPM)				II YOU 838 (TPM)
	0 h	24 h	72 h	120h	0 h	24 h	72 h	120h	0 h	24 h	72 h	120h
MH01g0011000	13.71	11.94	11.56	3.76	11.05	6.72	8.02	4.4	7.37	4.2	21.81	13.63
MH01g0012000	13.71	12.51	10.7	11.56	14.25	16.49	20.63	16.71	6.19	40.5	9.47	11.64
MH01g0016000	129.61	106.58	191.95	210.06	85.47	156	162.14	120.49	74.55	167.7	103.31	118.71
MH01g0019000	58.7	58.55	32.38	54.9	69.19	43.66	52.14	66.25	43.9	25.8	88.68	80.09
MH01g0038600	7.75	3.13	3.76	6.07	9.59	6.11	12.03	1.47	1.18	25.5	2.01	4.26
MH01g0040600	5.66	0	1.45	0.58	2.62	0	0	0.59	3.54	0.9	9.18	65.04
MH01g0040700	34.86	2.56	9.83	5.49	4.94	1.22	1.72	25.8	15.03	4.8	30.42	191.98
MH01g0044100	0.6	3.13	5.2	2.6	0.58	1.22	3.72	4.4	1.47	14.7	1.72	5.11
MH01g0046000	6.26	14.5	14.45	10.69	5.23	10.07	7.45	8.79	2.95	26.1	5.74	31.52
MH01g0046900	1.49	0.57	2.89	0.87	0	0	0	0.88	1.18	1.2	2.58	8.52
MH01g0049800	5.96	17.05	13.01	24.85	3.2	7.02	8.88	20.23	6.19	3.6	21.52	20.45
MH01g0054500	47.97	42.63	88.75	97.66	54.07	83.04	69.9	83.26	34.48	120.3	38.17	48.56
MH01g0054600	0.6	1.42	2.6	0	0.58	2.14	1.15	2.35	0	3.9	2.58	1.14
MH01g0056500	39.03	7.11	23.42	10.69	0	1.53	3.15	2.93	7.96	92.7	39.6	33.51
MH01g0058700	16.98	7.96	7.23	3.47	5.52	2.44	2.58	14.07	10.9	6	15.21	23.57
MH01g0063800	56.61	35.53	44.23	39.87	75.3	44.57	64.17	53.35	43.9	73.8	53.66	92.58
MH01g0073500	19.66	13.64	19.95	30.05	18.9	23.51	28.65	20.23	9.13	56.4	13.49	11.64
MH01g0080200	5.66	4.55	5.49	7.51	4.07	2.44	5.73	4.1	2.65	11.4	3.16	4.83
MH01g0081900	1.79	5.97	17.35	7.8	0	1.53	4.87	4.69	0	13.8	4.59	21.02
MH01g0085600	2.38	3.69	3.47	4.33	3.2	3.66	3.15	5.86	1.47	15	4.88	4.54
MH01g0086500	414.74	95.5	223.46	141.29	480.86	298.88	383.28	278.5	224.83	452.09	371.35	631.89
MH01g0086600	2.09	2.56	9.54	5.2	9.3	10.07	9.17	3.22	3.83	20.1	7.75	3.69
MH01g0088300	40.22	32.68	48.57	44.21	26.46	51.59	59.3	49.54	31.23	82.2	36.73	27.83
MH01g0090100	19.96	17.91	24.86	21.09	22.68	22.29	22.63	25.21	13.26	45.3	17.79	20.73
MH01g0090400	3.28	4.26	2.89	1.73	2.91	2.44	4.3	4.69	5.6	14.4	4.3	7.38
MH01g0091100	2.98	6.25	10.12	13.29	3.2	7.33	3.72	8.21	0	8.7	7.46	6.53
MH01g0091500	16.39	12.51	12.43	14.16	13.95	17.4	16.33	12.61	9.13	14.4	11.48	21.87
MH01g0095300	0.89	0	1.16	0	1.16	0	0	0.59	0	0.6	1.15	4.26
MH01g0110000	6.55	4.55	5.2	5.78	7.56	5.5	5.44	7.62	3.83	16.2	7.17	6.53
MH01g0111000	4.47	9.66	13.01	10.98	8.43	9.46	8.88	6.74	4.71	7.5	5.74	15.9
MH01g0113500	0.89	2.84	9.25	2.02	0	2.75	14.9	9.97	0.59	8.4	4.02	10.22
MH01g0115600	121.86	83.28	101.76	134.94	81.4	96.17	109.71	74.46	63.06	169.2	97.86	56.8
MH01g0120500	10.43	19.61	28.62	33.52	15.99	30.83	33.23	38.99	10.31	43.8	10.33	17.61
MH01g0120600	15.79	15.63	15.9	15.6	13.08	11.6	16.33	24.92	9.13	21	12.34	15.9
MH01g0121200	31.58	49.17	52.61	33.23	23.55	34.8	44.11	98.5	84.27	53.1	227	256.17
MH01g0123900	1.79	2.56	4.63	1.44	1.45	6.41	9.17	9.09	0	30.3	1.43	8.52
MH01g0135500	2.38	2.56	4.91	7.8	4.36	6.41	11.17	8.79	1.47	13.8	3.44	1.7
MH01g0143600	24.13	23.87	36.43	28.03	25.58	27.48	37.81	25.5	22.39	49.8	28.7	30.1
MH01g0145900	29.79	26.43	34.98	28.03	22.39	32.67	46.69	31.37	31.82	41.7	45.63	64.75
MH01g0150700	55.72	44.91	68.8	69.92	44.19	69	61.59	31.07	28.88	79.5	48.79	43.45
MH01g0154300	0.89	0	1.45	2.31	3.2	2.75	4.87	4.4	2.65	11.1	5.45	7.67
MH01g0157600	0.6	0.85	0.58	1.16	0	0.61	1.72	1.76	0	7.8	1.15	1.7
MH01g0163300	639.1	489.7	697.86	624.99	630	384.36	814.4	608.3	510.36	1040.68	597.48	662.28
MH01g0167000	19.66	28.14	38.16	32.07	22.68	35.72	54.14	37.52	23.57	67.5	24.68	26.13
MH01g0167300	0.6	0	0	0	0	0	0	0	0	2.7	2.87	6.25
MH01g0168500	5.66	13.64	8.67	9.82	4.65	3.36	4.58	10.55	4.71	4.2	13.49	13.63
MH01g0168900	0.6	0.57	2.89	1.16	2.33	0.61	0	0	0	4.5	1.43	1.14
MH01g0177600	3.28	5.68	8.67	8.38	0.87	6.11	8.88	7.92	2.65	9.6	5.45	10.51
MH01g0178800	9.53	1.71	3.76	3.76	13.37	3.36	9.17	2.64	2.06	16.2	1.72	8.52
MH01g0179000	23.24	25.01	23.42	26	20.06	31.44	39.24	37.82	16.5	54.9	20.95	28.68
MH01g0180100	44.1	50.59	68.51	60.1	52.33	54.34	66.17	94.4	41.25	72.9	52.23	104.23
MH01g0180700	23.24	27.28	31.8	25.72	15.12	21.68	22.92	17.3	11.49	30.6	17.51	17.04
MH01g0189900	1.79	1.14	4.63	2.31	3.2	7.33	8.02	4.69	0.59	14.4	1.43	3.69
MH01g0191700	45.29	32.4	56.37	42.19	41.28	57.7	77.92	30.78	26.81	155.4	29.85	54.81
MH01g0193200	8.64	6.54	6.07	10.11	9.3	18.93	30.94	36.06	5.3	45.6	9.18	19.31
MH01g0221400	6.55	13.64	22.55	14.74	10.76	10.07	9.17	17.59	8.25	8.1	12.63	21.3
MH01g0226500	0.6	1.14	2.31	3.18	0.58	1.53	2.01	2.05	0.59	12	1.43	2.27
MH01g0226600	0.6	0	0.87	1.44	0	1.22	0.86	0.88	0	23.4	0	0.57
MH01g0227000	3.87	5.12	24.28	2.6	1.45	2.75	4.3	21.11	3.54	15.9	5.45	6.25
MH01g0240200	2.68	4.83	1.73	2.31	0	2.75	8.88	4.69	1.18	7.5	0.57	0.57
MH01g0245100	8.34	11.08	6.65	9.25	2.33	7.02	12.89	4.69	4.42	12.9	5.45	8.52
MH01g0251400	1.49	3.41	3.76	4.05	4.65	7.63	6.3	5.86	0.59	8.4	2.3	3.12
MH01g0262000	26.22	31.55	66.49	80.62	48.55	54.04	73.62	69.19	36.24	79.8	27.55	39.76
MH01g0276800	4.77	3.69	26.89	9.54	2.04	1.53	4.01	3.52	5.01	5.1	14.06	22.15
MH01g0288000	55.72	67.64	169.41	141.58	101.46	110.51	143.52	122.83	44.49	215.7	80.93	96.28
MH01g0293000	17.88	16.2	32.09	23.12	31.11	39.08	39.82	23.45	12.67	48.9	33.86	32.38
MH01g0301100	4.47	7.39	6.65	3.76	7.27	7.63	4.58	4.1	2.65	16.5	4.88	8.52
MH01g0304200	0	0.57	1.45	0.58	0	0	0	0	0	0	1.15	6.82
MH01g0307300	9.83	15.06	13.88	15.6	10.47	19.84	20.05	17	9.13	20.1	8.9	9.66
MH01g0322900	1.19	0.57	3.47	2.31	0.87	0.61	2.58	0	0	9	0.57	1.14
MH01g0323300	0.89	2.27	0.87	0	0	0.61	4.87	4.98	0	19.2	0.57	0
MH01g0328200	0	1.99	5.2	3.76	3.2	1.53	5.44	2.64	0	15	1.15	2.27
MH01g0341700	216.01	171.67	232.72	222.2	196.53	132.5	169.01	115.8	182.4	126.9	407.51	245.37
MH01g0346700	10.13	13.93	15.9	18.2	18.61	24.12	23.49	11.73	12.08	26.4	11.19	15.9
MH01g0358000	9.83	14.78	29.2	33.52	15.12	29.92	45.83	16.12	13.85	40.5	17.22	21.02
MH01g0359500	17.88	19.61	21.68	14.16	9.59	17.1	17.47	4.69	5.01	25.2	8.61	5.96
MH01g0364100	4.47	4.83	4.34	7.51	5.52	4.88	9.45	7.04	2.95	10.5	3.16	5.11
MH01g0364800	11.32	16.77	16.19	13.58	18.9	26.87	28.36	17.88	10.31	33.3	12.34	24.42
MH01g0365400	0	2.27	11.27	7.8	0	3.05	11.46	12.02	0	6.9	7.17	12.78
MH01g0370700	0	1.42	3.47	0.87	1.74	1.83	0	9.38	0	3.6	0	1.14
MH01g0382100	23.84	33.82	27.17	51.72	24.71	38.47	34.09	33.42	14.73	66.6	25.83	22.44
MH01g0385100	9.24	15.92	22.26	22.54	14.54	14.65	26.93	14.07	10.31	24	10.62	11.36
MH01g0389800	0	0	0	0	0	0	0	0	0	0.6	0.57	7.67
MH01g0418600	12.81	16.48	24.57	20.8	18.61	26.25	28.07	26.97	10.31	36.6	10.91	12.5
MH01g0421900	38.44	21.88	40.76	34.96	47.1	58	71.04	31.37	30.06	155.1	24.11	52.82
MH01g0428100	5.96	11.65	13.01	6.07	3.78	11.6	5.44	7.92	3.54	13.8	8.9	10.51
MH01g0445100	7.15	5.68	6.07	1.73	4.94	4.58	5.73	0.59	7.37	53.4	7.46	3.12
MH01g0445400	0	1.14	8.96	3.76	0.87	1.53	4.01	7.04	0	9.3	9.76	23.57
MH01g0448100	0.89	0	1.45	0	0	0	0.57	1.47	0	1.5	2.01	3.98
MH01g0448400	11.02	15.35	19.37	23.69	9.3	18.62	23.2	20.52	14.73	31.8	11.48	12.5
MH01g0456700	9.53	12.22	15.9	19.65	6.11	13.43	26.07	13.49	7.66	28.5	9.47	6.82
MH01g0458600	0	1.14	0	1.16	0.58	0	1.43	0.59	0	14.7	0	0
MH01g0459800	0	3.13	2.31	1.73	0.58	2.14	1.43	1.47	0.88	6.6	0.57	1.42
MH01g0461100	13.71	49.45	8.38	36.98	25.29	143.79	49.56	51.6	25.93	1.5	63.42	49.7
MH01g0462100	0	0	0.58	0	0.58	0	0	1.76	0	0	0	5.4
MH01g0474600	5.96	7.96	6.94	6.36	1.45	0.92	6.88	10.26	1.47	12	5.74	11.36
MH01g0483600	53.33	52.3	61	44.5	21.22	81.82	81.93	40.46	25.34	63.9	44.48	57.94
MH01g0488800	1.19	3.13	6.07	4.33	2.04	4.58	5.73	3.22	0	12	2.01	1.99
MH01g0492100	2.68	3.41	5.49	6.36	4.36	4.88	3.72	7.33	3.54	0	8.61	14.2
MH01g0493000	339.36	337.36	337.08	408.86	306.13	225.91	247.79	266.48	174.74	175.5	365.61	379.7
MH01g0497500	0	0	0	0	0	0	0	1.17	0	5.1	0	0
MH01g0504900	7.15	8.53	6.94	7.8	4.36	8.85	12.03	16.12	9.72	22.2	6.31	6.53
MH01g0511500	65.25	50.59	53.77	59.81	70.94	54.95	57.86	39.87	33.3	90	33	40.04
MH01g0516400	0	0	4.05	3.47	0.58	1.53	0	12.9	0	9.9	1.15	2.84
MH01g0516600	129.91	101.75	195.42	255.72	146.53	178.59	185.05	87.95	114.62	170.1	234.46	174.09
MH01g0521400	16.69	20.18	15.61	12.71	11.63	14.65	11.46	10.26	8.25	8.4	14.92	22.72
MH01g0522500	15.49	7.67	23.13	39.3	6.98	14.04	11.74	8.21	6.78	28.8	5.45	8.24
MH01g0523600	12.81	3.13	2.02	6.93	1.74	3.36	4.01	2.64	1.77	16.2	2.87	2.27
MH01g0524300	10.43	9.09	6.94	5.49	3.49	9.77	5.16	5.57	3.54	20.4	8.04	9.94
MH01g0526400	2.38	5.12	6.65	9.25	3.78	6.72	8.31	6.74	3.24	11.4	4.02	6.25
MH01g0526500	7.15	5.4	5.78	10.4	4.36	6.41	10.6	9.97	4.42	10.2	8.32	16.19
MH01g0528900	106.96	190.71	180.1	182.03	133.73	161.5	171.02	141.89	97.24	142.8	212.65	219.53
MH01g0530300	10.73	26.15	26.31	19.07	22.97	29	30.08	27.26	16.21	15.9	37.02	36.92
MH01g0531000	2.38	6.82	11.85	6.36	1.16	3.05	8.02	4.98	4.42	2.7	4.88	12.78
MH01g0532700	7.15	8.81	37.29	21.38	17.44	16.79	21.2	10.85	10.61	24	12.63	5.68
MH01g0533200	1.49	7.96	4.05	2.6	2.62	7.94	6.02	9.09	0.88	3.9	4.3	9.94
MH01g0533800	39.63	42.35	60.13	33.81	41.28	38.47	67.32	74.17	39.48	104.1	39.6	90.31
MH01g0536200	2.68	5.12	5.2	5.2	3.49	4.27	5.16	6.74	1.18	2.7	3.73	7.67
MH01g0540100	33.97	28.14	44.81	48.83	30.53	47.01	88.23	40.75	14.14	149.1	18.94	39.48
MH01g0540500	0	3.13	3.76	2.6	1.16	4.27	10.6	24.04	0.59	32.1	2.87	6.25
MH01g0542900	3.28	5.68	10.99	31.21	8.43	14.35	25.49	15.24	5.89	16.2	31.85	26.7
MH01g0546600	0	3.69	4.91	0.58	0	0.61	2.01	1.17	0	12.3	0.86	1.7
MH01g0546900	0.89	1.14	5.2	0	0	0	0	1.76	0.59	9	0	0
MH01g0561500	23.24	19.61	25.15	25.72	15.12	27.48	28.93	26.09	18.27	61.2	13.77	19.31
MH01g0563200	0	1.42	3.76	0.58	3.78	2.14	3.44	13.19	0.59	5.7	7.75	17.32
MH01g0567000	46.48	54.57	140.79	37.85	33.14	49.76	49.56	96.16	39.78	90.6	38.74	46.29
MH01g0573800	28.31	41.78	56.37	33.52	29.07	38.16	44.4	48.08	54.22	118.8	53.66	66.46
MH01g0575100	5.07	6.54	2.31	2.31	1.45	2.44	1.15	2.05	0.88	7.8	1.43	0.85
MH01g0575300	5.07	9.66	29.2	23.12	4.07	10.69	8.02	7.33	1.77	28.2	7.17	7.95
MH01g0578600	0	0	0.87	0	1.45	0	0.86	6.45	0	1.5	0	5.4
MH01g0581100	0.6	1.14	3.47	2.31	1.16	1.22	9.45	17	0	9.9	4.59	15.34
MH01g0581500	38.14	11.08	8.96	3.18	32.56	5.19	0	0.59	7.66	18.9	10.91	18.46
MH01g0583800	2.68	0.85	15.9	9.82	2.33	9.16	14.61	17	0.88	69.3	3.73	5.68
MH01g0584200	52.14	66.79	71.98	84.66	41.86	65.03	65.6	92.05	41.25	86.7	103.89	134.9
MH01g0584400	0	0.57	0	1.44	0.58	0.92	0	2.35	0.59	6.9	1.43	1.99
MH01g0588800	6.26	6.82	14.45	31.49	13.95	26.25	36.67	27.26	9.72	90.3	7.75	4.26
MH01g0589100	0	0	2.89	3.47	0	0.92	1.72	11.14	0	19.2	0.57	4.83
MH01g0592900	0	0.57	1.45	3.18	5.52	5.5	7.73	4.69	1.77	8.1	2.01	0
MH01g0594800	0	3.13	1.45	1.73	2.91	9.46	18.33	17	4.71	15.3	6.03	9.09
MH01g0596100	16.69	14.78	6.65	12.14	9.59	7.94	15.47	23.16	10.02	21.9	12.91	11.36
MH01g0598000	3.87	3.98	8.67	5.49	1.74	4.27	6.3	5.28	2.06	7.8	2.3	8.8
MH01g0599100	1.19	3.98	2.31	3.47	10.47	21.06	13.75	24.04	6.48	23.7	9.18	10.51
MH01g0599300	15.79	16.48	23.13	16.18	11.63	21.68	24.92	26.68	8.84	30.3	15.78	17.61
MH01g0599900	7.75	5.97	9.25	5.78	31.4	30.22	27.5	24.33	19.74	22.5	21.52	42.6
MH01g0605800	0.6	1.71	2.02	3.76	0.58	2.14	2.29	3.81	0	0.6	4.02	2.56
MH01g0607100	8.94	4.55	2.89	6.65	4.94	26.56	16.04	7.62	0.59	2.1	4.02	228.62
MH01g0609000	1.19	2.56	2.31	2.6	0.58	0.92	1.43	1.76	0	0	0.57	3.98
MH01g0610400	8.34	17.62	11.27	5.78	8.14	19.54	16.04	34.59	17.09	29.1	39.03	32.94
MH01g0625400	19.07	18.76	23.13	15.89	7.27	10.38	9.17	17.88	7.07	30.3	14.92	21.87
MH01g0631400	33.97	51.73	60.71	79.46	63.67	59.23	71.9	73.58	35.65	78.9	53.09	53.39
MH01g0632200	14	11.65	6.36	9.25	9.88	4.58	5.73	9.67	3.54	8.1	10.91	11.64
MH01g0632800	8.04	4.83	12.14	9.82	6.11	13.13	15.76	11.14	5.6	15.3	6.03	11.64
MH01g0638600	0	0	1.16	0	0	0	0	1.76	0.59	0.6	0.57	5.68
MH01g0649200	5.36	6.25	9.25	7.51	5.52	7.02	6.59	11.43	3.54	9.6	6.31	13.06
MH01g0649800	26.52	28.99	38.16	46.23	31.69	49.76	49.27	42.51	24.16	61.2	27.26	32.94
MH01g0653200	0.6	1.14	3.18	2.89	1.16	3.05	4.58	5.57	0	3.6	2.01	1.99
MH01g0662800	9.53	15.06	19.37	27.45	13.37	23.2	41.82	25.8	13.85	46.8	12.63	16.47
MH01g0663900	5.07	1.71	8.38	7.51	3.2	5.8	8.88	20.52	4.71	51	5.74	8.52
MH01g0665600	3.58	5.97	8.09	8.67	2.33	7.02	6.88	3.22	0.88	11.4	4.88	0
MH01g0671400	2.09	4.83	2.02	1.16	6.69	0.92	2.86	2.35	3.54	0	7.75	14.77
MH01g0672600	6.85	7.96	10.7	13.29	13.08	12.52	18.33	12.9	4.71	24	10.91	10.22
MH01g0674100	0	1.71	4.05	3.18	3.78	5.5	3.44	8.21	3.83	9	5.45	12.21
MH01g0674200	5.07	4.83	5.49	6.36	8.14	19.84	12.89	15.54	2.95	21.3	8.61	15.62
MH01g0674500	11.62	15.35	43.07	21.09	14.54	28.7	36.67	24.33	10.31	57.6	20.38	15.34
MH01g0675000	7.15	4.55	13.01	10.4	14.83	28.7	19.19	4.1	8.55	37.8	11.77	32.66
MH01g0677800	0	0.85	2.02	0	0	0	5.44	6.16	0.59	6.3	1.15	2.84
MH01g0680900	19.37	30.41	14.74	24.27	11.05	30.53	21.77	35.47	6.48	41.4	19.51	17.89
MH01g0683400	66.74	29.27	32.09	29.18	37.21	22.29	28.07	23.16	20.92	67.8	15.5	17.04
MH01g0684800	0	0.85	10.99	1.73	0	0	1.43	14.66	0	12.6	3.44	9.66
MH01g0689400	0	0.85	1.16	1.16	0.58	0	2.58	1.17	1.18	3.9	1.43	7.95
MH01g0689500	0.6	3.98	2.31	1.73	0.58	3.97	13.46	5.28	0.59	12.9	2.3	8.52
MH01g0690000	7.75	3.13	4.05	10.69	31.98	15.26	10.89	0	4.13	16.5	1.43	3.69
MH01g0690700	14	9.38	13.01	16.18	13.95	14.04	17.47	10.85	6.78	19.2	13.49	20.16
MH01g0693500	5.07	0.57	12.72	15.6	3.49	3.66	12.6	26.09	5.01	15.3	10.04	5.68
MH01g0696500	4.17	4.55	6.07	6.65	6.98	5.19	8.31	7.04	1.77	8.4	3.73	2.56
MH01g0702700	24.43	18.19	27.17	31.21	37.21	13.74	15.47	16.12	16.5	24	20.09	38.34
MH01g0703300	0.6	0	0.87	2.31	0.87	0	2.29	1.17	0	2.1	2.01	4.26
MH01g0704500	0	0	2.02	3.18	1.16	1.53	4.87	1.17	0	19.2	0.57	0
MH01g0704800	0	1.42	8.38	1.44	0.58	5.19	3.44	3.22	0	10.8	0	5.68
MH01g0724000	8.64	10.52	19.08	19.07	9.59	20.15	26.64	32.25	5.3	26.7	6.6	5.4
MH01g0725100	39.03	20.75	37	36.7	32.85	31.44	36.09	24.33	18.27	54.3	21.81	28.4
MH01g0726000	5.96	3.13	4.63	4.33	6.4	8.24	9.74	13.19	2.06	10.5	9.76	17.89
MH01g0728100	23.24	17.05	37.58	42.47	30.53	29	38.39	28.73	17.09	60	21.81	26.13
MH01g0729500	0.6	3.41	6.36	4.62	3.49	7.94	9.45	10.26	1.47	13.5	6.03	4.54
MH01g0731300	6.85	4.55	18.5	19.07	11.34	18.32	18.62	17.88	10.02	21.3	7.75	11.36
MH01g0732800	1.19	1.71	1.45	0.58	1.45	1.22	1.72	2.93	0.88	3.3	0.57	7.1
MH01g0741700	222.87	194.12	244.28	281.43	298.28	298.88	405.05	378.17	209.8	491.39	212.08	370.05
MH01g0742300	24.13	28.14	38.16	36.98	24.13	31.14	41.82	37.82	17.39	37.8	33.58	26.98
MH01g0746100	11.02	22.17	21.1	19.07	1.45	3.36	4.58	7.04	7.66	11.4	22.67	19.31
MH01g0746200	3.28	5.68	4.34	9.54	2.62	7.94	13.46	11.14	2.65	10.8	6.31	12.21
MH01g0746900	2.98	6.82	13.88	11.27	4.07	7.63	9.74	9.67	3.54	12	6.31	5.4
MH01g0749800	21.75	15.35	38.45	27.16	24.71	31.44	29.79	15.24	13.85	35.4	21.24	20.16
MH01g0752200	3.87	1.99	2.89	2.89	4.94	7.02	8.02	4.69	1.47	15.3	2.58	3.12
MH01g0753800	2.98	6.54	1.45	0.58	0	0	0	1.47	2.65	0.6	7.75	35.22
MH01g0757400	16.39	15.63	20.53	10.69	15.12	23.2	20.91	17	18.27	5.4	32.14	40.33
MH01g0758400	160	50.02	56.37	55.48	137.22	38.47	43.26	105.54	146.15	61.8	138.61	523.41
MH01g0758800	7.15	5.4	4.34	4.33	6.69	7.94	8.31	3.81	3.24	15.9	3.16	7.95
MH01g0761900	7.45	11.08	22.55	17.34	12.21	16.18	23.2	13.19	7.96	24.9	16.07	7.95
MH01g0762700	10.13	14.5	19.37	13.29	9.01	15.26	15.76	12.31	2.95	18.9	13.77	12.21
MH01g0775300	14.9	22.17	36.71	25.43	15.7	25.03	28.07	27.85	9.43	27.9	26.69	28.97
MH01g0776000	226.74	270.86	205.25	140.43	105.24	170.05	196.51	299.9	138.2	365.39	181.66	238.27
MH01g0776200	8.34	7.96	7.81	5.78	2.33	7.02	7.45	14.36	12.38	43.5	17.79	16.19
MH01g0780000	3.87	1.99	4.91	5.78	7.85	5.5	8.02	10.26	4.42	23.4	6.89	9.94
MH01g0780400	6.85	9.38	17.92	16.76	6.11	15.26	19.19	10.26	5.89	18.6	8.9	11.64
MH01g0783000	21.15	20.46	37	34.67	20.64	40.6	56.15	33.13	27.99	137.1	25.54	40.33
MH01g0784300	14	20.75	25.44	16.18	22.39	8.85	9.74	25.5	19.74	5.7	110.2	59.64
MH01g0785700	1.79	5.97	3.18	3.18	1.16	0	0	4.1	0.59	10.5	2.58	2.56
MH01g0785800	3.58	3.13	17.35	9.25	6.4	5.8	11.17	8.79	1.18	17.1	3.44	4.83
MH01g0786000	3.58	6.25	7.81	9.82	11.05	8.55	10.6	6.45	2.95	6.9	10.62	7.1
MH01g0791000	0	3.41	3.18	1.44	0.87	0	4.87	31.66	0	3.3	9.76	17.61
MH01g0792200	5.96	4.55	3.47	4.05	14.54	3.66	8.88	16.71	10.9	2.7	28.41	33.23
MH01g0799000	5.07	9.95	13.01	13	12.21	21.68	24.06	11.73	9.13	28.2	6.03	9.66
MH01g0800100	0	0.57	19.95	6.93	5.23	4.58	10.03	53.35	0	4.8	5.74	36.35
MH01g0801000	4.77	4.83	6.65	2.31	5.23	9.16	7.45	7.92	4.42	18	2.87	11.64
MH01g0804600	38.73	38.37	29.2	21.09	18.02	21.37	26.35	20.52	17.68	34.8	20.09	36.07
MH01g0804700	0	1.99	3.76	4.05	0.58	3.36	2.86	1.47	0	8.4	0.86	1.14
MH01g0805100	0	0	1.45	0	1.74	3.97	0	0.88	7.37	21.3	31.85	11.64
MH01g0808400	24.73	23.87	45.1	35.25	30.24	40.91	42.11	19.64	25.64	51.3	31.57	28.68
MH01g0811200	42.61	57.7	81.23	70.21	50	66.86	71.61	37.52	41.55	106.8	47.35	42.32
MH01g0814200	33.97	51.16	60.42	60.39	30.53	54.95	54.71	40.75	30.35	80.7	59.98	57.94
MH01g0815200	2.98	2.27	6.36	7.8	2.04	6.11	8.02	2.64	1.77	13.5	3.44	2.56
MH01g0815300	0	0	0	0	0	2.14	1.72	0	0	5.1	0	0
MH01g0817300	7.15	11.94	18.79	17.34	14.25	10.69	8.59	7.92	5.01	15.3	10.33	3.69
MH01g0818700	0	2.84	1.73	1.73	6.98	9.46	9.17	7.92	2.65	9.6	6.03	1.7
MH02g0011900	0	0.85	1.16	0.58	1.16	3.05	2.01	2.93	0	4.2	0.57	0.57
MH02g0014100	7.45	1.71	6.94	4.62	4.07	3.97	11.17	6.74	4.71	12.6	6.89	18.18
MH02g0014200	19.96	21.32	10.12	7.8	5.81	4.27	3.15	14.07	8.55	3.3	13.2	20.45
MH02g0018900	36.95	31.26	50.01	39.01	22.97	43.35	48.41	28.73	22.39	57.6	25.25	20.16
MH02g0021300	6.55	9.09	6.94	2.89	3.49	3.97	1.72	20.52	2.95	3	12.34	11.93
MH02g0022800	312.55	344.47	227.51	210.35	158.15	293.69	371.82	699.48	94	818.98	160.99	286.84
MH02g0023900	9.24	29.27	10.41	8.67	13.95	33.28	26.93	66.55	2.36	41.7	12.34	18.46
MH02g0024400	6.55	7.67	11.56	13	7.56	13.43	14.04	9.67	4.13	11.4	6.89	13.92
MH02g0026100	2.09	0.85	1.16	0	0.58	0	0.57	1.76	0	3.6	2.58	15.9
MH02g0028100	0	0	1.45	0	1.74	4.27	3.72	1.76	0	1.2	2.58	4.26
MH02g0033100	32.48	30.41	54.06	47.39	23.84	44.88	49.56	58.05	26.23	76.5	33.58	45.72
MH02g0037300	51.55	23.02	61	44.5	32.27	37.55	62.45	36.06	18.56	145.8	43.33	50.84
MH02g0037800	0.6	0.85	0.58	1.44	1.45	3.66	3.44	1.76	0	1.5	2.3	3.98
MH02g0038300	0.6	2.84	2.6	1.44	0	3.66	4.01	0.59	0	7.8	0.57	0.57
MH02g0039000	12.22	19.33	20.81	19.65	11.92	14.35	16.9	20.81	15.91	34.2	10.33	12.5
MH02g0042200	0.89	3.13	8.09	3.47	2.33	2.75	4.87	4.4	0.59	8.1	4.59	11.08
MH02g0043500	0	3.69	0	0	1.16	2.44	0	1.17	0.88	5.4	3.44	8.52
MH02g0048500	0	0	0	0	20.93	15.26	12.32	3.22	3.24	11.1	3.73	3.41
MH02g0050600	6.26	6.82	13.88	10.4	2.62	7.02	10.03	9.09	2.06	15.3	6.6	5.4
MH02g0053400	3.87	3.13	5.49	3.76	1.45	1.53	0	0.88	0	5.4	0.86	1.7
MH02g0071100	21.75	32.4	46.25	43.34	38.96	42.74	42.97	19.35	32.12	73.8	28.12	38.34
MH02g0075100	10.13	14.5	15.61	12.14	5.81	13.74	15.76	23.75	6.19	33	13.77	7.95
MH02g0077700	2.09	3.41	2.31	2.6	4.36	5.19	10.31	9.38	2.36	13.8	2.87	5.11
MH02g0078500	0.89	2.56	1.73	2.02	0	0.61	1.72	2.05	0.88	12.3	1.43	0.85
MH02g0079200	12.51	8.24	22.55	11.27	29.36	15.57	25.21	7.62	7.37	42.6	26.4	31.24
MH02g0081300	10.43	4.26	6.94	2.31	12.21	13.13	22.63	27.56	11.49	103.5	14.35	9.37
MH02g0082200	0.89	2.27	3.47	1.73	0	2.44	3.72	1.17	0	3.6	0.86	2.27
MH02g0083100	1.79	6.54	8.38	6.93	0	1.83	2.29	4.1	0	4.8	1.43	8.24
MH02g0083900	2.98	5.68	4.05	8.09	2.91	4.88	5.44	2.35	2.65	10.5	2.58	3.98
MH02g0084000	0	1.14	5.2	0.87	0	0.92	0.57	1.17	0	11.4	0.86	0.57
MH02g0084900	5.66	7.11	17.92	9.82	6.98	9.16	24.64	22.57	5.89	18.9	9.76	9.09
MH02g0090700	2.68	1.99	2.02	0.87	1.45	2.44	3.44	17.88	4.13	24.9	5.45	3.41
MH02g0090800	128.71	84.13	103.2	126.85	191.01	141.65	143.52	114.33	66.89	185.1	102.74	113.88
MH02g0094700	40.52	167.69	75.74	163.25	77.91	94.64	84.51	123.13	75.73	71.4	171.9	119.85
MH02g0094900	2.68	2.56	3.47	4.33	2.62	0.92	2.58	2.64	1.18	6.3	1.15	7.1
MH02g0095100	7.15	7.96	5.78	4.05	2.91	5.5	8.88	23.75	2.36	21	4.88	11.93
MH02g0097600	5.66	9.95	8.09	13.87	4.94	7.33	15.76	13.19	3.24	23.4	5.45	10.22
MH02g0101600	15.79	16.77	19.95	20.8	11.63	18.62	22.92	22.28	15.03	33	12.91	17.04
MH02g0101700	6.26	3.13	5.49	4.05	3.78	3.97	4.58	2.35	2.36	11.4	2.87	2.84
MH02g0102100	2.09	1.14	0.87	2.89	0	2.14	3.44	0.59	0.59	7.8	1.43	2.27
MH02g0102200	8.04	5.68	13.88	10.69	8.72	9.77	9.17	7.33	3.24	11.1	8.04	9.94
MH02g0103300	78.96	39.22	77.19	84.95	95.07	77.54	76.2	34.89	53.04	114	39.03	42.32
MH02g0103600	22.35	16.48	23.13	13.87	8.14	12.82	34.66	40.75	14.44	54.6	15.5	24.99
MH02g0105400	21.45	7.39	11.56	10.4	16.28	5.19	10.31	7.33	6.19	28.2	9.47	24.14
MH02g0106100	4.47	2.84	6.07	4.05	4.65	4.88	8.31	3.81	0.59	12.6	2.58	4.54
MH02g0107600	0.6	1.99	0.87	2.31	1.45	2.14	5.73	3.22	0.88	9.9	2.01	2.56
MH02g0109600	395.38	145.52	326.67	323.62	273.86	347.72	329.71	115.5	221.29	443.09	178.21	147.39
MH02g0110200	16.98	16.48	16.19	15.03	7.27	16.79	27.21	6.74	12.97	44.4	5.17	7.38
MH02g0110800	7.15	9.09	17.63	15.03	4.07	7.94	4.58	8.5	3.24	19.2	6.89	7.38
MH02g0125000	5.96	5.4	9.25	4.91	1.74	6.41	4.01	6.16	1.77	40.2	3.73	4.26
MH02g0161000	31.88	32.4	68.22	62.12	33.72	30.22	35.23	36.06	25.34	90	35.01	55.66
MH02g0162800	0	0	0	0	0.58	0.61	0	0	0	5.1	0	0.57
MH02g0168000	3.28	3.13	2.02	0	4.65	6.11	9.45	7.04	2.06	8.4	2.87	2.56
MH02g0172300	8.94	2.56	8.67	10.11	12.21	7.02	9.74	5.28	1.47	15.3	4.59	9.37
MH02g0174000	11.02	16.2	13.59	13.87	13.08	14.96	21.2	15.24	13.55	47.7	7.17	15.34
MH02g0174800	20.56	13.07	19.37	17.91	11.63	13.13	19.19	12.9	10.9	23.4	18.37	12.21
MH02g0176100	53.33	44.91	72.56	66.46	50.88	57.39	66.74	78.57	40.07	91.8	41.04	60.78
MH02g0180700	27.71	25.86	48.86	32.07	13.66	19.84	21.2	23.75	37.13	109.2	19.8	82.08
MH02g0196600	0.89	0	0	0.87	3.2	2.44	4.3	6.16	0	5.4	2.01	3.41
MH02g0202000	31.28	29.56	38.16	37.85	27.04	29.61	50.99	28.73	27.99	62.7	23.82	26.41
MH02g0202200	0	2.27	9.54	2.6	0.58	2.14	6.3	5.28	1.77	8.4	11.19	12.21
MH02g0204100	7.15	4.26	12.72	16.47	8.43	8.85	16.33	14.36	4.71	24.9	3.73	16.47
MH02g0215600	3.28	5.97	11.56	8.96	5.23	9.77	6.88	2.93	5.3	19.2	6.6	7.1
MH02g0220200	10.73	16.2	21.68	13	9.3	20.15	21.48	24.04	11.79	27	11.77	16.47
MH02g0221800	28.31	34.39	52.61	43.34	28.2	31.44	36.67	51.89	23.57	37.2	25.83	47.43
MH02g0230800	4.77	5.4	9.25	6.36	4.65	7.63	5.73	9.38	8.25	20.7	7.17	8.52
MH02g0233800	13.11	0	0	0	0	0	0	0	0	4.8	0	0
MH02g0237500	28.9	12.22	28.91	15.6	20.35	28.7	21.48	17.59	9.13	43.5	11.48	18.18
MH02g0265800	2.68	0	0.87	0	0.58	0.61	1.15	0.88	1.47	8.4	0.57	2.56
MH02g0276900	1.49	1.99	6.36	1.16	1.45	1.22	5.16	5.86	1.77	8.1	2.3	2.56
MH02g0282700	0	0.57	1.16	0.58	0	0.61	1.72	3.81	0	19.2	1.15	2.84
MH02g0286700	2.98	2.56	9.54	4.05	1.45	3.97	8.31	13.78	1.47	8.1	8.61	53.39
MH02g0297400	0	0	0.87	0.87	0	0	0.57	0	0	0	1.43	7.1
MH02g0300700	0.6	0.57	0	0	0.58	1.53	3.15	3.52	0	15.9	1.72	0.85
MH02g0302200	3.28	8.53	12.43	7.22	3.78	6.11	5.73	2.35	5.3	16.2	8.9	5.11
MH02g0303600	25.62	29.27	44.23	33.52	43.32	38.77	50.99	22.28	24.46	54.6	24.11	38.91
MH02g0306000	0	2.84	4.34	9.82	1.45	3.66	7.45	5.28	0.88	7.5	1.15	0.57
MH02g0335200	0	0	1.16	0.87	0.58	0.92	0.86	0.59	0	5.4	1.43	0
MH02g0342300	1.49	1.14	2.31	0.58	2.62	1.83	1.43	0.88	0	0.6	6.6	6.25
MH02g0363500	8.04	10.52	7.81	9.25	5.23	5.19	8.59	12.61	8.25	20.1	4.3	14.77
MH02g0384300	5.07	5.68	9.83	8.38	4.36	7.33	13.46	10.26	8.25	19.5	12.63	9.37
MH02g0386500	3.58	7.67	10.12	13	0.58	4.58	5.44	6.16	0.88	9.9	2.3	4.83
MH02g0386700	4.47	3.69	4.05	1.73	1.16	0.61	0	0.88	0	5.4	2.87	4.54
MH02g0386800	5.36	7.11	2.02	4.05	2.33	4.88	2.58	3.22	2.65	18.6	0.57	6.25
MH02g0387500	179.37	260.63	228.09	339.51	324.45	185.01	321.12	273.81	130.54	412.19	156.69	449.28
MH02g0389300	33.67	33.54	23.42	29.76	28.78	43.05	46.12	42.51	25.05	60	28.41	40.33
MH02g0392300	1.79	4.26	7.81	8.38	5.81	8.55	21.77	30.2	0	9.3	3.44	12.5
MH02g0392700	4.17	5.4	8.67	13	0	0	1.15	0.59	0	12.3	0.57	2.56
MH02g0402100	0.6	0	0	0	0	1.22	2.58	0	0	6.9	0	1.14
MH02g0403000	26.22	18.19	34.11	37.85	34.89	32.67	42.11	25.8	23.28	68.4	26.69	32.38
MH02g0403100	31.88	19.33	32.67	44.5	48.55	39.69	61.3	26.97	18.56	59.4	28.7	28.97
MH02g0408800	6.55	8.53	11.56	10.4	7.27	16.79	36.67	32.54	5.89	30.6	16.36	24.99
MH02g0427800	0.89	0.85	0	0.58	0.87	0.61	0.86	0	2.36	14.7	7.17	0
MH02g0440900	0	1.14	1.16	1.73	0.58	1.22	0	0.59	0	5.4	1.43	0.85
MH02g0443000	1.19	0	2.89	0.58	0	1.22	4.58	8.21	0	3.6	3.44	1.99
MH02g0457900	70.32	135	165.36	96.22	70.06	98.61	98.54	70.94	52.45	207	66	65.32
MH02g0459800	17.58	40.93	33.25	14.45	25	28.09	22.34	64.2	18.86	14.4	43.91	24.14
MH02g0463100	1.19	2.56	4.05	6.07	8.43	6.72	5.44	3.52	2.95	10.2	3.73	5.11
MH02g0464600	3.87	1.42	1.73	0.58	1.16	2.44	2.01	0.59	1.47	0.6	2.3	9.09
MH02g0466100	8.34	7.11	14.74	8.96	6.11	10.69	11.74	7.33	5.6	18.3	6.89	12.5
MH02g0466400	10.13	13.64	11.56	10.98	15.7	18.01	29.22	18.76	12.08	44.7	12.34	22.44
MH02g0469800	8.94	11.08	12.72	13.29	0.58	1.22	3.15	0.59	0	15.3	2.87	4.26
MH02g0476800	19.96	23.87	33.82	26	21.8	47.93	49.56	27.56	12.38	80.4	23.53	26.98
MH02g0479900	4.47	1.99	3.76	6.36	13.66	6.11	19.48	7.33	3.24	13.8	14.64	24.42
MH02g0480900	25.92	27	39.03	37.85	32.56	43.05	56.43	20.52	26.23	74.4	20.09	34.65
MH02g0482000	4.17	5.4	8.96	6.93	2.62	3.97	7.73	5.57	7.96	24	5.17	10.79
MH02g0482100	30.39	52.3	63.31	42.47	55.82	68.38	83.93	66.84	40.66	123	51.94	69.58
MH02g0482200	29.2	28.71	89.33	74.26	77.33	63.5	103.7	169.15	59.52	186	87.24	173.52
MH02g0489500	1.79	3.98	3.18	3.18	3.49	5.8	6.3	4.1	0.59	6.6	4.88	3.69
MH02g0489600	0	0	4.05	0.87	0	0	1.15	0	0	5.7	0	0
MH02g0492400	9.83	16.77	28.62	15.31	13.37	23.51	23.49	19.35	5.01	51	5.17	14.77
MH02g0493000	26.52	16.48	21.39	18.49	13.37	25.95	24.64	24.63	27.11	59.1	18.08	26.98
MH02g0493300	0	0	0.58	0	0	0.92	0	0	0	22.5	0	0
MH02g0493600	0	0	1.73	0	0	0	0	0.59	0	41.1	0	0
MH02g0495600	5.66	2.56	13.3	5.49	1.45	0.61	4.3	6.16	7.07	16.5	9.76	57.37
MH02g0502400	3.28	9.38	11.56	8.09	6.4	6.11	8.59	21.69	2.65	12.9	13.49	16.19
MH02g0504500	12.51	9.38	11.85	19.94	11.05	24.12	32.37	19.64	8.84	39.3	20.95	28.12
MH02g0505000	15.2	12.51	21.39	15.03	13.95	11.3	15.76	16.12	8.55	27	13.77	18.74
MH02g0505100	8.04	9.95	11.27	11.56	10.76	13.13	7.73	10.55	7.37	19.2	12.91	13.06
MH02g0507700	128.71	131.88	222.89	237.22	110.77	201.8	245.49	147.17	146.45	355.19	188.83	166.71
MH02g0510800	5.36	1.71	5.49	3.47	2.62	5.5	9.17	9.67	3.83	25.5	9.76	14.77
MH02g0510900	1.19	0.85	2.31	0	1.16	1.53	2.29	0.59	0	1.2	0	3.69
MH02g0512300	61.68	76.74	143.39	91.6	117.45	98.61	88.52	84.43	70.72	191.1	97.86	105.08
MH02g0512400	6.85	1.42	6.65	3.47	2.91	0	2.58	24.04	3.54	2.1	12.34	22.72
MH02g0513100	33.67	25.86	43.07	69.06	60.76	34.19	44.4	22.87	20.33	25.8	66.58	75.83
MH02g0516800	6.26	9.38	12.72	13.87	6.69	8.85	14.9	13.49	5.89	15	8.9	10.51
MH02g0522200	0	1.14	1.45	2.89	0.87	0	3.44	1.47	0	4.8	1.43	0.85
MH02g0524900	46.48	32.97	62.15	42.19	48.55	63.81	52.71	61.86	32.71	75.9	39.32	28.4
MH02g0527600	4.77	6.25	17.92	8.67	3.2	4.88	10.03	9.67	6.19	17.4	6.31	5.11
MH02g0527900	58.99	42.92	114.77	75.13	61.92	113.87	227.16	158.89	83.09	315.29	93.55	228.33
MH02g0528000	22.94	8.81	29.78	10.4	12.5	8.55	19.19	18.76	25.34	41.7	26.98	86.05
MH02g0539000	63.46	20.75	32.38	60.39	36.92	68.69	114.01	36.64	22.1	76.8	10.33	11.64
MH02g0540400	22.94	38.08	62.73	31.21	20.93	46.4	52.99	31.95	24.16	48.9	33.58	63.05
MH02g0541900	64.06	35.53	51.17	52.59	61.34	45.49	42.97	21.69	23.28	60.9	48.21	43.74
MH02g0544500	17.28	13.36	38.45	42.47	50	52.51	58.44	31.37	32.71	117.3	43.62	69.01
MH02g0548500	28.01	6.82	21.97	18.2	47.39	14.04	26.93	25.21	67.77	72.6	47.93	159.04
MH02g0550500	0.6	0.85	0.87	1.44	0	0.92	1.15	0	0	3.6	0	0.57
MH02g0550800	29.2	26.15	44.52	34.67	20.35	39.99	40.96	34.3	24.75	55.8	34.72	30.96
MH02g0551600	8.04	7.39	6.65	4.91	9.3	14.04	14.9	7.92	9.13	20.4	4.02	4.83
MH02g0552600	13.71	23.59	12.72	12.14	10.76	14.35	12.89	15.83	10.31	21.9	18.94	24.42
MH02g0555900	5.07	7.11	10.99	4.62	4.94	7.02	7.73	9.09	2.06	12.9	4.3	5.11
MH02g0556000	23.54	30.41	35.27	37.27	27.62	27.17	38.96	42.21	27.99	48	36.73	56.52
MH02g0560400	14.3	26.15	23.42	26.58	27.04	44.57	30.08	53.65	18.27	33.6	31.85	43.74
MH02g0561400	0.89	0	1.16	0.58	0	0	0	0	0	15.3	0.86	0.85
MH02g0566300	18.47	6.82	14.74	8.67	1.74	2.75	20.05	1.47	10.02	20.7	5.74	34.65
MH02g0567600	1.49	0.57	3.47	1.73	2.04	3.36	5.44	2.64	0	5.4	0	2.27
MH02g0567800	14.9	28.14	25.15	31.78	22.97	45.18	56.72	76.81	18.56	89.7	28.12	35.78
MH02g0584000	2.98	1.14	8.67	4.33	12.5	4.27	4.87	6.16	6.78	12.3	14.06	17.61
MH02g0588800	2.09	5.68	1.45	3.47	4.36	4.58	3.15	4.4	2.95	5.1	7.46	10.22
MH02g0589100	0	0.85	0.87	0	0	3.66	0.57	0.59	0	6	0	1.42
MH02g0595600	13.41	6.54	10.12	12.71	8.43	14.65	13.75	5.86	8.25	21.9	12.34	10.22
MH02g0595700	0.6	0	0	1.16	2.33	0	0	0.59	0	12.3	0	0
MH02g0604800	4.77	8.53	9.54	13.58	7.56	16.49	16.33	17	6.19	18	8.9	12.5
MH02g0607000	0.6	1.99	1.73	0.58	0	3.05	1.15	2.64	0	7.8	0	0
MH02g0607200	0	0	0	0.58	0	0.61	3.44	4.4	0	9	0.86	0.85
MH02g0607300	2.68	1.42	0.58	0	0	1.53	5.16	7.62	0.88	29.7	12.63	16.47
MH02g0607600	1.79	1.42	3.76	2.02	1.16	3.97	16.04	8.79	0.59	21	1.72	4.26
MH02g0609900	0	0.57	2.6	3.18	0.87	3.66	5.16	10.85	0.59	23.4	0.57	4.26
MH02g0611200	39.33	34.96	67.36	64.15	23.26	35.41	62.16	62.15	34.48	153	53.95	89.46
MH02g0615200	13.41	9.95	13.3	15.31	9.88	9.77	15.76	21.11	10.61	22.8	11.48	12.78
MH02g0621700	11.02	11.94	8.96	14.16	6.4	13.13	12.32	10.26	3.83	19.2	7.46	8.8
MH02g0625200	19.66	25.3	25.15	19.36	21.51	27.48	35.52	11.14	8.25	28.2	9.76	11.64
MH02g0626500	0.89	5.4	4.05	8.96	3.49	4.88	8.59	5.86	1.47	13.5	4.02	4.83
MH02g0628200	5.36	4.26	5.78	3.76	1.45	3.97	9.17	9.67	1.77	20.1	1.72	6.53
MH02g0643700	0	0.57	0.87	0.58	0	0.61	0.86	3.81	0	5.7	0	0
MH02g0644600	0	1.42	7.81	3.76	4.07	3.66	7.45	11.73	0.88	11.7	1.43	8.24
MH02g0645600	52.74	60.54	135	137.83	59.31	103.19	154.97	140.42	22.98	131.4	55.39	67.88
MH02g0647400	9.83	9.38	11.85	11.27	4.36	7.33	14.32	16.12	4.71	22.5	4.02	16.47
MH02g0648000	0	0	0	0	2.04	1.22	3.15	2.93	0	4.2	0.86	1.14
MH02g0649000	15.79	16.2	13.59	15.31	7.85	5.5	11.17	17	4.71	18.3	11.77	7.1
MH02g0649200	45.88	77.31	48.86	47.39	57.85	56.48	45.55	55.7	66.89	38.1	121.96	148.81
MH02g0659300	2.68	9.66	4.91	9.82	3.49	3.97	6.3	10.85	2.06	9.9	10.04	9.94
MH02g0661300	0	0	2.02	0	0	2.44	0.57	2.64	0	17.4	0	0
MH02g0661800	2.09	0.57	2.02	3.76	0	0	1.15	0.59	0.59	7.2	1.43	0.57
MH02g0666200	22.64	23.87	58.68	18.2	20.93	37.55	42.11	22.87	20.33	43.8	27.26	25.84
MH02g0667400	14.3	10.8	14.74	15.31	18.02	15.26	18.33	12.9	9.43	28.2	9.76	14.48
MH02g0671100	4.47	4.26	4.05	5.2	6.69	9.46	10.89	4.98	2.95	12.3	5.17	7.1
MH02g0674700	6.55	4.55	8.38	3.76	6.4	10.99	14.32	6.45	1.77	27.3	4.59	7.67
MH02g0690000	39.33	30.98	34.11	16.76	20.06	24.73	30.36	19.35	20.04	41.1	18.65	35.78
MH02g0690800	0.6	0	1.16	0	0	0	1.15	0.59	0	6.3	2.58	0.85
MH02g0691800	9.24	4.83	12.14	10.11	3.2	6.41	12.32	3.81	6.48	25.2	8.32	30.67
MH02g0692500	3.28	6.54	7.52	6.93	4.94	3.66	6.88	6.16	2.36	11.1	6.89	7.95
MH02g0695600	159.4	147.51	253.82	199.66	138.68	233.55	194.22	168.57	146.15	314.99	195.14	193.97
MH02g0696600	0	0	0.58	0.58	0.87	1.53	0	1.17	4.13	0.9	6.31	13.92
MH02g0697400	1.19	1.71	2.89	2.6	7.27	11.3	10.03	14.95	5.01	13.2	11.77	13.92
MH02g0698100	14.3	6.25	17.92	15.89	15.12	20.45	23.78	12.02	7.66	34.5	9.47	11.64
MH02g0700700	5.96	10.23	34.11	19.36	13.95	23.81	20.91	17.59	7.96	29.1	11.19	9.94
MH02g0708800	3.28	7.11	3.76	6.07	5.52	4.58	4.58	5.28	1.77	9.9	2.87	5.96
MH02g0710700	26.82	23.02	34.11	29.18	20.64	33.28	46.41	37.52	32.12	90.6	26.69	36.64
MH02g0710900	9.24	11.65	18.21	27.16	17.44	20.76	31.22	23.75	11.79	58.5	12.34	19.88
MH02g0711300	14.3	17.34	19.37	16.18	14.54	17.1	15.18	13.78	9.43	15.6	22.1	19.31
MH02g0711900	11.02	15.63	22.26	16.76	14.83	12.21	19.19	19.06	11.79	24	10.91	18.18
MH02g0712100	33.67	36.38	53.19	69.06	37.21	58.62	73.62	42.51	32.41	69.9	25.54	28.4
MH02g0712500	17.58	10.52	25.73	19.36	15.99	24.12	33.52	21.4	15.91	57	18.37	21.58
MH03g0013100	9.24	6.54	17.63	21.38	11.34	14.35	20.63	15.83	9.72	31.5	14.92	15.34
MH03g0015800	24.43	14.21	12.43	15.03	18.02	21.37	8.59	15.24	12.38	9	26.4	24.71
MH03g0017400	24.13	23.31	36.71	30.92	18.32	29.61	36.09	23.45	23.28	49.2	15.5	22.15
MH03g0020100	114.41	49.45	130.96	107.78	100.88	97.69	159.84	106.42	127	263.69	123.97	148.53
MH03g0020900	0	1.14	0	0	0	1.22	0	0.88	0	3.6	0	0
MH03g0021200	91.17	17.34	54.93	41.9	84.89	18.32	51.28	29.02	100.48	216.6	73.75	137.17
MH03g0021400	8.64	13.07	25.44	25.72	12.79	24.42	25.49	22.87	9.72	38.1	13.77	26.7
MH03g0037500	10.73	10.8	21.1	20.51	17.73	13.43	23.78	11.73	12.08	47.1	9.76	12.21
MH03g0040400	31.58	26.72	49.72	40.16	19.48	36.94	48.98	37.23	33.3	77.1	34.44	44.59
MH03g0041000	28.01	54.29	46.83	41.32	35.47	55.26	66.74	47.78	35.65	74.1	37.88	53.11
MH03g0043300	108.45	208.05	92.8	36.12	3.2	13.43	16.61	8.5	46.26	26.7	38.17	111.04
MH03g0043500	0	0	5.78	6.36	0	3.05	0.57	5.28	0	3.9	4.88	7.38
MH03g0044200	16.39	31.83	34.69	36.98	23.26	27.17	40.68	28.73	16.8	42.9	24.68	23
MH03g0047500	46.48	22.45	34.69	51.72	33.72	44.27	27.79	14.95	30.94	13.5	62.27	47.14
MH03g0050400	15.49	9.09	67.65	17.91	9.01	11.91	14.04	25.21	8.55	21.6	20.95	25.56
MH03g0060000	4.17	7.11	6.36	6.65	7.85	10.38	13.18	13.78	4.71	15.6	6.03	11.36
MH03g0060400	5.66	14.5	15.03	12.71	4.65	13.13	14.32	9.67	5.89	7.8	18.37	25.84
MH03g0061800	40.22	58.55	82.39	87.84	50.88	72.66	106.56	104.36	43.32	124.5	45.34	42.6
MH03g0063200	25.03	25.58	45.1	39.3	28.49	31.44	39.53	17.88	14.44	102.3	17.79	31.52
MH03g0063400	6.26	5.4	10.41	6.07	5.52	10.38	11.74	16.42	4.13	12.3	5.45	11.64
MH03g0072900	0.6	0	0.87	0.58	0.58	0.92	0.86	1.76	0	4.2	0.86	4.26
MH03g0073500	0	0.85	3.47	1.16	0	1.83	0.57	2.35	0.59	0	8.61	2.56
MH03g0082000	4.17	6.54	13.88	5.78	1.74	6.11	8.59	24.04	3.54	16.5	5.17	2.56
MH03g0082950	2.68	8.81	13.59	2.6	1.45	1.83	1.15	0.88	0.59	14.7	0.86	1.14
MH03g0083400	9.53	4.55	4.34	4.91	36.05	16.79	16.33	1.47	5.89	17.4	4.02	5.96
MH03g0084100	0	1.14	4.34	2.31	0.87	0	4.3	7.92	1.18	12.6	6.6	18.18
MH03g0084400	8.94	18.47	14.74	16.76	16.57	21.68	20.91	10.55	2.36	24.3	4.88	4.54
MH03g0086100	84.32	82.71	78.05	91.88	13.66	5.19	46.41	46.91	49.5	190.2	151.81	308.99
MH03g0087400	17.28	15.06	23.13	35.83	26.46	21.98	34.95	12.9	15.62	33.9	10.91	11.36
MH03g0094200	14.3	15.35	10.12	10.11	24.13	41.21	18.62	9.67	15.91	59.4	2.3	2.27
MH03g0103700	7.15	15.63	19.37	19.94	10.47	18.01	11.17	18.18	7.96	20.7	10.62	14.2
MH03g0105600	19.07	22.45	42.5	32.07	23.26	26.56	45.55	29.9	23.87	57.9	29.85	33.23
MH03g0107300	15.49	26.43	36.43	20.51	25	29.92	42.68	42.51	20.63	45.6	27.26	49.98
MH03g0108100	4.47	2.27	6.07	4.91	0.58	5.19	18.91	6.45	0.88	14.4	3.16	9.94
MH03g0111000	43.5	23.87	44.23	44.5	61.34	51.59	46.12	31.07	28.29	59.1	26.11	26.41
MH03g0113500	67.63	89.53	100.31	76.86	62.8	105.32	101.69	90.59	53.33	115.8	64.57	79.24
MH03g0114300	15.79	9.38	22.26	17.63	14.54	14.65	20.91	17.3	12.38	26.4	19.51	20.73
MH03g0115200	5.07	11.08	15.03	16.18	7.56	15.57	23.49	19.64	6.78	18.9	8.04	11.08
MH03g0117200	9.24	11.65	132.69	15.31	38.38	46.71	54.43	165.05	31.53	155.1	54.53	74.41
MH03g0118400	1.19	0.85	2.31	1.16	0	1.53	0	2.35	1.18	8.7	1.43	2.84
MH03g0121700	17.28	3.98	19.66	10.11	9.01	9.46	19.77	15.83	14.44	50.1	15.78	14.2
MH03g0122300	14.3	10.23	21.39	20.51	11.92	25.64	16.33	25.8	6.48	29.4	19.8	37.77
MH03g0126400	0	0	2.89	2.89	0.58	0.92	0	4.98	0	9.9	1.43	4.54
MH03g0126900	0	0	0.87	0.87	0	0	0	1.76	0	3	1.15	7.95
MH03g0128400	38.44	69.06	91.06	73.68	30.82	34.5	67.6	153.91	23.28	150.3	29.85	72.7
MH03g0133900	47.97	46.33	32.96	24.27	17.44	24.73	29.79	51.01	23.28	58.2	29.27	53.68
MH03g0137000	1.49	1.14	0	0	0.87	0.92	3.15	1.76	0	14.7	1.43	1.7
MH03g0138400	5.96	3.69	5.2	9.25	5.81	7.94	5.16	9.38	2.06	9.9	2.3	5.96
MH03g0144100	10.73	14.21	12.72	18.49	14.25	11.3	16.04	12.9	19.45	7.2	30.71	52.26
MH03g0148300	9.24	7.67	13.3	12.42	4.65	9.46	8.88	19.06	7.96	20.7	9.47	14.77
MH03g0148800	3.58	7.96	17.63	4.33	2.04	0	2.01	0.88	3.83	15	8.61	5.4
MH03g0149000	30.09	17.62	30.93	32.36	2.91	3.66	2.86	3.81	7.96	20.7	13.2	27.26
MH03g0152500	17.28	20.46	18.5	21.67	14.25	23.2	16.61	21.11	12.08	12.6	27.84	23.86
MH03g0153900	2.68	4.55	23.71	2.89	0	1.83	2.58	5.28	1.18	14.4	5.74	12.78
MH03g0157000	1.79	2.27	3.76	2.02	2.33	4.27	6.88	3.52	1.47	11.1	2.01	3.98
MH03g0158900	7.15	13.64	9.83	9.25	7.27	11.6	11.17	11.73	6.78	21	6.89	13.92
MH03g0160100	3.87	9.09	19.37	13.29	3.49	8.55	28.65	41.92	9.43	33.6	11.48	46.29
MH03g0160500	11.92	14.21	15.9	13.58	15.99	14.65	14.9	15.83	8.55	30.6	12.34	13.06
MH03g0161700	0	0.57	2.31	5.49	0	3.36	3.72	9.97	0.59	42.6	2.58	2.56
MH03g0164600	3.87	4.55	19.66	6.07	0.87	5.19	7.45	26.97	2.36	14.4	31.57	23.57
MH03g0164700	11.62	8.24	14.17	8.67	12.79	6.41	7.45	7.62	7.66	2.7	22.1	15.62
MH03g0167500	13.71	5.97	9.83	9.54	5.81	6.41	8.88	7.04	4.13	25.2	6.6	7.38
MH03g0172200	22.94	0.57	4.34	1.16	0.58	0	0	1.76	26.52	0	30.42	142.57
MH03g0175100	5.96	9.66	23.99	16.18	15.7	22.29	26.35	24.92	11.2	37.2	11.48	12.5
MH03g0178400	73	81.57	89.33	102	123.56	111.74	86.8	74.46	64.24	81.9	157.55	156.2
MH03g0179100	38.44	19.9	26.31	39.01	23.84	23.81	29.79	25.21	18.27	79.5	28.98	40.61
MH03g0188700	52.74	50.87	81.81	82.06	46.81	88.23	87.66	56.29	65.42	158.4	79.78	110.48
MH03g0188900	232.7	100.33	77.76	58.37	25.87	47.32	30.08	47.78	54.22	87.9	152.38	115.02
MH03g0191000	5.66	7.39	8.96	5.78	6.4	7.94	8.02	7.92	3.54	11.1	6.6	5.96
MH03g0191150	0	0.57	2.89	0	0	0	0.57	0	1.77	10.2	0.86	2.56
MH03g0191500	1.49	4.26	6.36	4.33	1.16	6.11	8.31	4.4	0.88	8.1	2.58	5.4
MH03g0192400	3.58	5.68	7.81	6.93	3.2	4.58	6.3	8.5	2.95	10.8	6.31	9.66
MH03g0194300	2.38	2.56	4.05	8.38	11.05	8.24	13.75	9.09	2.65	12.3	7.75	22.72
MH03g0194600	4.17	11.65	29.49	15.03	7.27	14.96	20.63	19.35	5.6	29.7	14.92	13.06
MH03g0196100	5.66	11.08	23.42	11.27	7.27	14.65	12.89	13.49	7.66	20.1	7.17	6.53
MH03g0209700	109.94	55.71	87.88	82.64	70.36	69.61	122.89	75.05	81.92	289.19	62.85	109.62
MH03g0213200	8.94	3.69	13.3	4.05	2.62	4.88	7.73	25.5	5.3	18.6	11.48	12.21
MH03g0213800	21.75	15.35	47.99	42.19	24.42	56.48	71.33	39.87	16.8	193.5	22.67	55.38
MH03g0215400	3.87	7.39	5.2	3.18	1.74	6.72	5.73	7.62	1.77	6.3	4.3	13.63
MH03g0215700	4.17	5.12	7.81	4.62	5.52	6.41	11.74	12.02	1.18	17.7	3.44	10.22
MH03g0221800	112.92	207.19	98.29	153.14	122.39	94.33	86.22	100.26	70.42	47.4	200.6	163.87
MH03g0224400	12.22	19.33	42.78	35.54	17.73	30.53	36.95	34.3	21.22	51.3	26.98	22.72
MH03g0228700	37.54	24.16	26.6	18.78	24.71	36.94	30.36	33.13	17.39	84	29.27	32.09
MH03g0230700	9.53	13.64	21.1	14.16	19.19	14.04	13.75	13.49	5.6	40.2	20.66	19.31
MH03g0235600	23.54	14.5	20.81	9.25	8.14	3.97	21.2	14.95	26.52	53.1	37.59	129.79
MH03g0235900	0.89	0	1.16	1.73	3.49	3.97	4.3	0.88	0.88	15.3	1.15	0
MH03g0236600	25.33	27	35.56	26.87	26.46	47.63	38.67	31.66	24.75	60.9	20.38	26.98
MH03g0257800	13.41	8.24	15.32	11.85	11.34	12.21	16.04	11.73	8.84	26.7	12.91	13.63
MH03g0257900	8.64	16.48	15.61	10.4	10.18	12.82	15.18	25.21	14.44	16.8	29.85	30.96
MH03g0258500	36.95	20.46	34.69	60.97	23.55	28.7	32.94	29.02	14.73	31.2	21.81	24.42
MH03g0259100	0.89	3.13	1.73	1.44	0	1.83	0.86	5.57	0.59	10.5	2.01	0
MH03g0259700	37.84	57.98	55.22	32.65	26.75	36.02	39.53	36.64	30.64	91.5	48.79	55.66
MH03g0265700	0	0	0	0	0	0	0	0	1.47	1.2	2.87	7.67
MH03g0267300	3.87	3.41	8.67	5.2	3.78	10.99	8.59	4.4	4.42	16.2	4.3	6.25
MH03g0267900	5.66	12.51	4.63	11.85	11.34	35.72	19.48	22.57	2.36	36.3	3.73	9.94
MH03g0272300	27.71	66.79	39.61	26.58	22.68	22.9	30.65	28.44	29.17	20.7	39.6	61.91
MH03g0278100	1.79	8.81	7.52	17.34	6.69	8.85	10.03	8.79	4.42	6.9	13.2	3.12
MH03g0282200	2.38	1.14	1.16	3.18	1.45	2.75	1.43	1.76	0	4.8	0	0
MH03g0287000	0	1.42	0	0	0	0.61	1.15	1.76	0	6.6	0	0.57
MH03g0289200	11.32	6.25	1.73	1.16	3.78	4.88	2.86	2.35	7.37	22.5	2.58	1.99
MH03g0302400	3.28	7.67	9.54	7.8	5.81	5.19	5.73	7.04	2.65	9.9	3.73	6.82
MH03g0304000	10.13	10.52	15.9	22.25	9.01	5.8	5.44	4.1	7.96	26.4	12.34	7.67
MH03g0325700	21.75	13.07	23.99	27.45	11.63	12.21	20.05	14.95	14.44	29.4	17.51	26.98
MH03g0328500	7.75	6.54	7.81	8.96	6.69	9.16	12.6	12.31	4.42	23.1	4.02	7.1
MH03g0333300	3.28	3.13	10.7	11.27	3.78	2.75	7.45	2.93	2.65	13.2	4.3	5.4
MH03g0335500	3.28	3.41	6.65	4.62	4.07	2.44	4.58	4.4	2.36	15	4.02	7.67
MH03g0339600	100.11	66.79	82.68	112.69	77.91	106.24	104.27	74.17	81.33	171.3	135.45	90.6
MH03g0341500	1.19	1.42	0.87	0	4.36	1.53	2.58	0	0	4.8	0.57	1.42
MH03g0343700	0	2.27	2.31	0.58	0	0	0.86	2.05	0	3.6	1.43	3.12
MH03g0358500	0.6	0	1.45	0	0	0	0.57	1.76	0	48.9	0	1.7
MH03g0360500	71.81	13.07	24.28	15.03	17.73	29	26.93	8.79	15.03	39.3	20.09	30.67
MH03g0371600	10.73	15.06	13.88	8.96	10.18	10.07	12.89	17.59	7.07	38.1	20.38	39.48
MH03g0382700	4.17	9.66	13.3	7.8	6.98	3.97	13.18	11.43	3.24	12.3	6.89	5.4
MH03g0408700	0	0	2.6	0.58	4.07	0.61	1.15	2.64	0	11.1	0	1.14
MH03g0417000	3.28	25.3	8.09	6.36	2.04	8.24	4.3	12.61	2.95	2.7	15.78	9.09
MH03g0418500	1.19	3.13	4.05	6.36	2.33	6.72	6.59	7.04	1.18	7.2	2.58	2.27
MH03g0431500	94.15	54.85	54.06	74.55	72.68	43.96	89.95	67.13	55.69	112.8	42.76	48
MH03g0437700	1.19	3.13	2.6	1.44	0	1.22	0.57	0.88	0	6.6	0.57	0.85
MH03g0438800	12.81	19.04	10.7	11.56	8.14	6.41	10.89	7.62	25.05	54.9	14.35	32.38
MH03g0441100	21.15	16.2	34.69	20.51	21.22	36.63	33.23	14.36	15.03	59.7	23.25	20.45
MH03g0445300	2.38	3.13	2.31	3.76	4.94	2.14	2.29	2.35	0.88	1.5	4.59	6.25
MH03g0451800	16.69	20.46	16.77	15.89	7.85	10.99	15.47	14.07	7.07	11.1	9.47	17.61
MH03g0452600	0	1.71	1.16	0.87	7.85	2.14	1.15	4.69	3.83	0.6	13.49	8.24
MH03g0472500	5.36	0.57	8.09	6.07	19.48	9.16	11.17	0	3.83	12.3	3.73	6.53
MH03g0490400	6.85	8.81	6.94	7.51	0.58	3.97	7.73	12.02	5.3	33.9	4.88	14.2
MH03g0499200	27.71	35.53	45.68	42.19	54.37	17.1	21.77	63.03	26.52	16.5	126.27	59.36
MH03g0502400	0	0.85	3.47	3.18	2.62	8.55	7.16	5.28	0.59	10.8	2.58	2.84
MH03g0506000	0	1.99	10.41	2.02	1.74	0.92	1.72	6.45	1.47	8.1	1.72	2.84
MH03g0506600	7.45	7.96	9.83	13.29	7.56	12.52	17.19	7.92	7.66	32.4	6.6	9.09
MH03g0511400	4.77	10.23	10.99	8.96	5.23	14.35	8.31	9.09	3.83	4.5	16.07	7.67
MH03g0522000	7.75	13.64	12.43	8.09	5.23	11.3	10.31	11.43	9.43	21.9	9.18	9.09
MH03g0522300	1.19	8.24	4.91	3.18	3.2	8.85	1.43	7.04	1.47	9	8.04	6.82
MH03g0522700	33.07	16.48	36.43	24.85	24.13	22.9	40.39	37.82	9.72	40.2	17.51	22.44
MH03g0537900	15.49	17.34	22.55	17.05	15.41	14.96	24.92	36.06	16.21	34.8	22.96	29.25
MH03g0539100	5.36	3.98	9.25	5.78	6.11	6.41	5.73	11.14	4.13	13.8	5.74	28.12
MH03g0539400	8.64	11.65	13.3	10.11	4.94	10.69	10.03	7.62	7.96	22.2	10.33	15.34
MH03g0543700	7.75	7.96	11.56	8.67	2.33	8.85	20.05	24.63	7.07	25.2	12.05	14.2
MH03g0547400	44.69	26.72	47.7	45.65	46.81	40.91	64.45	49.54	29.76	64.8	25.83	41.46
MH03g0548700	24.43	20.18	13.01	17.34	16.86	22.9	21.77	33.42	12.08	17.7	26.69	28.68
MH03g0550100	3.28	2.84	6.65	4.62	2.33	5.5	4.87	1.76	1.47	8.7	1.43	2.27
MH03g0569600	15.49	14.5	11.85	14.16	9.88	11.3	10.89	11.43	13.85	15	14.64	41.46
MH03g0571600	9.83	7.67	17.06	10.69	10.76	14.96	20.63	15.24	8.55	28.8	11.48	11.93
MH03g0582700	10.73	17.62	22.84	14.74	9.88	17.1	22.63	33.42	10.02	29.4	11.77	19.31
MH03g0585200	43.5	29.56	45.96	43.05	74.13	75.71	88.52	54.82	45.97	45	49.65	96.28
MH03g0593300	25.03	21.32	44.81	44.21	31.98	38.16	49.56	43.09	20.63	65.4	23.82	26.98
MH03g0596500	24.43	19.61	26.6	28.89	18.9	16.49	20.63	20.81	16.21	23.4	57.97	49.13
MH03g0598400	16.39	8.24	11.56	12.71	9.88	11.3	19.19	11.43	5.3	16.2	12.91	11.64
MH03g0599000	5.66	15.92	7.81	5.78	4.65	7.94	6.59	6.16	4.71	9	9.76	13.35
MH03g0599100	297.95	272.56	204.67	272.47	206.12	164.86	126.04	131.34	175.32	123.6	394.31	272.64
MH03g0599200	11.32	24.44	23.99	22.83	22.68	25.64	24.35	25.8	17.97	52.5	57.97	38.34
MH03g0611500	0.6	1.14	1.45	3.76	1.45	0.61	2.86	4.1	0.59	6.3	0.86	0.85
MH03g0613400	6.26	7.96	13.59	11.85	6.69	9.16	7.16	17.59	8.25	6.3	20.38	10.22
MH03g0614700	22.35	30.41	31.51	23.69	40.41	36.33	30.65	31.95	24.16	39.6	42.19	63.9
MH03g0618500	19.07	22.74	31.8	32.07	22.1	25.34	35.52	13.19	12.67	51.9	24.68	16.47
MH03g0619400	5.07	5.4	5.49	8.38	3.2	10.07	11.17	15.24	4.42	23.7	4.02	9.09
MH03g0620300	18.47	23.02	79.21	48.25	30.24	21.37	20.05	38.7	36.24	81.6	39.6	47.43
MH03g0625100	10.13	5.97	22.84	10.98	4.65	10.69	14.9	21.11	7.66	40.2	7.17	25.56
MH03g0626400	10.73	13.36	10.99	26	6.11	8.85	17.19	19.64	10.9	24.6	9.76	10.51
MH03g0626500	0.89	7.67	5.49	6.65	1.74	1.22	0.57	4.69	0.59	5.1	6.6	3.41
MH03g0629100	34.86	48.89	28.33	18.78	17.44	25.03	26.07	35.47	19.74	48.3	34.44	47.71
MH03g0646800	0	0	0	0	0	0	0	0	0	0	6.31	6.25
MH03g0647200	0	1.42	0	1.44	0	1.22	1.43	1.17	0	6	0	0
MH03g0648500	28.31	30.41	63.02	10.69	15.41	18.62	21.2	22.87	7.96	66.6	20.38	15.05
MH03g0649000	8.64	11.65	14.45	10.69	6.11	10.38	14.04	21.4	7.07	21	9.18	22.15
MH03g0650700	10.43	6.25	14.45	20.23	0	0.92	2.86	2.05	2.65	15.9	2.87	7.1
MH03g0652000	15.2	18.76	30.35	27.45	11.92	15.57	15.76	26.97	6.78	19.8	18.65	24.99
MH03g0657900	16.98	17.62	16.77	9.82	12.79	9.46	10.6	10.26	11.2	22.8	16.36	22.44
MH03g0671300	1.49	0	0.87	0	3.2	2.75	1.15	0.59	2.06	29.1	2.01	4.83
MH03g0671800	40.22	29.56	48.28	55.19	52.91	52.2	77.92	63.32	24.75	151.8	31.85	61.63
MH03g0675000	5.07	8.81	15.61	16.47	8.72	14.04	15.18	8.21	5.89	20.4	22.67	15.34
MH03g0675600	2.09	16.2	15.32	7.51	3.49	13.74	9.74	10.55	9.13	7.2	16.36	23.57
MH03g0678000	30.09	13.07	21.39	33.52	29.65	35.41	24.06	16.42	16.5	38.7	16.93	28.4
MH03g0680700	4.17	8.81	9.54	8.38	6.4	7.33	8.02	8.5	2.36	14.4	6.03	3.98
MH03g0680800	43.2	56.84	47.7	80.9	47.39	60.45	69.32	37.52	55.1	61.5	101.02	142.28
MH03g0681300	5.96	7.11	4.05	5.49	3.2	10.38	6.88	6.74	4.13	27	5.17	31.81
MH03g0683300	10.13	11.37	20.81	8.67	14.54	12.21	12.89	10.85	21.81	44.4	33.29	29.82
MH03g0685400	0.6	2.56	5.78	2.89	1.74	6.11	6.02	8.5	0.59	11.7	3.44	3.12
MH03g0685800	26.22	29.84	31.8	44.79	60.47	67.77	52.99	36.64	21.51	151.2	53.95	51.69
MH03g0687400	1.19	5.12	3.76	4.91	4.07	3.97	6.88	0.59	0	22.5	1.72	1.99
MH03g0689900	2.38	2.27	3.76	2.02	1.16	3.36	4.87	5.57	1.47	7.8	5.74	21.02
MH03g0699300	44.1	18.76	43.36	39.87	33.72	24.73	44.97	36.64	19.15	38.7	23.53	25.56
MH03g0713000	40.52	25.86	54.35	53.17	19.48	35.72	63.31	57.75	29.47	59.7	39.32	95.99
MH03g0714400	5.36	4.83	4.63	4.62	6.4	4.88	4.3	1.76	0.88	8.4	3.16	3.12
MH03g0718500	0.6	4.55	3.18	0.58	3.2	2.75	5.16	4.4	0.59	10.8	4.02	7.67
MH03g0718900	68.53	91.8	173.45	162.39	83.73	149.59	180.76	193.19	79.56	367.19	80.35	100.82
MH03g0721100	1.79	5.97	6.07	5.78	8.43	2.44	5.73	10.55	2.65	6.9	11.77	9.37
MH03g0722400	10.43	13.64	23.71	16.47	7.56	13.13	27.21	16.71	5.01	43.8	10.33	18.74
MH03g0723200	4.47	3.41	18.79	8.67	13.08	15.57	15.76	21.4	7.07	24.3	19.8	20.73
MH03g0726500	61.97	47.75	74.3	65.3	54.07	45.79	67.6	59.51	22.39	112.2	48.21	46.86
MH03g0728300	63.76	42.35	32.09	20.23	36.05	54.95	31.8	53.06	60.41	133.5	35.87	58.79
MH03g0729800	0	2.56	5.2	3.18	0.87	1.53	2.29	2.35	0	4.2	0.86	1.14
MH03g0730000	1.49	1.71	3.18	3.18	0	2.14	8.59	2.93	0	7.2	1.15	2.84
MH03g0730200	2.38	3.69	2.89	5.2	4.36	8.24	7.73	7.04	2.36	10.5	4.88	3.69
MH03g0730400	23.24	39.22	19.08	14.16	15.7	20.45	19.19	17.88	18.86	30.6	53.09	76.96
MH03g0732800	6.26	4.55	6.65	6.93	2.33	7.63	11.74	4.98	3.24	19.5	2.58	7.95
MH03g0734800	26.22	57.13	48.86	33.52	21.51	30.83	35.81	56.58	7.37	49.2	72.89	49.13
MH03g0735900	38.14	35.81	47.99	30.05	42.74	35.72	50.42	26.09	31.82	76.2	39.03	63.9
MH03g0736000	2.38	4.26	2.6	0.87	2.04	5.8	2.01	4.69	2.36	8.1	18.37	12.21
MH03g0737900	129.61	141.26	66.49	91.02	96.81	39.08	48.98	80.91	133.48	43.2	274.64	187.44
MH03g0738300	161.79	123.35	233.29	230.87	95.07	158.14	225.44	304.3	123.17	278.09	136.89	173.52
MH03g0745800	0	0.57	3.18	2.02	0	2.75	2.58	3.81	0	10.8	1.43	0.85
MH03g0748200	21.15	36.1	25.73	14.16	41.86	37.25	34.09	29.9	25.64	75	20.38	26.7
MH03g0749700	0	0	0	0.58	1.16	1.22	2.86	10.85	0	12.9	1.72	3.69
MH03g0749900	5.36	3.98	7.23	6.93	11.34	8.85	10.89	6.16	4.71	15.6	5.17	1.99
MH03g0751900	0	2.27	5.2	4.62	0.58	0.61	0	0	2.06	8.4	0.57	1.14
MH03g0755500	19.37	26.43	26.02	24.85	21.8	25.64	32.66	47.2	19.45	58.5	18.08	21.3
MH03g0756000	32.77	34.96	35.27	40.74	34.6	40.6	55.57	32.25	18.27	33.6	27.84	42.32
MH03g0760400	2.09	5.4	8.67	8.38	7.27	5.8	3.72	6.16	2.95	14.7	10.04	8.52
MH03g0761000	0	0	0.58	0	0	0	0	2.05	0	0	1.15	7.95
MH03g0761500	14.9	19.33	13.59	13.58	14.25	19.23	16.04	10.26	10.02	10.5	16.07	22.15
MH03g0763800	26.22	23.31	49.14	34.96	29.36	31.14	47.55	29.9	21.81	65.1	31.28	30.39
MH03g0763900	4.77	2.27	6.94	4.91	10.76	7.94	4.3	3.22	4.42	12.6	1.72	3.98
MH03g0764900	32.77	14.78	17.92	10.11	38.67	25.03	25.49	50.72	20.33	11.7	26.69	50.84
MH04g0010600	0.6	0	0	0	0	0	0	0	0	12.3	0	0
MH04g0012100	3.58	2.84	7.81	13.29	3.78	7.63	7.45	5.57	1.77	5.4	10.04	7.1
MH04g0027800	4.47	4.55	4.91	10.11	4.94	7.33	9.17	6.74	2.06	9.9	4.88	2.84
MH04g0045700	27.71	1.14	2.6	5.2	5.52	4.88	3.72	0	1.77	9	0.86	2.56
MH04g0047300	45.88	41.5	64.76	56.34	33.14	47.32	53.28	32.54	23.28	84.3	30.42	44.02
MH04g0065200	0	0	0.58	0	0	0	1.72	1.76	0	0	1.43	6.53
MH04g0068300	0.6	0.85	1.16	0	0.87	1.53	1.72	0	0	8.4	1.15	1.14
MH04g0086400	6.26	10.8	17.92	15.03	11.63	19.54	22.63	21.69	6.48	29.1	11.77	17.32
MH04g0099500	2.09	1.42	5.78	6.07	17.15	20.15	25.21	30.78	9.72	21	14.64	32.09
MH04g0106600	33.07	23.87	27.17	23.12	26.17	18.01	20.91	33.13	41.84	34.2	40.18	96.56
MH04g0117500	13.71	16.48	24.57	27.45	20.06	27.78	32.94	18.47	11.49	35.1	18.94	19.31
MH04g0127700	0	0	0	0	0	0.92	0	0	0	7.5	0	0
MH04g0135000	0	2.84	2.6	0.58	1.45	3.97	2.58	5.86	0	1.5	5.45	1.99
MH04g0152000	0.89	1.42	8.96	2.6	1.16	1.83	13.75	28.73	0	6.3	2.3	9.09
MH04g0168800	3.58	0.57	2.31	2.31	7.56	4.58	3.15	0.88	0.59	8.1	1.72	2.56
MH04g0186300	0.89	0.85	2.89	1.16	2.04	1.83	1.15	1.17	0	4.5	0	0.57
MH04g0213500	0	0	0	0.58	0	2.44	0	0	0	3.6	0	0
MH04g0220700	3.87	8.81	11.27	10.4	9.3	9.46	16.04	10.85	2.95	11.1	7.46	6.82
MH04g0237400	2.98	3.13	14.17	6.93	6.98	11.6	14.9	9.67	2.06	18.9	6.31	7.67
MH04g0248300	39.63	22.17	36.71	68.77	74.13	72.05	79.92	3.52	21.81	75.3	19.8	16.47
MH04g0267800	4.77	3.41	7.23	3.76	0	0	0	0	2.65	2.1	11.48	14.77
MH04g0268100	22.05	16.48	28.33	22.54	5.81	8.85	13.75	15.24	8.84	31.5	11.77	8.8
MH04g0268400	5.66	8.24	19.66	11.85	14.83	11.3	11.17	29.32	11.2	12.6	18.08	24.99
MH04g0269300	2.38	2.27	5.49	8.38	5.23	6.11	6.88	4.4	1.18	7.2	3.73	3.41
MH04g0278400	60.78	44.05	54.06	34.67	30.53	34.19	40.96	17.3	32.12	72	39.6	46.58
MH04g0300700	0	0	0.58	1.44	4.65	0.92	1.43	12.02	0	0.9	2.87	6.25
MH04g0308300	8.64	0	14.17	5.49	0.58	0	4.58	31.95	2.36	2.1	27.55	26.7
MH04g0310000	5.66	9.66	3.76	6.36	4.94	3.66	4.3	5.86	4.42	8.7	15.21	10.51
MH04g0312700	3.58	9.38	8.96	12.42	4.94	7.02	11.17	11.73	3.24	12.9	4.88	7.1
MH04g0314100	0.6	0.57	0	2.02	1.16	0.61	0	0	0	3.9	0	0
MH04g0333300	104.58	134.43	58.97	46.81	18.61	18.32	20.05	30.78	30.64	38.1	140.04	193.4
MH04g0353400	1.79	7.11	19.37	6.07	3.2	4.27	2.01	10.26	3.24	5.1	7.75	11.08
MH04g0361100	10.73	15.06	19.37	20.51	6.98	9.77	11.17	12.9	9.72	21.6	9.47	10.51
MH04g0363000	1.79	6.82	7.52	5.2	0.87	4.27	2.01	6.74	0.59	12.6	8.04	5.4
MH04g0363400	1.19	0.57	0	0	0	0	0	0	1.47	0.9	1.43	14.77
MH04g0377100	3.87	1.71	4.05	6.36	1.16	3.97	10.31	10.26	1.77	14.4	4.88	13.06
MH04g0377200	19.96	23.31	29.78	23.69	17.44	18.01	22.34	25.21	18.86	51.3	16.07	21.87
MH04g0381300	22.94	18.19	20.24	21.38	11.92	26.56	31.8	15.54	10.61	83.7	17.51	50.84
MH04g0394000	4.77	2.56	10.12	8.67	11.34	11.91	14.9	8.79	5.3	31.2	4.88	12.78
MH04g0394800	28.9	27.85	38.74	23.12	17.44	27.78	40.1	22.87	22.69	49.5	28.98	47.71
MH04g0400400	2.09	2.56	7.81	6.36	3.49	8.24	7.45	12.61	3.54	11.1	6.6	17.61
MH04g0401900	21.15	24.73	42.78	37.85	17.73	27.78	50.99	37.82	31.82	69.6	27.26	39.19
MH04g0403200	9.83	18.76	19.95	20.23	10.47	17.4	23.78	23.75	10.31	32.7	14.92	34.93
MH04g0405600	6.55	5.68	23.42	11.27	18.9	13.74	24.92	18.47	5.6	24.9	7.75	13.92
MH04g0407300	0.6	1.42	1.45	0.58	0.58	2.14	2.86	0.88	1.18	12.9	1.15	1.99
MH04g0407500	3.58	7.39	10.41	16.18	7.85	8.85	17.47	15.83	9.13	21.9	12.34	15.62
MH04g0411200	9.53	20.46	18.79	17.91	9.3	29.31	28.36	13.19	7.07	20.7	6.6	18.74
MH04g0428800	11.62	1.14	11.85	3.47	1.74	0.61	7.73	6.74	2.95	2.7	2.58	29.25
MH04g0433200	2.38	0	6.94	0.58	0	1.53	4.58	8.5	1.47	10.5	2.58	4.54
MH04g0435600	0.6	5.12	2.89	3.18	0.58	5.19	3.15	2.05	0.59	6.6	2.87	5.11
MH04g0436600	0	0	0.87	0	0.58	0	0	1.17	0	5.4	0	0
MH04g0450700	261.9	352.71	235.61	259.76	242.75	289.41	189.64	274.69	152.93	159.6	322.56	315.81
MH04g0451000	16.39	21.88	17.35	11.85	8.43	8.55	16.9	13.49	9.13	22.5	12.34	20.45
MH04g0451200	13.11	17.91	19.95	8.38	14.25	14.04	18.91	12.61	13.26	29.1	12.91	18.18
MH04g0462000	0	1.42	1.16	1.16	0	1.53	3.44	2.93	0	5.1	0.86	0.57
MH04g0462800	0	1.42	0	0.58	0	1.83	0	0.88	0	3.6	0	0
MH04g0464500	0	0	1.73	0	0	2.14	5.44	1.76	0	3.6	1.72	5.96
MH04g0464900	2.98	5.12	11.27	9.25	2.33	7.02	10.89	3.22	0.59	18.3	4.02	2.27
MH04g0472600	5.96	12.51	15.03	14.74	11.05	14.96	12.6	13.49	5.89	15.6	6.6	8.52
MH04g0485600	5.66	4.26	20.81	10.4	5.81	6.72	28.07	19.64	8.25	18.9	4.3	15.34
MH04g0486300	13.11	20.75	25.15	21.67	11.63	13.13	21.77	19.35	11.2	29.4	16.64	17.32
MH04g0490400	41.71	24.44	43.07	43.05	51.46	43.05	65.89	53.06	56.28	96.6	57.68	115.02
MH04g0492800	1.79	1.42	2.31	2.89	1.16	2.75	4.3	4.1	0.59	7.2	2.3	4.54
MH04g0493400	1.19	3.13	6.36	2.89	0.58	0	1.72	0.59	2.65	8.7	7.46	27.26
MH04g0499400	3.28	0.85	1.73	2.31	0.87	3.66	6.02	4.98	0	7.8	1.72	6.53
MH04g0503800	1.79	6.25	2.6	2.89	0.87	3.36	5.44	2.64	2.36	9.6	1.43	2.84
MH04g0507300	25.62	32.68	12.72	30.92	27.62	32.67	35.81	40.75	14.14	33.3	16.93	19.31
MH04g0507400	26.22	25.01	25.73	35.54	19.48	24.73	34.95	12.02	18.27	39.6	16.64	30.96
MH04g0515600	0	0	0	0	0	0	0	0	0	3.6	0	0
MH04g0517500	37.54	56.27	53.77	77.15	63.96	99.83	111.43	136.32	35.95	114.6	50.51	71
MH04g0519100	6.26	4.26	4.63	3.47	5.23	15.26	9.45	5.28	4.71	28.2	11.48	19.6
MH04g0519600	15.49	17.34	20.81	18.49	16.28	25.95	20.63	20.52	16.5	35.7	16.36	27.26
MH04g0531800	5.66	4.83	17.06	2.31	1.16	6.41	10.31	19.06	0.59	109.2	1.72	8.24
MH04g0540700	0.6	0.57	1.45	0	0.58	0	1.43	0.88	0.88	5.4	2.3	23
MH04g0541300	24.13	42.35	37	38.72	38.08	42.74	37.81	26.97	17.09	51	26.4	30.96
MH04g0542700	0	1.42	3.18	1.73	3.2	3.05	4.01	0.59	1.47	8.1	1.43	3.41
MH04g0554400	59.59	54.29	74.87	52.59	46.23	63.5	54.43	64.2	38.31	77.4	53.95	59.36
MH04g0555500	0	0	10.12	1.16	0	2.14	7.73	7.04	0	10.5	3.16	3.41
MH04g0556600	5.96	7.39	31.22	14.45	10.47	20.45	29.22	18.18	6.78	12.9	14.06	109.62
MH04g0558900	44.39	22.17	47.99	67.32	32.56	59.84	71.04	64.79	21.51	174.3	48.21	42.88
MH04g0559700	2.09	0.57	4.34	2.02	0.58	3.97	6.3	1.76	0	6.6	1.72	2.84
MH04g0561800	146.59	79.58	199.76	236.07	251.48	225.61	258.67	104.07	92.52	382.19	74.9	101.1
MH04g0573100	1.49	5.97	4.34	3.18	1.45	5.19	4.01	6.74	1.77	8.1	8.04	7.38
MH04g0573300	1.19	0.57	2.31	0	1.74	1.53	1.15	1.76	1.18	2.7	2.01	8.24
MH04g0578200	0.89	0	8.09	1.16	0.87	1.83	4.01	12.61	0	9.9	0.57	0.57
MH04g0590800	0.89	2.84	3.47	0.87	0.58	0.61	0.86	0.88	0	11.7	2.01	4.83
MH04g0592500	0.6	3.98	6.65	6.93	1.74	7.02	8.31	7.92	0.59	10.8	0.86	2.56
MH04g0596900	14	1.14	1.16	2.31	3.2	1.83	8.31	9.09	14.73	1.8	13.2	39.19
MH04g0597500	0	0	24.86	1.44	4.65	0.92	0.57	9.38	5.6	0.6	30.13	35.5
MH04g0598400	6.55	1.99	5.2	7.22	9.01	5.5	9.45	9.67	7.07	13.5	18.65	30.1
MH04g0598800	7.75	1.42	6.07	8.09	34.01	15.57	9.17	0	4.71	15.9	0.57	3.69
MH04g0612200	17.58	32.4	13.59	19.36	17.15	27.48	24.64	36.35	7.07	42.6	8.61	15.34
MH04g0614100	1.79	3.69	8.96	2.89	3.78	5.8	7.16	11.73	1.47	12.3	7.17	10.79
MH04g0618000	1.49	0.57	7.23	6.65	7.85	3.36	5.16	4.69	2.36	1.8	10.91	16.76
MH04g0618500	12.51	8.53	20.81	14.16	16.86	19.84	23.78	14.36	9.13	21.6	8.9	9.37
MH04g0618600	2.38	3.98	8.09	10.98	4.36	11.6	16.9	5.86	2.95	25.8	2.87	6.82
MH04g0619100	46.18	42.06	63.89	65.01	36.92	66.25	89.09	61.86	42.73	92.1	43.91	50.27
MH04g0620600	1.79	2.27	2.31	1.44	1.16	1.53	2.86	2.93	1.47	0.6	4.3	8.24
MH04g0620900	62.87	53.15	59.26	61.26	56.11	51.29	75.91	68.6	56.87	114.3	35.87	63.33
MH04g0622300	8.34	9.95	16.48	8.96	12.79	20.45	20.34	10.55	8.55	39	7.46	9.37
MH04g0623600	33.67	47.18	139.92	146.21	65.41	86.09	161.56	97.33	39.48	101.7	58.54	67.31
MH04g0623800	9.24	16.2	29.78	36.98	15.7	19.84	32.94	19.35	11.2	40.8	14.35	13.35
MH04g0624400	0.89	5.97	66.78	5.49	6.4	194.77	19.19	6.74	1.47	12.6	2.3	131.77
MH04g0625200	106.37	87.82	56.66	60.68	56.98	68.08	57.86	58.92	47.44	58.8	125.7	120.98
MH04g0626800	6.85	11.94	16.48	8.09	4.94	10.99	6.59	29.02	7.37	66.6	11.77	11.36
MH04g0627400	0	0.57	0.58	0	0	0.92	1.15	0	0	5.1	0.57	0.57
MH04g0627600	13.11	14.21	11.85	7.8	9.59	12.82	12.03	16.71	7.96	20.4	13.49	11.08
MH04g0629900	17.88	11.94	21.1	10.69	9.88	15.26	20.34	35.47	11.79	27.6	14.35	15.62
MH04g0631200	28.31	28.71	39.89	43.92	28.78	33.28	41.82	34.59	29.17	63.9	28.12	30.1
MH04g0632300	22.64	25.86	60.71	64.72	37.5	49.46	75.34	52.77	33.89	138	36.73	48
MH04g0638500	17.58	30.13	26.31	20.23	12.5	18.01	23.78	22.57	18.86	41.7	18.37	21.3
MH04g0641000	11.02	13.64	27.17	26.87	18.32	35.72	44.69	19.35	14.73	41.1	16.07	19.03
MH04g0641200	2.68	8.24	28.33	21.96	2.04	7.33	14.9	22.87	2.65	15.9	11.19	14.2
MH04g0641800	13.41	11.65	23.71	23.69	16.57	27.48	22.63	13.78	12.67	32.1	11.77	13.35
MH04g0642300	11.62	7.11	10.99	8.96	9.3	10.69	19.77	12.31	19.45	16.5	17.79	50.27
MH04g0643200	0.6	4.83	5.49	4.91	0.58	2.14	5.16	1.76	0	6.3	1.15	2.27
MH04g0645600	32.18	49.74	91.35	42.19	49.71	91.28	107.71	133.68	35.06	130.5	84.08	71.28
MH04g0645800	0	1.42	0.58	0.58	0	2.75	4.01	2.93	0	20.4	0.57	3.98
MH04g0646000	30.99	54	17.63	15.03	27.91	32.06	33.52	10.85	9.13	126.6	8.9	7.1
MH04g0654300	7.75	17.91	20.81	18.49	14.25	21.37	26.07	17	11.2	24.3	16.64	6.25
MH04g0656500	28.31	44.05	55.79	35.83	31.11	47.32	73.62	89.41	31.82	97.2	49.36	118.43
MH04g0656600	0	0	1.16	1.16	0	5.8	4.58	1.76	0	8.1	1.43	5.68
MH04g0657100	11.02	21.32	35.85	19.94	30.24	16.18	26.64	23.45	12.08	41.7	21.24	38.62
MH04g0658900	7.75	14.78	20.81	33.81	12.5	22.29	23.78	10.55	6.19	22.5	15.78	19.03
MH04g0662200	2.38	1.14	4.05	8.67	4.07	2.44	11.17	51.89	13.85	0.9	61.13	275.48
MH04g0665300	79.55	112.83	52.61	89.57	72.39	143.79	113.72	128.7	121.99	212.4	300.75	269.51
MH04g0665700	10.43	8.81	11.85	13	4.94	7.33	10.89	14.95	7.07	24.3	11.19	8.24
MH04g0666800	0	0	0	0	0	0.61	0	1.76	0	0	7.17	3.69
MH04g0667900	0.6	1.71	4.05	0.87	0.58	3.36	2.58	0.59	1.47	9	0.86	0
MH04g0668900	2.38	5.97	5.78	3.76	3.2	3.36	3.44	4.1	1.77	11.1	2.58	6.82
MH04g0670300	2.09	7.67	26.02	15.89	13.66	14.04	19.77	19.93	8.25	20.4	20.38	12.21
MH04g0671800	0.6	0	0	2.31	0	0.61	0	1.76	2.95	7.2	35.3	58.5
MH04g0678400	71.81	46.33	73.43	92.46	70.36	75.41	99.97	70.94	64.53	174.3	47.93	58.79
MH04g0678800	3.87	3.69	3.47	4.33	1.74	2.14	2.86	4.69	0.88	6.3	1.15	1.7
MH04g0681000	2.98	2.84	6.07	2.31	3.49	10.38	12.32	7.92	4.42	13.5	15.5	19.31
MH04g0681100	16.39	18.47	9.25	6.36	9.88	22.29	20.05	39.28	7.37	37.5	30.42	93.15
MH04g0684800	11.62	6.54	14.17	10.69	10.76	8.85	13.75	13.78	4.71	12.9	9.47	15.05
MH04g0684900	0	0.85	0.58	0	0	0.92	2.86	2.93	0	7.2	0.86	1.14
MH04g0701700	30.39	41.21	74.87	44.5	47.39	42.13	48.13	35.77	35.65	78.9	51.08	39.19
MH04g0704000	3.87	3.41	4.34	4.91	2.33	1.53	1.15	4.69	3.83	5.4	7.75	12.5
MH04g0705600	39.03	19.9	9.83	18.2	3.78	13.13	8.31	13.78	2.65	2.4	31.28	22.44
MH04g0707300	10.73	21.88	11.27	10.69	6.69	9.16	8.59	12.61	17.68	7.2	28.98	37.2
MH05g0010100	0	1.14	2.89	2.31	0	1.22	2.01	0.88	0	3.6	0.57	0.85
MH05g0011500	19.37	10.52	14.45	22.25	18.32	19.23	30.94	16.12	8.84	37.2	10.33	17.61
MH05g0013300	2.38	3.41	3.47	3.18	1.16	3.97	1.72	4.1	4.42	3	12.91	18.74
MH05g0018100	0.89	2.27	0.58	1.44	2.62	2.75	1.43	1.47	0	5.4	1.43	1.14
MH05g0018600	18.17	12.22	21.1	16.18	13.37	18.32	13.75	12.02	8.55	19.5	10.62	12.5
MH05g0018700	23.54	28.42	51.17	39.3	23.84	43.05	48.98	61.86	24.46	58.2	33.29	52.26
MH05g0018800	3.28	5.68	6.07	3.18	0.87	1.53	12.03	15.24	2.36	16.2	7.17	16.76
MH05g0021400	9.83	8.53	11.85	9.54	6.11	11.3	10.89	9.97	6.48	20.4	6.31	9.09
MH05g0034700	0.89	1.99	2.6	1.44	0	2.44	5.16	4.1	0	9.3	0.86	5.11
MH05g0040400	13.71	16.2	17.92	29.76	4.07	11.6	10.31	9.67	8.55	25.8	9.18	13.63
MH05g0042600	5.07	4.55	2.31	0.87	4.36	5.19	4.87	6.45	5.01	14.7	4.3	3.69
MH05g0046100	24.43	28.14	23.13	31.49	39.83	49.76	67.03	49.54	35.06	76.8	33	52.54
MH05g0047100	5.96	7.67	11.27	17.91	8.43	14.35	15.76	10.55	6.19	20.1	6.6	10.22
MH05g0048900	15.2	25.01	29.49	21.96	24.71	17.4	32.37	26.09	15.03	49.8	16.36	22.44
MH05g0049700	0	0.57	1.45	0	0	0	0.57	0	0	0	1.43	4.26
MH05g0052900	0.6	0	2.89	1.44	0	0	3.72	4.4	0	3.6	4.59	5.96
MH05g0053100	14	18.76	22.55	22.25	7.56	16.49	21.48	19.93	13.55	43.8	19.23	14.48
MH05g0053200	2.09	1.99	2.89	2.02	0.87	2.44	0.86	2.05	0.59	7.8	3.16	7.95
MH05g0060000	5.96	10.52	11.85	6.07	13.66	26.87	17.47	13.19	8.25	33.6	8.9	4.83
MH05g0060700	5.07	5.97	6.94	3.76	3.78	4.58	7.73	3.81	1.77	7.8	4.59	6.53
MH05g0061900	2.38	6.82	15.61	10.4	2.04	7.33	16.04	13.49	2.95	13.8	4.02	4.54
MH05g0063200	7.15	1.14	3.18	4.05	12.21	6.11	11.46	6.45	10.9	4.5	24.11	42.03
MH05g0063600	0	0	0.58	2.31	0	0	0	0	0	0.6	12.34	117.86
MH05g0064400	278.28	205.2	199.47	264.38	157.57	130.97	237.76	168.86	131.71	388.19	116.23	169.83
MH05g0084400	39.63	64.52	97.42	72.81	47.68	71.74	76.77	81.2	27.11	74.7	69.45	67.31
MH05g0092500	19.37	24.16	37.58	17.63	4.07	12.21	12.32	19.06	17.68	56.4	24.11	71
MH05g0098700	109.65	75.03	61.29	71.66	173.85	124.25	77.63	36.94	84.57	174	38.45	31.81
MH05g0118200	2.09	6.54	13.88	6.07	0	0	0	0	0	7.2	3.44	5.68
MH05g0129900	56.31	69.06	78.05	79.17	57.56	81.51	94.24	75.93	64.24	174.9	51.94	30.39
MH05g0130800	13.11	11.65	23.99	17.63	4.65	9.16	12.03	12.02	11.2	40.2	8.04	5.68
MH05g0158100	103.69	26.72	88.17	22.25	15.41	2.75	3.15	14.66	24.46	59.7	43.05	144.55
MH05g0186700	11.92	10.8	21.39	19.94	12.5	3.97	22.63	7.33	11.2	38.4	13.77	17.89
MH05g0210700	1.19	1.14	1.73	0.87	0	0.61	0.57	1.47	0.59	1.5	1.43	6.25
MH05g0214300	11.02	15.35	9.83	7.51	7.85	11.3	11.17	16.12	11.49	10.8	18.08	23.57
MH05g0230800	19.07	24.73	23.13	28.32	27.62	36.33	45.26	40.75	19.45	47.1	22.67	31.24
MH05g0231000	2.98	3.98	6.65	10.98	21.51	10.99	10.31	0	1.77	17.1	2.3	1.99
MH05g0254900	14.9	15.35	29.78	24.85	25	23.2	36.67	24.04	17.68	36	21.24	30.39
MH05g0255200	74.19	21.88	24.28	36.7	50.3	35.41	33.8	53.65	57.16	20.4	78.63	136.03
MH05g0256500	32.77	15.92	30.07	42.76	76.46	38.47	45.26	3.52	16.21	60.6	18.08	14.2
MH05g0257500	0	0	0	0	0	0	0	0	0	0	0	3.69
MH05g0262700	5.66	3.41	7.52	2.02	6.11	9.77	7.45	4.69	4.42	25.8	3.16	5.4
MH05g0266100	21.75	23.87	41.63	37.56	31.69	34.5	41.25	28.14	23.87	50.7	33.58	32.09
MH05g0268700	5.07	10.8	12.72	9.54	8.72	3.97	9.17	11.14	5.89	7.8	8.9	15.62
MH05g0282300	1.79	4.26	8.96	7.51	2.91	4.58	6.88	4.98	2.65	23.1	6.03	6.25
MH05g0284600	2.38	1.42	0.87	0.58	0	0.92	6.88	6.74	1.18	24.3	6.03	12.21
MH05g0286300	6.85	1.99	9.83	10.98	9.59	9.16	10.6	4.69	5.89	17.7	6.31	5.96
MH05g0306400	40.82	60.54	52.32	27.45	16.57	32.97	41.25	52.18	33	111.3	43.33	93.72
MH05g0321400	70.91	62.24	51.17	54.32	37.79	39.08	47.27	42.21	36.54	98.1	36.45	61.06
MH05g0334800	1.49	0.85	1.45	6.36	4.07	0.92	1.15	1.76	1.18	3.3	5.45	10.22
MH05g0336700	8.34	5.12	12.14	17.34	7.27	16.79	17.19	16.12	7.07	17.7	9.47	11.64
MH05g0347400	35.46	24.73	37.29	31.49	33.43	42.44	39.24	27.26	23.57	61.2	32.43	29.54
MH05g0361700	0	0	1.45	1.73	0	1.22	4.58	4.1	0	16.5	0.57	1.42
MH05g0368600	15.79	24.44	37.29	25.72	22.1	23.2	31.22	15.54	13.55	37.5	22.38	14.48
MH05g0368900	0	1.14	1.73	1.73	0	1.83	0.86	2.93	0	10.5	2.01	2.84
MH05g0370500	84.92	67.93	110.14	78.88	93.9	107.46	118.88	49.84	66.3	209.1	56.25	85.48
MH05g0373700	0.6	2.56	4.91	5.2	3.49	6.72	4.58	4.69	0.59	8.1	1.72	3.12
MH05g0374600	0	0	0	2.31	0	0	0.57	1.17	0	0	3.73	3.98
MH05g0377300	7.75	67.64	14.17	20.8	25	51.29	20.34	23.75	37.72	4.8	76.62	32.38
MH05g0380800	10.43	9.66	6.07	13	4.94	7.02	9.74	10.55	8.25	4.2	10.33	19.31
MH05g0381700	8.34	10.23	15.9	16.18	8.43	11.6	20.63	14.36	8.84	33	9.47	19.31
MH05g0381900	19.96	9.38	29.2	17.63	50	26.56	31.51	38.99	23.57	26.1	37.88	49.13
MH05g0384400	31.88	29.84	25.73	28.32	21.8	30.83	33.8	27.56	24.46	54	26.11	24.42
MH05g0385700	25.62	21.6	45.96	42.19	25	47.32	50.42	26.68	17.39	67.2	17.79	27.83
MH05g0385900	16.69	23.02	60.42	46.23	47.1	51.59	59.3	35.18	23.28	100.2	37.59	68.44
MH05g0386100	5.07	6.54	11.56	7.22	4.36	10.38	14.9	6.16	0.88	18.6	4.59	3.98
MH05g0386200	29.79	26.43	35.27	20.51	28.2	35.41	38.39	38.4	16.21	43.8	15.21	28.4
MH05g0387900	21.15	4.83	1.16	5.78	8.43	3.05	4.01	11.14	8.84	4.5	13.49	36.07
MH05g0399700	1.19	0.85	0.58	0	0	0.61	1.15	0.59	0	93.3	1.15	0
MH05g0408300	8.64	9.95	13.3	7.8	4.36	7.94	13.75	10.85	4.13	21.9	6.03	4.26
MH05g0411000	2.68	1.42	3.76	4.62	0.58	3.36	2.58	6.45	1.18	7.2	2.3	0.85
MH05g0416800	16.39	23.87	35.27	23.98	17.73	24.12	28.07	23.16	11.79	35.4	21.81	17.32
MH05g0418900	6.55	11.94	8.67	9.54	7.85	10.38	11.74	4.98	3.83	12	4.59	7.67
MH05g0420300	0	0.57	1.73	0.58	0	0.92	1.15	1.17	1.18	6.9	1.15	0.85
MH05g0427800	0	2.27	5.49	2.89	0.58	3.36	8.88	7.04	0	12	1.15	1.99
MH05g0430600	14.3	16.77	21.1	14.16	11.92	18.01	24.06	38.11	15.32	31.2	19.8	46.01
MH05g0430900	6.55	16.2	8.67	7.51	6.11	11.3	17.76	21.99	7.07	45.9	16.36	10.22
MH05g0436400	44.1	57.7	39.89	29.18	33.14	25.03	28.65	51.6	20.63	31.8	43.62	40.33
MH05g0436700	1.49	0	0.87	0	0	2.75	0	1.76	0	5.7	2.3	1.42
MH05g0438000	1.79	1.14	6.94	1.16	0.87	1.22	3.44	5.28	1.18	7.2	2.58	4.26
MH05g0438500	43.2	44.62	60.13	56.92	22.39	29.31	64.17	55.11	27.7	61.8	37.31	37.49
MH05g0438600	2.98	6.82	9.25	10.11	3.2	9.16	12.03	7.62	4.13	13.2	6.89	4.83
MH05g0449600	41.41	31.83	21.97	21.96	43.32	24.42	20.63	31.37	37.42	36.6	35.01	90.6
MH05g0449700	3.58	2.84	1.16	1.44	0.58	2.14	4.58	7.33	2.36	15.3	6.6	19.6
MH05g0459300	0.6	1.14	0.87	1.16	1.45	0.61	0.57	1.47	0	0.6	4.3	1.42
MH05g0463200	0.6	0	4.05	0.87	0	2.75	4.01	1.76	0	2.7	2.58	9.09
MH05g0463700	0	0.57	4.91	1.73	0	0	5.44	3.22	0	1.8	1.15	10.22
MH05g0464100	22.94	16.77	31.22	30.34	24.42	34.5	42.97	42.8	21.22	74.4	16.07	35.5
MH05g0464500	75.98	84.41	72.56	59.81	42.16	52.51	65.31	58.63	57.46	124.5	54.81	84.06
MH05g0465000	0.6	1.14	0.58	0	1.16	0.92	2.58	0.59	0	14.7	0.57	1.99
MH05g0466200	3.87	5.12	3.18	0	0	1.22	3.44	2.64	2.36	2.7	3.73	10.51
MH05g0467300	9.53	14.21	25.15	13.29	14.83	26.87	28.36	15.54	14.44	40.2	16.64	14.2
MH05g0470500	85.21	84.7	93.95	126.85	90.12	87.31	75.91	97.62	62.47	36.3	162.72	112.46
MH05g0480900	29.5	37.52	61.86	44.79	34.89	44.88	54.71	56.29	35.65	74.7	40.46	53.39
MH05g0481800	0.6	0	0.87	2.02	1.74	0.61	2.29	0.88	1.77	0.9	3.16	8.24
MH05g0483500	30.99	32.68	44.52	51.14	41.28	47.93	51.28	60.98	27.7	58.8	25.54	25.56
MH05g0495200	0.6	1.42	1.45	1.44	0.58	0	2.01	0	0	0.9	0.57	3.69
MH05g0496300	2.68	6.54	8.96	6.36	5.23	10.07	12.89	9.38	4.13	27	2.58	7.38
MH05g0498100	2.68	5.97	7.52	4.33	1.16	1.53	4.58	0.59	2.95	11.7	5.45	7.38
MH05g0498300	2.09	3.69	8.38	8.09	8.14	6.11	13.75	9.97	4.13	12	4.3	6.25
MH05g0498500	0.6	4.83	6.36	5.78	1.74	5.5	6.02	6.16	1.18	7.2	6.03	3.98
MH05g0501400	151.66	66.51	107.54	132.05	103.79	133.41	137.5	104.66	81.03	328.19	96.71	121.55
MH05g0505200	32.48	45.76	113.03	91.02	73.55	89.45	103.13	78.27	38.31	149.1	64.57	56.8
MH05g0506100	4.47	3.69	8.09	2.6	3.2	9.16	10.6	4.4	3.24	19.8	6.89	4.26
MH05g0510300	149.87	122.5	150.33	211.8	152.34	158.14	307.94	211.37	124.64	262.49	132.01	180.62
MH05g0511500	3.58	7.96	36.43	21.96	7.27	14.04	13.75	18.47	11.2	24.3	13.2	10.51
MH05g0522000	11.62	15.63	17.92	9.25	3.49	9.16	20.05	16.12	7.37	53.7	39.32	51.69
MH05g0525000	26.22	28.99	50.59	20.8	44.48	56.48	36.38	34.59	24.46	55.2	52.8	45.16
MH05g0528800	0.6	1.42	0.58	0	0	1.22	0.86	1.47	0	3.6	0	0.57
MH05g0532100	34.26	26.72	45.68	38.14	48.26	47.01	60.73	63.91	31.23	51.3	37.88	69.86
MH05g0536400	11.02	11.37	23.13	14.74	11.05	5.8	15.47	12.31	13.55	14.1	14.92	42.03
MH05g0540400	2.09	3.98	12.43	2.6	3.78	3.36	4.01	2.93	1.18	8.4	3.16	3.12
MH05g0544700	0	0.57	1.16	1.73	1.45	2.44	3.72	2.35	0	6.3	1.43	1.42
MH05g0545200	7.15	11.65	12.72	9.25	9.88	19.23	20.91	12.9	7.07	18.3	12.34	16.19
MH05g0547100	0	0.57	0	1.16	0.58	1.22	0	0	0	3.6	0.86	0
MH05g0547900	7.75	5.97	5.78	3.47	7.85	3.36	2.86	7.62	13.55	6.6	20.09	30.1
MH05g0548300	8.64	11.08	14.17	11.56	7.27	8.24	15.76	8.79	6.78	11.4	16.64	19.88
MH05g0549800	6.55	9.95	13.59	18.49	8.14	14.35	16.9	10.85	7.96	20.7	8.32	9.66
MH05g0560400	21.15	29.84	55.5	55.19	30.53	54.34	51.85	22.87	18.86	69.6	33.86	35.5
MH05g0566300	0.6	1.14	4.91	3.76	2.04	2.14	1.43	2.93	0.59	6.9	3.16	11.36
MH05g0570400	43.2	33.82	43.07	49.41	38.08	50.37	51.85	35.18	34.18	83.7	30.71	40.61
MH06g0012300	11.62	13.07	22.84	16.47	22.97	18.01	18.62	15.54	10.02	34.8	12.63	19.6
MH06g0012400	44.1	44.34	96.84	60.39	40.12	65.64	95.39	82.96	76.61	162.6	63.71	114.74
MH06g0014400	3.87	5.4	8.96	8.96	3.49	9.46	12.89	6.74	5.6	14.4	3.44	9.94
MH06g0015300	40.82	34.39	36.43	49.12	113.38	65.33	52.14	67.72	36.54	9.9	74.9	37.77
MH06g0021800	3.58	4.26	4.63	4.33	2.04	4.27	3.44	6.74	0.88	3.9	3.44	6.82
MH06g0022900	5.07	5.12	10.7	10.98	4.07	11.3	15.76	17	5.6	18.3	7.46	9.66
MH06g0041800	7.45	2.27	4.63	3.76	0.58	4.27	10.31	6.45	2.06	41.4	3.44	4.54
MH06g0042300	0	0	0	0	0	1.83	0.86	0.59	0	4.5	0.57	0
MH06g0049100	13.11	13.36	12.43	15.03	10.18	8.55	18.05	9.97	10.31	23.1	8.32	14.2
MH06g0050900	7.45	3.69	4.91	4.05	5.52	5.19	10.03	9.09	2.36	12.6	3.44	7.38
MH06g0059700	19.66	22.17	27.46	24.56	12.5	16.18	24.92	26.38	10.9	40.5	14.64	13.06
MH06g0060000	17.28	9.95	20.81	21.67	40.99	27.48	30.08	30.2	15.32	45	17.22	24.71
MH06g0073800	14.3	15.63	25.15	22.25	45.93	30.83	32.94	21.69	14.44	33.9	20.66	22.44
MH06g0075200	2.98	3.41	4.63	7.22	0.87	6.11	10.03	15.24	2.06	11.4	1.72	7.67
MH06g0075500	0.6	0	0	0.58	0	0	0.57	0	0	3.9	0.86	0
MH06g0079900	6.55	8.53	13.59	16.76	11.05	17.4	16.04	14.36	6.48	24	9.47	11.08
MH06g0082800	55.12	58.26	69.38	73.39	34.31	56.48	74.77	82.38	38.31	87.9	45.92	43.74
MH06g0084900	20.26	32.4	25.44	44.5	26.17	26.56	23.2	29.9	11.2	15.9	31.85	24.14
MH06g0085000	19.07	23.59	4.34	28.32	92.45	27.17	113.72	82.96	16.8	179.1	6.6	32.09
MH06g0085500	291.99	263.18	227.51	239.25	227.64	229.88	311.95	229.54	251.94	604.79	206.05	252.47
MH06g0086400	22.35	22.17	28.91	20.23	15.12	27.78	27.21	17.88	13.26	36	19.8	24.14
MH06g0090800	16.69	11.37	13.88	12.71	9.88	16.18	20.91	16.71	23.87	51.6	11.19	14.77
MH06g0093800	60.78	36.66	65.33	65.88	55.82	52.2	66.46	31.37	41.84	97.8	28.7	32.38
MH06g0099300	16.98	27	44.52	31.21	32.56	40.91	49.84	44.85	26.23	80.4	28.41	51.97
MH06g0101600	8.04	6.82	9.25	10.69	7.27	11.3	15.18	8.79	3.54	25.2	7.17	13.35
MH06g0102200	10.43	9.09	17.92	14.74	13.37	23.2	22.63	14.07	6.19	49.2	8.32	11.93
MH06g0106200	0.89	2.27	2.89	2.02	3.49	1.83	1.43	0	0	3	4.59	2.56
MH06g0120200	0.89	4.26	1.73	1.16	2.04	5.19	3.72	2.64	0	9.6	0	0
MH06g0122300	2.68	6.82	6.07	2.31	0	0	0	0	0	4.8	2.3	3.69
MH06g0123400	34.26	21.03	44.23	29.76	37.21	47.32	51.56	25.21	10.31	19.2	42.19	48.85
MH06g0127500	9.83	2.56	10.7	3.18	2.04	2.14	5.44	10.26	7.37	17.4	7.17	14.48
MH06g0129600	8.04	6.54	13.88	10.69	6.4	4.88	12.03	6.74	5.3	19.5	7.17	9.09
MH06g0133700	10.73	14.21	16.19	6.07	9.59	9.16	10.6	10.85	9.43	20.7	8.61	16.76
MH06g0134100	5.36	9.95	6.65	6.65	2.33	8.85	8.88	4.69	3.24	11.1	6.03	7.95
MH06g0134500	0.6	0.57	5.49	2.02	0	3.05	2.86	4.69	0	4.2	1.72	3.12
MH06g0134900	5.07	3.69	6.94	2.89	3.2	3.36	4.87	4.1	1.47	12.9	2.3	5.68
MH06g0135000	4.47	4.26	6.07	5.49	5.23	5.8	5.44	4.69	1.77	13.2	2.3	4.54
MH06g0146900	0	0.57	0.58	0.87	0.58	5.19	1.72	2.05	0	13.2	0.57	0.57
MH06g0147100	2.09	7.39	13.88	11.85	10.47	12.82	18.91	12.61	5.3	16.8	5.74	4.54
MH06g0148600	4.77	13.64	12.14	10.11	5.52	8.55	10.89	16.42	4.42	4.2	21.81	21.02
MH06g0149200	4.47	3.69	10.41	3.76	3.78	5.19	6.02	5.86	7.66	8.7	15.5	26.41
MH06g0153600	2.38	3.13	3.76	1.44	0	2.75	3.72	2.05	0.59	6.6	6.03	4.83
MH06g0156800	0	0	0.58	0.58	0	0.61	0	0	0	4.8	0.57	0
MH06g0157100	26.82	15.92	26.02	31.78	32.56	83.65	58.44	43.39	6.48	107.7	16.93	20.73
MH06g0157300	0	0	0.87	0.58	0.58	1.83	1.43	2.93	0	3.6	1.43	0.57
MH06g0158400	31.58	8.24	20.81	22.54	45.06	31.75	28.36	8.79	19.74	48	16.07	21.3
MH06g0160100	16.98	21.03	17.63	14.74	10.18	12.82	11.46	19.64	7.96	22.8	14.06	12.78
MH06g0160700	1.19	1.42	6.65	2.31	1.45	4.58	4.01	1.47	0	4.8	1.72	1.14
MH06g0163000	0	0	1.73	0.87	2.33	3.66	0.57	0	0	4.5	0.86	1.14
MH06g0163500	17.88	20.75	24.28	11.56	9.01	25.64	47.84	10.85	7.37	73.2	14.64	23
MH06g0163700	1.19	1.71	2.6	1.44	2.04	4.88	4.87	4.1	0.88	3.9	4.02	6.25
MH06g0164300	1.19	3.98	2.6	2.02	0	1.53	8.02	7.33	0	5.1	2.3	2.56
MH06g0167800	19.07	15.35	23.13	22.83	23.26	29.92	26.64	12.31	15.32	42	11.19	15.9
MH06g0169600	534.22	455.6	1201.16	1058.4	479.7	619.13	1083.1	829.64	381.29	1044.88	559.32	696.08
MH06g0172400	0	0	0	0	0	0	0.57	1.76	0	4.8	0	0.85
MH06g0173400	14.3	20.18	53.19	23.12	15.41	16.49	14.04	34.01	11.49	32.7	11.48	22.72
MH06g0199300	14.3	11.65	14.17	18.78	12.21	14.96	12.32	9.97	7.37	37.5	6.6	8.24
MH06g0223200	1.19	2.56	2.02	0.87	3.49	1.83	5.44	0.59	0	5.4	0	3.12
MH06g0228000	7.45	11.65	13.3	15.03	15.99	11.91	15.18	24.63	9.72	7.8	22.67	23
MH06g0235700	0	0	1.45	0	0	0	0	1.47	1.18	12.9	2.87	2.56
MH06g0268700	4.47	1.99	6.36	3.76	2.04	7.02	12.32	12.31	7.66	20.7	8.61	14.77
MH06g0280400	6.26	6.25	8.67	5.78	6.4	3.66	12.32	8.21	8.25	11.4	15.5	25.56
MH06g0285800	19.37	24.16	35.85	34.67	26.75	28.09	34.09	26.09	24.16	56.4	20.38	20.73
MH06g0354500	19.37	22.45	33.53	56.92	15.12	18.32	19.48	24.04	23.87	10.2	49.65	67.88
MH06g0361500	16.98	11.37	13.3	4.91	6.69	5.8	7.73	15.83	7.96	22.2	11.48	9.66
MH06g0380700	5.96	5.97	13.01	11.56	6.69	17.4	13.18	10.55	2.06	22.5	8.9	15.34
MH06g0458500	0.89	2.27	1.73	2.31	0.87	3.97	2.01	0.88	0	4.2	0	0.85
MH06g0464700	16.98	13.36	13.88	9.82	23.84	21.06	13.75	35.47	13.55	59.7	18.94	16.76
MH06g0474000	8.94	8.24	8.38	2.02	0.58	1.53	4.58	6.45	8.84	59.1	24.39	29.54
MH06g0483500	1.49	0.85	0	0.87	1.74	1.22	0	0	0	3.6	1.15	1.14
MH06g0492400	0	0.85	0.58	0	0	0.61	5.16	4.69	0	11.7	1.15	1.42
MH06g0493000	0	0	0	0	1.45	0	0	0	0	0	0.57	5.4
MH06g0493700	1.79	7.39	10.41	3.18	4.36	4.88	7.73	3.52	2.95	21	2.3	4.54
MH06g0506200	6.55	7.39	10.41	6.36	6.69	8.85	11.46	10.55	2.95	13.2	3.44	6.53
MH06g0507100	23.24	10.23	26.02	17.91	20.64	22.59	31.22	15.24	15.62	34.8	20.66	22.72
MH06g0508700	3.58	5.12	6.36	3.76	1.45	7.63	6.3	5.57	1.18	6.3	11.19	10.79
MH06g0527700	0.6	0	0.58	0	0	0	0	1.17	1.47	1.5	11.19	0.57
MH06g0530400	8.34	11.65	19.66	41.32	25.29	21.98	26.07	14.66	13.85	37.2	23.82	48.85
MH06g0531800	8.64	13.07	76.03	45.65	8.72	3.97	25.21	12.31	11.49	39.9	57.4	157.62
MH06g0556000	1.19	1.42	3.47	4.33	0.58	3.36	6.02	11.73	0	3.9	0.86	8.24
MH06g0567700	1.49	5.4	2.31	3.76	0.58	4.27	6.3	5.28	1.47	11.7	4.88	3.41
MH06g0571700	2.09	5.12	3.18	2.02	4.36	5.5	5.73	10.85	2.06	12.3	6.03	9.09
MH06g0573200	0	0.85	0.58	0.87	0.87	1.53	1.72	0.88	0	5.1	0.57	1.14
MH06g0573400	1.49	2.84	2.02	0	3.78	3.05	8.02	5.57	0	3.3	2.01	3.98
MH06g0574300	34.86	92.09	26.31	98.24	29.94	20.76	31.51	117.56	19.45	17.1	45.63	30.1
MH06g0574700	1.19	1.99	3.47	3.47	2.62	0.61	1.72	2.64	1.47	0	8.04	0.85
MH06g0576900	30.39	34.11	61	36.41	37.5	73.27	67.6	54.82	43.9	125.1	35.3	52.82
MH06g0577600	3.87	5.68	11.56	13	4.07	7.63	15.76	11.43	4.71	31.2	7.17	13.06
MH06g0580100	11.62	21.32	19.37	26.29	10.76	16.49	18.05	15.54	8.55	21.9	8.04	12.78
MH06g0583000	2.68	0.57	5.2	2.6	2.04	0.61	7.16	2.64	1.18	0	5.17	15.62
MH06g0583400	0.6	1.71	3.18	3.47	3.2	3.97	6.88	2.64	0.59	5.4	1.43	4.54
MH06g0591500	41.12	37.52	64.76	78.01	57.56	68.38	90.23	59.22	48.62	98.7	34.15	64.18
MH06g0615200	8.34	19.9	14.45	11.27	9.3	7.63	10.89	13.78	7.66	14.4	15.21	19.03
MH06g0616300	2.98	3.69	2.6	3.76	1.74	3.05	8.59	2.93	0.88	8.4	1.43	2.27
MH06g0617800	8.04	11.37	11.56	16.18	17.73	22.59	35.23	17.3	11.49	23.7	16.93	24.71
MH06g0620500	1.79	1.42	4.63	2.02	0	3.05	5.16	3.81	0.59	9.3	1.43	0.57
MH06g0621000	13.71	10.23	12.72	9.82	11.34	12.21	20.63	17	6.48	25.5	10.04	21.58
MH06g0621600	12.51	7.39	11.27	12.14	7.27	13.74	10.03	4.69	8.84	23.4	7.17	7.67
MH06g0621800	24.43	18.47	19.95	25.14	15.7	19.54	22.34	21.99	9.13	23.7	9.47	8.52
MH06g0624300	27.11	28.14	38.74	38.14	23.55	34.5	45.26	48.37	22.69	63	31.57	34.65
MH06g0625000	13.71	12.51	12.43	17.91	1.16	3.97	7.73	3.52	5.01	26.4	5.74	4.54
MH06g0640700	19.07	25.86	34.4	22.83	56.11	44.57	90.81	69.48	18.56	76.5	52.8	88.61
MH06g0640800	2.68	3.41	2.89	2.02	2.04	2.75	3.15	2.93	1.18	9	1.15	2.84
MH06g0641300	8.04	3.41	6.94	5.49	7.56	8.24	11.17	17	3.54	11.1	7.17	11.36
MH06g0643100	14	17.05	17.06	15.89	11.92	21.98	20.34	12.31	7.37	23.1	11.19	10.79
MH06g0643400	8.34	16.77	25.15	21.09	9.3	19.84	30.08	16.42	7.37	21	6.31	6.53
MH06g0658400	2.38	5.4	6.36	6.07	4.65	3.36	5.44	3.81	1.77	9.9	10.91	6.53
MH06g0658500	2.38	4.55	6.36	2.89	1.45	1.53	1.15	18.18	0	8.1	4.02	6.82
MH06g0659400	0	1.14	2.6	0.58	0	1.83	6.3	7.04	0.59	8.1	1.72	3.12
MH06g0663200	6.55	8.53	14.74	8.96	4.94	13.13	21.2	22.28	9.43	30.3	10.91	16.76
MH06g0668600	13.71	14.21	14.45	15.6	7.85	10.07	11.46	12.61	10.02	26.1	10.33	14.48
MH06g0673300	19.66	29.27	41.34	27.74	25.58	26.25	46.12	38.7	18.27	43.5	34.15	41.46
MH06g0674800	6.55	5.97	9.54	4.05	10.18	12.82	7.16	4.4	5.3	18.9	7.17	7.67
MH06g0682100	8.04	13.93	15.9	10.11	9.3	7.63	10.03	26.68	9.13	6	38.74	69.3
MH06g0682600	0	1.42	6.07	1.73	0.58	2.75	3.15	7.62	0	4.5	2.87	2.84
MH06g0683100	10.73	9.66	11.27	14.74	12.21	6.41	14.9	14.07	7.07	9	11.77	24.71
MH06g0683300	44.99	37.52	87.88	59.23	37.79	62.58	71.33	54.23	26.81	127.8	52.8	85.2
MH06g0685400	16.09	10.52	16.48	11.85	5.81	11.91	12.89	18.76	10.02	25.2	21.52	30.1
MH06g0689400	0.89	4.26	3.47	3.47	1.45	4.27	4.3	8.5	0	28.8	1.15	3.69
MH06g0693900	22.35	38.65	40.47	33.81	23.84	44.27	45.55	46.91	23.28	51.6	24.68	46.58
MH06g0695400	11.62	9.66	11.85	13.87	9.88	13.74	22.06	11.73	8.55	20.1	15.78	19.31
MH06g0695500	30.39	12.79	31.8	22.25	26.46	51.59	55.57	38.4	18.27	74.7	27.84	31.24
MH06g0696300	8.04	6.82	14.17	13.87	6.98	21.06	22.63	10.55	4.42	41.4	13.49	40.61
MH06g0696500	5.07	5.97	10.99	12.14	9.3	10.38	13.46	10.26	3.54	16.2	8.61	10.79
MH06g0697400	2.98	3.41	4.34	5.78	4.07	6.72	9.17	1.76	1.47	24.9	4.02	3.12
MH06g0698000	37.54	22.45	38.74	62.99	31.4	36.63	57.58	24.04	22.39	78.9	24.97	48.85
MH06g0698200	60.48	91.23	76.32	59.52	65.41	57.39	43.83	76.22	102.84	36.9	208.06	129.5
MH06g0699200	29.79	23.59	16.48	23.12	20.06	25.03	28.93	20.23	24.75	49.5	17.79	29.54
MH06g0700900	7.15	11.37	6.65	4.33	1.74	5.5	5.73	3.81	4.71	13.8	1.43	2.56
MH06g0704600	5.36	6.25	8.38	11.56	1.74	6.11	2.58	8.21	2.95	7.5	12.91	7.38
MH06g0704900	12.81	1.71	7.23	4.62	3.78	0.61	3.72	2.93	10.31	1.8	8.9	26.41
MH06g0710500	20.26	15.35	25.73	19.94	17.15	19.84	36.09	19.06	15.03	44.4	12.91	17.61
MH06g0711600	20.26	10.52	22.55	13.87	20.93	18.01	20.63	18.18	14.73	41.7	9.18	21.3
MH07g0011300	4.47	5.12	9.25	5.2	1.45	2.75	2.29	3.81	2.36	3.6	7.46	13.35
MH07g0015600	0	0	0	0	0.58	0.61	0.57	2.93	0.59	11.4	0.86	0
MH07g0018400	11.02	13.07	16.48	16.18	8.72	19.23	21.77	13.19	9.72	37.8	6.03	9.66
MH07g0027600	0	1.14	3.18	2.89	0.58	0.92	2.29	1.47	0	3.6	0	0
MH07g0030400	11.32	18.47	23.71	21.67	9.59	16.49	29.79	18.47	8.55	38.7	17.79	27.26
MH07g0034900	0.6	0	2.31	4.05	1.16	0	2.29	5.86	0	4.8	0.86	3.12
MH07g0075000	1.49	2.84	3.76	4.33	7.56	7.63	7.16	2.93	2.65	10.2	3.73	2.27
MH07g0084500	32.18	34.11	56.08	62.12	50	63.5	63.31	65.08	37.72	52.5	57.4	78.1
MH07g0088600	0	0.85	0.58	0.58	1.45	0	2.29	7.92	0.59	8.7	0.86	0
MH07g0092000	23.54	20.75	32.96	32.94	32.27	36.33	33.8	19.93	21.51	45	16.36	17.32
MH07g0092100	2.98	6.82	45.68	11.56	0.87	0.92	31.22	1.47	0.59	22.8	30.71	84.63
MH07g0094600	13.11	25.01	54.93	31.21	29.94	50.37	43.83	60.68	30.35	66.6	37.88	23.57
MH07g0100500	48.27	33.82	42.5	34.1	37.5	25.03	35.52	43.68	53.63	24.6	58.83	110.48
MH07g0106300	22.94	28.99	42.78	42.47	17.15	18.62	39.24	24.04	12.08	53.4	20.95	30.1
MH07g0107200	0.6	2.27	3.18	6.65	3.2	5.19	4.01	2.64	0	6.3	2.58	2.84
MH07g0115700	8.04	9.66	17.92	7.51	10.76	14.35	9.17	11.43	9.13	20.1	9.76	8.24
MH07g0118500	15.49	38.37	50.88	30.92	26.75	70.52	72.47	42.21	22.98	125.1	47.35	51.69
MH07g0124100	19.07	11.65	10.12	8.67	7.56	8.55	8.88	6.74	11.79	24	10.04	13.92
MH07g0138900	4.47	7.96	6.65	6.65	7.85	10.07	14.9	9.38	3.54	13.2	3.44	4.26
MH07g0142200	22.94	25.86	64.76	36.41	103.79	80.9	123.46	37.52	20.63	138.6	21.52	39.19
MH07g0142600	3.58	6.82	10.12	11.27	2.91	8.55	18.91	11.73	3.24	16.2	7.17	5.11
MH07g0150300	13.11	17.05	13.01	11.85	8.14	8.55	7.16	9.67	8.84	10.2	14.35	22.15
MH07g0157400	0.6	0.85	3.18	2.31	10.18	14.04	15.76	6.45	2.36	15	3.44	6.82
MH07g0160600	0.89	0	0	0	0	0	0	1.17	0	1.2	0	4.26
MH07g0165000	6.85	6.82	29.78	15.31	10.76	7.94	17.76	11.73	6.19	30.3	14.35	27.26
MH07g0186600	0	0	0	0.58	2.04	0.61	0	0	0	3.9	0.57	0
MH07g0237100	14.6	9.95	29.78	21.67	15.41	18.93	16.9	22.28	16.21	35.1	14.64	14.2
MH07g0243900	44.1	34.11	55.79	43.34	40.41	37.25	44.69	24.92	45.08	110.4	35.3	54.53
MH07g0263700	4.47	9.09	24.86	22.25	9.59	17.71	31.22	6.16	3.54	52.8	12.34	15.34
MH07g0270700	1.49	0.85	2.6	1.16	2.04	2.14	3.15	2.64	0.59	3	6.6	4.26
MH07g0271600	10.73	3.41	6.07	6.36	14.54	4.88	3.72	0.88	15.03	7.2	57.68	10.79
MH07g0273700	0.89	0.57	4.05	3.47	0	0	0.57	0.88	0.88	2.1	2.3	9.09
MH07g0274600	5.36	5.97	9.25	5.78	3.49	7.33	8.88	7.92	2.36	9.3	4.3	7.1
MH07g0299200	25.33	8.81	13.3	6.36	5.52	6.72	14.9	45.73	9.43	31.8	17.79	92.3
MH07g0317500	1.49	2.84	8.67	4.62	1.45	4.88	5.16	4.1	1.18	15	4.02	3.98
MH07g0330100	53.03	41.78	61	50.57	54.66	57.7	51.85	73.88	34.18	73.2	23.25	46.01
MH07g0330300	11.92	15.63	22.26	14.74	9.01	12.21	16.61	12.61	12.97	31.5	14.92	17.61
MH07g0331200	5.96	7.39	12.43	10.98	12.5	19.54	15.47	15.24	11.2	18	8.9	23.29
MH07g0339100	12.51	9.95	29.2	13	9.59	15.26	22.34	22.87	7.96	29.1	12.91	15.34
MH07g0350600	2.38	1.42	2.89	4.33	3.78	6.41	3.44	7.92	2.06	12.3	2.58	3.12
MH07g0352800	42.01	31.83	40.47	45.94	25	24.73	26.93	11.43	12.08	36	21.81	15.62
MH07g0355200	71.51	94.93	63.02	64.15	62.22	86.4	75.63	116.38	34.77	136.5	55.67	83.21
MH07g0359700	1.49	4.26	3.76	4.05	1.74	1.53	2.58	2.35	3.83	13.8	3.16	7.1
MH07g0379300	39.63	35.24	27.75	23.69	17.44	23.2	26.64	31.37	27.7	36.6	39.32	69.3
MH07g0380400	7.75	16.48	8.96	14.16	6.4	11.91	14.9	11.43	4.71	16.5	7.17	6.82
MH07g0382600	5.07	5.12	10.12	6.36	1.74	5.19	10.03	7.04	8.55	21.9	6.03	7.67
MH07g0388500	8.94	10.52	22.55	12.71	5.81	12.82	14.32	16.71	6.19	15.6	4.59	8.24
MH07g0389600	10.43	20.18	14.74	13.87	19.19	25.03	25.49	24.92	13.85	35.1	15.78	15.62
MH07g0389700	1.19	3.13	2.31	4.05	22.68	14.96	16.04	14.95	7.66	17.7	13.2	13.06
MH07g0392900	15.2	10.52	17.92	11.85	16.86	12.21	9.74	16.71	8.84	21.3	19.51	14.2
MH07g0394700	5.66	1.71	5.78	0.58	0	0.92	0.57	2.05	2.36	20.4	6.31	7.67
MH07g0395600	1.19	1.14	0	0	0	0	0	0.59	0	6.9	1.43	0.85
MH07g0406900	0.6	1.42	8.09	4.33	0	0	0	0	0.88	10.5	6.31	4.54
MH07g0411700	8.64	3.98	6.94	10.4	0.58	3.97	1.43	6.45	2.95	18.3	11.19	13.35
MH07g0421600	6.26	11.08	11.56	12.42	6.4	13.13	17.19	9.38	4.71	14.1	2.3	6.82
MH07g0427500	43.8	28.71	39.61	31.78	35.47	42.44	32.37	16.42	28.58	72.3	24.97	36.35
MH07g0427600	71.51	98.05	169.12	112.98	109.31	96.47	145.23	107	103.72	266.09	91.83	112.46
MH07g0428300	1.19	0	2.6	0.87	0.87	1.22	3.15	2.35	0.59	28.5	1.72	0
MH07g0428400	3.87	8.24	20.81	7.51	11.63	11.91	16.9	16.42	5.01	19.5	13.2	12.78
MH07g0434600	2.09	1.99	2.6	0	0	0.61	3.72	3.22	0	11.7	0.86	1.14
MH07g0436600	33.97	36.95	62.15	52.88	27.33	44.57	69.9	27.26	18.56	79.5	27.26	37.77
MH07g0437700	27.41	13.93	21.1	22.25	20.06	22.9	29.22	12.9	10.61	39.9	16.07	20.73
MH07g0440100	1.49	2.27	3.18	3.47	0	0.61	1.43	2.35	0	5.7	0.86	1.7
MH07g0441500	6.55	4.55	10.41	9.25	13.95	10.69	9.74	4.98	6.78	24.9	5.17	6.82
MH07g0442100	15.2	14.21	16.77	24.85	22.97	37.86	43.54	40.75	18.86	42.9	21.52	20.73
MH07g0459000	7.15	7.96	12.14	12.14	6.69	18.32	17.76	10.55	7.96	16.8	8.61	21.58
MH07g0459700	1.49	4.83	4.63	3.76	3.78	5.5	6.88	1.17	0.88	6	5.45	3.12
MH07g0464500	0	0	2.02	0	0	0	0.57	0	0	5.1	0	0.85
MH07g0467200	36.35	56.56	37	22.54	28.49	36.33	33.23	49.84	32.12	28.8	40.18	76.11
MH07g0467300	1.79	2.84	2.02	0.87	0	0.92	1.72	3.81	0.88	9	1.15	4.54
MH07g0468200	5.66	8.24	18.21	16.47	3.2	7.63	13.75	9.38	3.54	15.3	8.04	6.82
MH07g0469800	2.38	2.56	5.78	6.07	6.98	3.66	8.31	7.04	2.06	3	8.32	9.09
MH07g0475100	0.6	2.56	4.34	2.89	4.07	1.83	9.74	11.43	0.59	14.4	4.3	9.94
MH07g0480900	36.95	20.18	22.26	39.3	40.99	16.18	22.34	28.73	28.29	19.2	60.84	51.69
MH07g0481800	221.08	277.11	559.1	616.61	327.07	516.55	729.32	462.02	284.06	570.59	337.77	366.07
MH07g0483700	46.78	8.24	21.68	23.69	4.36	5.8	9.74	18.76	8.25	64.2	29.85	62.76
MH07g0484600	2.09	2.27	2.31	4.62	6.11	4.58	5.16	1.17	2.36	15.9	2.87	6.25
MH07g0486300	23.84	11.08	12.14	6.36	7.85	11.3	10.31	21.11	8.25	30.6	9.18	5.68
MH07g0494800	2.68	1.99	10.7	10.98	1.16	3.05	1.72	2.93	0.88	24.6	2.87	5.96
MH07g0495900	28.31	38.65	68.51	73.97	52.62	77.85	90.81	89.12	49.21	111.6	41.9	37.49
MH07g0496200	0	0	0.58	0.58	1.74	2.44	2.58	4.4	0	6	0	0
MH07g0497700	35.16	44.05	45.1	47.68	36.63	71.44	82.5	46.91	37.72	80.7	37.59	66.46
MH07g0500300	10.13	7.67	14.17	13.58	7.85	15.57	16.33	7.33	2.65	18	7.17	7.1
MH07g0501100	0	0	1.45	0.87	0	0.92	1.43	2.05	0.88	12.3	0	0.57
MH07g0501400	4.47	6.82	8.96	12.71	5.81	9.46	9.45	11.14	5.01	10.8	11.19	20.45
MH07g0501700	2.98	9.09	10.12	6.65	3.49	9.77	8.31	6.16	1.77	8.7	6.6	9.09
MH07g0502100	37.54	18.47	22.84	21.67	32.56	19.23	9.17	31.95	18.56	4.2	22.38	67.88
MH07g0508900	29.2	15.92	34.11	19.36	32.85	28.7	29.51	19.06	14.44	56.7	25.25	40.9
MH07g0513300	7.45	3.98	8.38	4.91	11.34	9.16	12.6	7.33	7.07	28.5	8.04	8.52
MH07g0522100	0.6	0.85	1.16	0.87	1.45	4.27	4.58	2.35	0	5.7	0	0.85
MH07g0522600	27.71	26.15	26.89	28.89	18.9	18.62	30.65	24.92	17.39	44.4	20.95	21.02
MH07g0522900	0	0.57	1.16	0	0	0.92	1.43	2.05	0	4.2	0.86	0
MH07g0529000	42.61	37.8	31.22	16.47	12.5	10.38	18.62	16.42	20.92	30.9	24.68	43.45
MH07g0530800	50.95	36.66	58.11	45.94	58.14	77.24	73.05	75.34	43.32	95.4	43.05	61.06
MH07g0531900	7.45	9.09	15.9	10.69	9.3	12.52	11.17	11.14	5.01	18.9	5.17	9.37
MH07g0539400	6.85	8.53	4.34	9.25	11.63	15.26	11.17	12.9	6.48	6.6	13.2	20.73
MH07g0544200	6.55	11.94	9.54	4.62	3.49	7.94	7.16	9.67	3.83	15.6	10.62	18.18
MH07g0545600	1.49	3.69	5.78	2.6	1.74	6.11	4.01	3.81	0.88	6.9	2.3	1.99
MH07g0545900	25.03	19.04	43.07	32.36	16.86	33.58	38.1	19.35	11.79	52.2	15.21	26.13
MH07g0550000	19.66	8.81	20.24	15.89	12.79	6.41	18.05	9.09	6.19	32.1	9.47	14.2
MH08g0011700	4.77	10.23	7.81	10.69	4.07	7.33	11.74	8.21	3.83	13.5	4.02	5.68
MH08g0018100	8.34	7.11	17.63	15.31	13.37	16.49	18.91	14.36	6.78	28.5	4.88	9.37
MH08g0018200	21.15	19.04	23.13	33.52	24.13	14.96	20.63	17.88	10.61	19.5	30.42	35.5
MH08g0019400	24.13	11.94	4.63	3.47	28.78	25.34	12.6	1.47	7.66	31.2	4.3	5.68
MH08g0019900	0	0	2.02	0.87	6.98	0	4.3	9.09	4.42	9.6	28.7	21.02
MH08g0020700	14.9	17.62	32.38	18.49	14.83	15.88	20.05	16.12	11.79	42.6	18.94	19.88
MH08g0020900	26.82	34.67	39.61	48.25	33.43	55.26	74.19	34.59	22.98	58.8	19.8	26.41
MH08g0030200	64.06	74.75	91.93	160.94	56.11	98.3	137.79	113.75	39.78	114	76.91	67.59
MH08g0032200	10.73	15.92	19.08	14.16	8.72	12.52	29.22	26.09	14.73	35.4	14.06	21.87
MH08g0032400	2.68	3.13	4.63	7.22	3.49	4.58	3.72	2.93	3.83	26.1	4.3	3.69
MH08g0042900	10.13	14.21	25.44	22.25	9.01	18.32	20.91	24.04	16.8	42	15.78	15.9
MH08g0046400	12.51	17.91	17.92	18.49	16.28	13.74	15.76	12.9	10.31	27.9	10.33	11.08
MH08g0048900	0	0	0	0.58	0.58	0.61	0	4.1	0	4.8	3.44	0
MH08g0049000	0.89	1.71	4.34	1.16	1.74	1.83	0.57	2.64	0	9.9	2.3	1.99
MH08g0051700	0.89	2.56	1.16	0	0	1.53	0.86	0.88	0	16.2	0	0.57
MH08g0061100	3.87	7.96	7.23	4.62	5.23	8.24	6.3	3.52	1.77	26.4	3.44	1.7
MH08g0061400	2.98	9.38	9.54	23.69	56.69	32.97	40.39	43.39	18.56	34.2	42.76	34.93
MH08g0066400	48.86	25.3	60.42	51.72	65.7	63.19	73.33	35.47	38.31	84	33.86	51.12
MH08g0066600	4.47	8.24	7.52	2.02	2.33	6.72	8.31	44.56	4.42	49.2	14.06	2.84
MH08g0088800	0	1.71	1.45	0	0	0.92	2.01	0.88	0	4.2	0	1.42
MH08g0113300	54.52	69.92	100.02	82.93	70.65	100.44	118.31	85.6	68.36	138.9	54.53	61.63
MH08g0120200	0.6	1.14	1.45	1.16	3.49	1.83	4.58	0.88	2.65	6.6	0.86	10.51
MH08g0126100	0.89	2.84	6.07	4.33	3.2	4.58	3.15	4.69	1.47	9.6	2.58	3.12
MH08g0156800	15.2	15.06	27.46	23.12	23.55	30.83	32.94	12.31	12.97	60	11.19	17.32
MH08g0175700	0	2.27	1.45	1.73	0.87	1.83	1.43	2.05	0	3	4.3	3.98
MH08g0177600	13.11	21.03	17.63	11.85	19.77	18.32	17.76	23.45	14.73	24.9	24.11	49.13
MH08g0178900	3.28	3.41	4.05	0	0	3.36	8.02	15.83	4.71	46.8	6.6	9.66
MH08g0182900	0	2.27	1.16	3.76	2.91	5.8	3.72	3.81	0.59	6.3	2.3	1.99
MH08g0210500	9.53	16.77	29.49	13.29	9.88	11.91	11.74	11.43	13.55	30.3	26.4	18.46
MH08g0212000	0	0	0	2.02	0	0.92	0	0	0	0	4.02	5.11
MH08g0218000	0	1.99	3.47	0	0	2.75	0	2.35	0	9.6	0	0.57
MH08g0227500	4.47	6.25	8.38	3.47	2.04	4.27	10.03	6.74	1.47	16.2	3.73	4.26
MH08g0248800	9.24	3.98	9.83	9.25	22.68	12.52	8.31	0	5.3	14.7	3.16	3.12
MH08g0267600	0	0	4.05	0	0	0	0	0	0	9	0	0
MH08g0272800	60.19	64.23	73.14	69.92	29.94	42.74	44.4	39.28	28.88	62.4	78.34	65.32
MH08g0278400	29.5	25.86	29.49	29.18	21.22	36.33	48.41	36.94	17.97	44.4	21.81	20.16
MH08g0314000	0	0	0	0	0	0	0	0.88	0	4.5	0	0
MH08g0326600	0.6	1.42	3.18	2.6	2.91	1.53	2.86	4.69	0.88	7.5	4.88	5.4
MH08g0326700	37.24	25.01	45.39	49.12	52.62	96.78	73.91	38.7	31.23	77.7	37.31	66.46
MH08g0337600	10.43	12.51	9.83	9.54	13.95	11.3	10.03	7.62	7.37	26.7	9.18	6.82
MH08g0340500	47.08	45.76	72.85	65.01	71.52	113.87	100.55	71.82	43.02	124.5	33.58	46.86
MH08g0373400	103.39	143.81	164.49	210.06	370.09	281.48	221.72	173.84	108.14	112.8	296.73	163.3
MH08g0379100	32.48	32.12	34.69	10.98	7.56	14.65	18.91	20.23	14.73	90.3	20.38	19.6
MH08g0392800	11.32	8.81	43.94	22.25	12.79	13.74	31.8	41.34	8.25	30	21.52	26.98
MH08g0394800	4.47	3.69	8.09	3.76	2.62	8.24	6.59	5.57	3.54	11.1	2.01	6.82
MH08g0396700	0	0	0	0	0	0	0.86	2.05	0	2.4	1.72	3.69
MH08g0397800	7.15	4.83	6.07	11.56	4.65	8.24	10.03	5.28	2.95	15	4.3	6.53
MH08g0401300	33.07	34.67	54.64	62.99	49.42	63.19	51.85	30.49	22.98	65.4	32.14	28.97
MH08g0402600	84.62	92.37	75.45	87.55	51.17	85.18	130.34	165.34	54.81	134.1	46.49	74.98
MH08g0407000	8.94	5.12	14.45	8.67	5.23	8.55	10.31	7.04	4.71	14.1	5.17	6.25
MH08g0408600	0	1.71	4.05	0.87	0	0	0.57	0	0	4.5	0	0
MH08g0409400	8.94	8.53	17.63	18.49	11.34	20.76	27.21	41.63	8.25	35.4	12.91	8.24
MH08g0419600	5.36	5.4	13.3	13.87	8.43	13.74	10.89	9.97	7.07	23.7	8.04	6.25
MH08g0420200	35.16	17.91	18.79	26.58	17.73	30.53	41.25	46.61	24.75	102.6	30.13	33.51
MH08g0430400	4.17	6.82	6.07	11.27	4.65	11.3	13.18	6.74	3.54	13.8	8.04	6.82
MH08g0430700	19.96	9.09	30.35	29.18	26.17	17.71	46.41	50.13	13.85	33	41.04	64.75
MH08g0432200	1.19	1.42	1.73	0	0	0	0.57	9.38	0.59	12.3	6.6	1.14
MH08g0435200	10.13	3.41	9.25	8.09	7.85	6.72	21.48	14.36	9.13	8.4	14.64	28.68
MH08g0440300	0	0	0	0	0	0.92	0.57	0.59	0	8.7	0	0.57
MH08g0442500	84.92	53.15	153.51	166.72	109.02	153.87	164.71	82.08	80.44	241.8	64.86	78.38
MH08g0447100	0.6	1.99	4.63	2.6	0.87	0.61	1.72	4.69	1.47	7.2	3.16	4.26
MH08g0464900	0	1.42	1.16	0.58	0.58	4.27	0	0.59	0	5.1	0.86	0
MH08g0467600	17.88	8.53	22.26	23.12	18.9	24.73	36.67	8.5	15.91	40.2	8.04	9.66
MH08g0476200	1.49	2.84	6.07	4.91	2.33	5.5	6.88	7.04	1.47	28.8	8.61	31.81
MH08g0476400	0	3.41	0	1.73	0	11.6	17.19	2.05	0.59	16.8	1.15	11.08
MH08g0477600	5.66	3.13	3.76	0.87	1.16	1.22	3.44	4.98	5.6	7.8	7.46	18.74
MH08g0483100	2.09	3.69	12.14	6.65	10.47	12.82	11.74	8.79	3.54	21.9	6.6	3.12
MH08g0489000	0	0	0	1.16	0	0	0.86	2.64	0	0	0	3.98
MH08g0491300	29.2	25.01	10.41	24.85	21.8	41.82	36.95	59.8	1.47	63.3	11.48	13.06
MH08g0494100	25.03	24.73	44.23	50.28	49.42	51.59	58.72	26.38	29.76	77.1	57.97	41.18
MH08g0494800	96.54	226.8	113.32	99.4	75.88	103.8	106.56	152.44	101.36	106.5	252.54	164.43
MH08g0495500	0.89	5.68	6.65	5.2	4.07	9.46	6.59	10.85	2.65	12.6	4.88	2.84
MH08g0506700	1.49	0	3.47	3.18	0	1.53	0.57	12.9	2.65	27.6	15.21	100.25
MH08g0507400	10.13	5.68	14.45	13.87	9.01	4.58	3.72	0.59	4.42	13.2	2.3	5.11
MH08g0511000	6.26	8.53	11.85	4.91	9.59	8.55	16.61	13.78	8.25	22.8	14.06	30.67
MH08g0513200	8.34	6.54	6.36	3.76	5.81	3.66	4.58	4.98	1.18	2.4	5.45	8.8
MH08g0513800	0	0	0.87	0	0	0	0	1.76	0	0.9	0	3.69
MH08g0515000	13.71	5.68	10.99	6.07	16.57	11.6	9.17	11.14	11.49	19.2	11.48	25.56
MH08g0515200	42.01	27.57	36.43	19.65	27.91	53.43	62.73	50.42	21.81	56.7	25.54	35.5
MH08g0516800	7.45	4.83	4.34	6.07	1.74	2.44	6.3	6.45	1.18	3.6	7.75	6.53
MH08g0519900	0.89	0	0	0	0.58	0	0	0	0	4.5	0	0.57
MH08g0521900	0	0.85	0	0.58	0	0	1.15	1.47	0.59	27.3	0.57	1.42
MH08g0522700	6.85	9.38	15.61	14.16	8.72	8.85	16.04	12.61	4.13	13.8	9.47	13.92
MH08g0524900	0	1.14	0	0	0	1.22	1.15	0.88	0	1.5	0.57	3.98
MH08g0526500	34.56	44.91	57.24	49.99	38.96	36.02	59.01	32.83	31.53	78	37.02	41.18
MH08g0529100	185.03	227.09	222.02	194.46	148.27	295.52	397.03	389.02	105.78	355.49	241.63	200.79
MH08g0529300	4.47	3.69	3.76	2.6	1.45	7.94	6.02	5.28	0	12.3	3.73	5.11
MH08g0543900	93.56	47.75	77.76	119.91	75.3	65.03	108.28	65.67	35.36	144.9	34.72	41.18
MH08g0544500	4.17	4.26	4.91	2.02	3.49	1.83	2.58	7.92	2.95	0.6	9.47	13.06
MH08g0549200	0	1.71	3.76	1.16	0	0.61	0.86	2.35	0	0	4.02	3.69
MH08g0550700	53.93	39.22	41.34	67.61	65.99	112.65	44.4	22.57	61.58	140.4	44.48	43.45
MH08g0551500	3.28	1.99	2.89	6.36	0	2.44	8.02	9.38	2.06	10.5	2.87	11.08
MH08g0571000	121.86	78.16	121.71	128	195.08	188.06	187.06	109.35	94.88	327.89	81.5	108.77
MH08g0571700	24.73	46.9	108.12	73.68	116	89.14	103.98	57.46	49.5	121.8	58.83	51.4
MH08g0573100	37.54	19.33	14.17	19.65	40.12	17.1	14.9	30.78	41.25	10.8	105.89	119.85
MH09g0023200	3.87	5.97	13.88	7.51	2.33	8.24	10.89	11.43	0.88	13.8	2.87	4.54
MH09g0025300	0.6	0	2.02	1.16	0.58	0	2.29	0.59	0	4.5	0	2.84
MH09g0034800	48.57	67.07	78.34	65.88	41.28	47.93	70.76	54.82	47.44	102.6	43.05	61.34
MH09g0036200	13.41	9.95	16.77	15.31	19.19	38.16	34.38	31.07	13.55	56.1	17.22	22.72
MH09g0041500	5.96	12.22	20.53	16.76	7.56	8.24	20.34	12.61	6.48	24.6	11.77	10.51
MH09g0057800	2.98	0	0.58	1.16	0.58	3.66	6.3	4.69	2.65	4.8	6.89	12.21
MH09g0084500	0.6	0	0	0	9.01	17.71	15.18	13.49	3.83	20.1	4.02	7.67
MH09g0084800	4.17	4.83	4.05	4.05	2.62	4.88	6.59	7.33	3.83	6.3	4.3	15.34
MH09g0107500	3.87	5.4	10.99	12.42	7.56	15.88	14.9	12.31	3.24	18.6	8.04	5.4
MH09g0137300	2.68	1.71	1.73	5.2	2.33	6.11	7.73	5.57	0.88	9	2.58	5.11
MH09g0152900	3.28	2.27	5.2	8.96	18.9	8.24	5.73	8.21	9.13	3.9	24.11	8.24
MH09g0157800	22.64	16.48	32.67	34.1	31.4	23.2	36.09	25.5	15.32	36	21.52	32.09
MH09g0158900	14.9	9.09	8.38	11.85	7.56	17.4	19.19	15.83	3.54	29.4	6.89	5.11
MH09g0169300	44.99	71.62	39.32	46.23	32.56	45.18	33.8	44.56	25.05	35.1	53.95	39.76
MH09g0185000	9.83	12.51	15.32	11.85	5.23	11.3	18.05	6.16	7.37	29.4	9.18	21.02
MH09g0185900	22.35	21.32	34.98	42.19	36.05	37.55	43.26	38.11	21.81	51	14.35	28.4
MH09g0199300	171.32	190.14	204.1	217.29	189.84	185.31	338.59	308.99	175.03	351.59	278.08	334.83
MH09g0234100	1.49	2.84	8.67	7.8	4.94	5.19	9.74	7.62	2.36	10.5	3.44	5.68
MH09g0249200	1.19	1.42	1.16	2.6	0.87	1.83	2.86	0.88	0	6.3	0	1.7
MH09g0250800	22.05	19.33	24.86	20.51	16.57	11.3	21.48	17.3	15.32	30.9	16.64	19.88
MH09g0251100	3.87	2.56	9.25	2.89	1.16	3.05	14.04	12.61	1.47	12.3	5.17	5.11
MH09g0265700	14.9	17.34	35.56	26.29	21.8	21.37	34.95	19.64	12.67	33.9	24.11	32.09
MH09g0266400	4.47	5.97	13.01	4.91	0.87	2.44	1.43	3.81	3.83	26.1	4.02	10.79
MH09g0270700	3.58	5.68	10.99	9.25	6.4	12.82	12.03	6.45	1.18	17.7	2.3	5.11
MH09g0271100	33.67	37.23	89.62	50.57	22.1	43.05	48.98	55.41	37.42	81.9	39.32	38.34
MH09g0276000	6.26	4.26	12.72	10.11	4.07	9.16	10.6	10.85	3.24	14.7	4.02	8.24
MH09g0303700	10.13	10.8	18.5	6.36	3.49	6.72	9.17	28.44	7.37	16.2	18.65	23.57
MH09g0306600	29.79	36.66	58.4	47.96	31.4	51.59	68.75	43.39	31.82	67.5	23.25	34.93
MH09g0309700	0.6	0.85	0	0.58	0	0	0	0	0	14.7	2.58	3.69
MH09g0310900	8.34	18.47	14.45	31.78	18.61	36.63	31.8	17.59	6.19	40.8	10.62	17.32
MH09g0315800	28.01	24.16	18.79	22.83	21.22	14.96	29.79	23.45	19.15	45.6	22.67	36.35
MH09g0322800	23.54	36.1	36.71	33.52	23.55	28.7	38.96	45.44	19.15	41.4	26.11	28.4
MH09g0324300	0	0.57	3.47	1.16	0	1.22	2.58	2.05	0	4.2	2.58	2.27
MH09g0326600	26.22	28.71	21.68	34.67	21.8	17.4	18.05	19.35	26.23	11.4	53.38	19.88
MH09g0330100	6.55	3.98	7.23	9.25	8.14	2.75	2.86	1.47	1.18	12.3	2.58	0.85
MH09g0336900	21.15	12.22	12.43	9.82	9.3	16.79	10.03	3.22	8.84	44.7	4.88	8.52
MH09g0338100	8.04	19.04	13.59	18.78	15.7	16.79	12.03	24.92	12.97	9.3	29.56	25.28
MH09g0352600	0.6	1.14	10.41	5.78	1.45	0.61	2.01	5.28	0.59	44.4	0	3.69
MH09g0354400	0.6	0.57	7.81	2.89	1.45	5.5	15.47	55.11	0	30.3	6.6	26.98
MH09g0355600	2.38	3.69	4.05	6.36	3.2	5.5	10.6	5.28	1.47	8.4	2.58	3.98
MH09g0358500	32.48	21.88	10.99	6.07	13.08	17.1	11.46	6.74	4.13	51.3	9.18	26.98
MH09g0359500	9.53	11.08	15.32	17.05	7.27	10.99	11.46	11.73	5.01	13.8	13.2	11.64
MH09g0359900	0	2.84	2.02	1.73	0	2.44	2.01	0.59	0	5.1	0	0
MH09g0364300	14.6	9.38	16.77	14.74	20.35	17.71	17.47	11.43	9.43	28.5	14.06	14.48
MH09g0366200	6.55	3.98	8.09	9.54	20.06	21.06	23.49	11.43	2.65	15	6.89	15.62
MH09g0366400	6.55	9.09	9.25	10.4	7.85	10.38	12.89	6.45	3.83	18	6.89	5.68
MH09g0367200	0.6	0	0.58	0	0.58	0.61	1.43	4.98	0	0	3.44	6.82
MH09g0368200	12.51	18.76	30.64	39.59	20.64	37.86	40.68	45.73	20.04	46.5	22.1	21.3
MH09g0368500	9.24	7.39	21.97	8.67	4.65	10.38	20.63	34.89	1.77	15.9	8.04	17.32
MH09g0370600	0	1.42	0	0.87	3.78	5.19	3.44	6.45	1.47	0.6	17.51	14.77
MH09g0373200	9.83	3.98	6.94	6.93	4.65	4.58	4.01	1.76	1.77	3.6	10.04	8.24
MH09g0378700	5.96	6.54	5.49	4.91	1.74	2.75	10.03	16.42	0.59	27.3	2.87	5.4
MH09g0379500	4.77	5.4	15.03	13.58	6.98	6.41	14.04	14.07	7.96	20.7	17.22	7.67
MH09g0380400	20.86	14.21	17.63	12.71	15.12	15.88	17.76	5.28	9.72	26.1	4.88	3.98
MH09g0382600	2.38	1.42	3.76	6.07	1.45	3.05	5.16	4.69	0.59	7.5	5.45	8.52
MH09g0386200	8.04	8.24	10.7	10.4	9.59	6.41	15.76	12.02	7.96	26.4	9.18	12.78
MH09g0391800	491.62	291.89	428.72	464.62	266.01	342.53	570.91	522.99	204.5	779.68	246.23	408.67
MH09g0391900	6.85	11.94	28.33	4.33	4.36	24.73	24.64	10.26	12.08	17.1	28.12	26.98
MH09g0392900	70.02	73.61	58.11	63.86	50.88	72.96	90.81	104.66	40.66	125.7	64	105.08
MH09g0402800	9.83	10.23	10.99	9.25	6.98	10.07	10.89	12.31	10.61	25.8	10.91	15.9
MH09g0405000	53.33	74.46	58.11	56.06	46.23	30.53	35.52	58.63	36.54	52.8	50.22	73.84
MH09g0406600	0	1.42	6.65	4.62	0.87	1.83	1.15	4.98	0	3.6	4.02	1.14
MH09g0407700	0	1.71	4.63	2.89	0	2.14	2.01	2.93	1.47	0.9	3.16	7.95
MH09g0408000	0	0	0	0.58	0	0.61	0.86	1.47	0	4.2	0	0
MH09g0408200	13.11	17.62	18.5	23.4	16.57	22.9	30.36	33.13	12.67	36	22.38	31.52
MH09g0410900	0	0	0	0	8.14	6.41	8.31	12.31	5.6	7.8	10.33	33.23
MH09g0412000	10.13	17.05	15.9	23.98	11.34	14.04	15.18	12.02	8.84	23.7	10.33	13.92
MH09g0428800	12.81	23.87	13.3	14.74	12.21	16.49	9.17	21.99	12.97	9.6	21.81	30.1
MH09g0428900	35.75	38.37	48.57	47.68	29.65	45.49	42.68	57.17	25.93	69.6	36.73	36.92
MH09g0430200	9.83	6.82	10.7	14.74	12.21	20.15	16.61	6.16	5.01	29.4	10.62	9.37
MH09g0431300	0	1.14	37.58	12.42	0.58	2.75	8.88	34.59	2.36	11.7	4.88	7.67
MH09g0432100	3.28	7.96	19.37	15.6	33.43	48.54	55	52.18	5.6	65.4	14.92	9.94
MH09g0432900	106.96	107.72	150.04	120.49	177.34	199.96	232.03	158.6	155.29	364.49	113.93	117.58
MH09g0436400	0	0	2.02	0.58	0.58	1.53	4.58	9.97	0	4.5	0	4.83
MH09g0436600	12.22	30.98	21.1	16.76	18.32	11.91	13.18	28.44	11.79	6	43.33	27.26
MH09g0441100	15.2	3.13	7.23	14.45	20.93	10.69	13.75	0.59	2.95	18.9	2.58	1.99
MH09g0442900	27.11	28.71	38.74	56.63	17.73	27.48	59.58	32.54	17.09	116.1	24.39	38.06
MH09g0445000	0	0	0.58	0.58	0.58	0.61	0.57	1.17	0	5.4	0	0.57
MH09g0447000	37.24	92.65	26.31	25.43	20.93	21.06	22.34	35.47	20.92	38.4	30.99	42.03
MH09g0448500	97.73	166.55	136.16	130.02	51.46	120.89	114.3	78.27	44.2	105.9	153.53	125.81
MH09g0453900	14	9.66	17.06	4.62	1.16	3.97	12.6	11.73	7.07	27	14.06	18.18
MH09g0457400	0	0	0	1.44	0.58	0	0	0	0	0	0	4.26
MH09g0458500	19.37	14.78	22.26	17.91	20.64	18.93	20.34	13.49	7.96	28.5	7.17	17.32
MH09g0461300	26.82	16.77	31.51	33.81	27.91	30.22	40.68	29.32	9.72	63	13.49	32.09
MH09g0465500	0	0.57	1.45	1.16	0.87	4.27	5.16	6.16	0	5.1	0.57	0.57
MH09g0466100	14.6	12.22	10.12	6.36	4.94	10.38	13.75	15.54	8.55	25.8	7.75	11.64
MH09g0466500	5.36	7.39	12.43	13.58	7.85	13.43	10.6	18.47	9.43	23.4	13.2	20.16
MH09g0469200	0	0	0	0	0	0	1.43	3.22	0	4.2	0	0.57
MH09g0469700	0	0	0.58	0	1.74	0	2.01	2.35	0	0.6	2.01	5.68
MH09g0470900	2.38	3.98	6.94	2.31	1.74	1.83	1.15	2.93	2.65	2.4	5.17	10.22
MH09g0472000	12.22	19.04	17.92	19.36	6.69	11.6	10.31	13.49	10.9	31.5	9.76	16.19
MH09g0475700	6.85	6.54	12.14	7.22	7.85	8.55	14.32	7.92	3.54	15.6	4.02	7.67
MH10g0011900	28.6	23.59	39.03	37.85	26.46	32.36	44.11	42.21	22.1	45	16.93	37.77
MH10g0015400	0.6	0	0	0	0	0	0	0	0	0.6	4.02	6.25
MH10g0020600	2.09	0	2.31	2.02	1.16	3.97	4.01	7.33	0.59	6.6	1.72	4.83
MH10g0024500	0	0.85	1.45	0.58	0.58	3.05	0.86	4.4	0	0.6	4.3	2.56
MH10g0030900	13.71	8.81	29.78	23.69	2.04	8.55	14.32	4.4	7.37	73.8	4.88	9.94
MH10g0047400	2.38	1.71	0.87	0.58	0	1.22	2.58	0	0	4.8	0	4.54
MH10g0061200	38.44	43.77	56.37	47.68	41.57	49.46	52.99	55.7	32.12	69.3	31.57	48
MH10g0061500	0	0.57	1.45	0	0	0	0.86	0	0	19.8	0	1.14
MH10g0077700	6.55	9.95	15.03	8.96	3.78	4.88	24.35	14.66	6.48	20.4	17.22	12.78
MH10g0077800	14.6	11.37	22.55	17.91	10.18	19.54	18.91	17.88	11.79	29.1	9.47	10.51
MH10g0114700	6.85	11.37	18.79	14.74	29.94	14.96	24.35	16.12	8.55	21.6	13.2	21.02
MH10g0115900	0.6	5.4	5.49	4.91	1.45	3.97	8.88	11.43	1.18	18.3	3.44	2.56
MH10g0116800	12.81	7.11	11.85	10.98	4.65	11.3	10.6	5.28	5.6	16.8	4.59	8.8
MH10g0139200	0	0	0	0	0.58	2.44	0.57	0	0	0	0	6.25
MH10g0141800	1.49	1.99	1.45	1.16	0.87	0.92	1.72	3.52	0	3.6	2.58	3.41
MH10g0166200	1.19	0.85	3.47	2.6	6.11	3.97	3.15	0.88	1.18	6.9	3.44	3.12
MH10g0172900	0	1.42	1.45	0	0	0	0	0	0	5.4	0.57	0
MH10g0177700	13.11	10.23	15.32	13.58	8.14	14.04	18.33	7.33	9.43	26.4	10.62	11.93
MH10g0188800	0.89	3.13	7.23	4.05	1.45	0	1.15	0	0	19.8	0	1.42
MH10g0197100	6.55	9.09	5.2	2.31	0.58	3.36	1.43	3.81	2.36	3.6	10.62	8.52
MH10g0225000	18.47	12.51	30.93	35.83	28.2	33.89	22.06	7.62	13.55	35.1	17.51	16.19
MH10g0238400	0	0	0	0	0	0	0	1.47	0	3.9	0	0
MH10g0250000	9.83	12.22	15.03	20.51	8.72	15.88	18.91	23.16	11.2	27.9	8.61	17.32
MH10g0254400	0.6	2.84	6.36	2.02	1.45	0.92	0.86	3.22	0	5.1	1.15	0.85
MH10g0260500	7.45	5.12	11.85	13.29	6.69	14.35	18.33	8.5	7.66	23.4	6.31	5.11
MH10g0265600	94.45	48.03	100.02	67.9	139.26	92.5	114.87	63.32	67.77	205.5	42.19	72.42
MH10g0266900	4.77	6.25	5.2	6.36	5.23	3.66	4.58	3.81	4.42	1.8	13.2	10.79
MH10g0280200	2.98	6.54	10.12	10.4	3.49	3.97	3.72	8.5	3.83	52.5	7.17	14.2
MH10g0283900	7.45	16.77	9.25	9.82	5.23	12.52	10.89	13.78	10.31	21.9	4.59	6.25
MH10g0284000	17.58	12.22	16.19	14.16	12.79	20.45	23.49	18.76	17.09	27.6	28.41	55.66
MH10g0284200	9.83	3.98	5.78	1.44	5.23	4.88	16.04	19.93	11.2	26.4	8.04	15.34
MH10g0289100	29.2	30.41	37.87	36.41	23.84	34.5	36.95	35.18	18.27	37.5	28.12	26.98
MH10g0293700	14.9	25.86	26.6	42.19	25.29	50.68	29.79	48.96	10.61	16.8	33.58	20.16
MH10g0294800	15.49	11.08	24.57	11.27	15.7	18.62	27.5	28.73	17.68	22.2	47.35	59.64
MH10g0295100	9.83	9.09	12.14	17.05	17.44	17.71	15.47	12.02	7.66	20.4	8.61	15.34
MH10g0295200	48.86	51.73	66.78	50.28	40.12	51.59	64.17	55.11	53.92	113.1	44.77	66.46
MH10g0296200	19.37	23.31	23.99	18.2	22.1	29.92	26.64	39.58	20.63	99	12.34	13.63
MH10g0312000	9.83	3.13	8.38	5.2	8.72	4.58	7.16	10.26	2.95	11.7	2.87	4.54
MH10g0314300	23.54	19.04	29.78	16.18	36.05	25.95	22.63	27.56	16.21	37.8	11.77	12.78
MH10g0322700	8.34	16.48	20.53	17.91	11.92	18.93	16.9	17.59	12.08	29.1	8.32	20.16
MH10g0323800	41.71	31.26	44.23	50.85	57.85	59.53	63.02	26.09	28.29	81	39.03	37.77
MH10g0324300	25.92	26.43	56.95	27.74	45.64	86.4	72.47	51.6	23.57	77.4	40.18	69.58
MH10g0325900	1.49	0.57	1.45	2.02	4.07	1.83	1.72	0.59	0	4.2	0.86	1.42
MH10g0328900	42.9	84.98	35.56	63.86	63.96	188.06	160.13	117.85	13.26	429.89	24.97	45.72
MH10g0331000	5.36	7.11	5.78	8.09	3.78	11.3	10.31	5.57	1.47	4.2	5.45	8.24
MH10g0331700	1.49	0.57	5.49	3.18	3.49	5.19	12.89	17	0	3.9	7.17	39.19
MH10g0332700	396.57	383.12	554.18	404.23	339.28	471.98	459.19	234.53	288.77	540.89	538.94	711.13
MH10g0335400	46.78	19.61	24.57	15.03	25.29	36.63	22.92	29.9	20.63	39.6	44.48	78.95
MH10g0347400	0	0.85	1.16	0.87	0	0.61	1.43	0.59	0	3.9	1.15	0.57
MH10g0349700	42.31	56.84	61.86	60.1	54.95	68.69	67.03	47.2	36.54	73.8	37.88	47.43
MH10g0351900	8.04	9.38	14.45	10.98	8.72	11.6	15.76	20.23	6.48	20.1	13.77	14.2
MH10g0352600	1.49	5.12	3.47	3.47	1.16	5.8	15.18	6.16	0	8.4	2.3	6.25
MH10g0353300	4.47	8.24	7.81	6.07	0.87	2.44	8.59	21.11	2.95	16.2	6.6	8.8
MH10g0357300	7.75	7.11	4.91	10.98	5.81	6.11	6.3	6.45	5.3	15.3	4.3	6.25
MH10g0357500	0.89	2.56	8.09	4.91	3.2	6.72	6.88	3.22	3.54	11.1	4.88	4.54
MH10g0365700	12.51	13.64	20.53	19.07	15.41	11.3	21.2	15.24	6.78	30.3	11.19	13.63
MH10g0367800	30.99	31.55	46.54	40.45	39.54	56.48	52.14	36.06	29.47	66	23.25	28.12
MH10g0371700	42.61	20.46	20.81	22.25	29.65	38.47	40.96	18.18	9.72	119.7	12.34	21.58
MH10g0376900	7.45	6.82	13.3	15.89	6.69	8.85	10.89	10.85	6.78	17.4	10.62	9.09
MH10g0379700	3.28	5.68	7.52	10.69	2.62	4.58	10.31	4.4	5.01	15.3	3.44	4.83
MH10g0380800	28.31	6.82	9.83	4.05	16.57	19.54	29.22	31.66	43.61	100.8	70.6	71
MH10g0381000	3.58	7.39	6.07	5.78	5.52	9.46	9.17	12.9	5.01	10.2	4.02	15.05
MH10g0381400	3.58	4.55	12.14	9.82	9.3	12.21	13.75	8.79	3.83	15	4.59	5.4
MH10g0381600	0	0	0	0	0	0	0.57	1.47	0	0	1.15	7.38
MH10g0382400	53.63	36.66	78.05	81.77	60.76	61.06	76.2	85.9	36.54	41.4	83.8	85.48
MH10g0384200	7.45	3.41	9.83	6.93	16.28	9.16	6.88	4.1	5.89	4.5	10.62	24.71
MH10g0385500	5.07	7.67	8.96	7.22	5.81	20.45	12.89	12.61	2.65	24.6	10.91	14.2
MH10g0385800	0	0.57	1.16	0.87	0.58	0	1.72	4.69	0	1.5	1.15	5.4
MH10g0386100	8.34	11.94	10.12	15.31	13.08	11.91	16.9	8.79	6.78	21	11.19	13.63
MH10g0386700	11.32	7.67	21.68	15.6	18.9	21.37	21.2	15.54	7.37	36.9	6.6	11.64
MH10g0387700	8.34	9.66	9.25	10.98	11.34	13.13	16.9	10.26	10.02	21.9	8.61	12.5
MH10g0389500	0.6	2.27	4.63	4.62	7.85	4.58	7.45	6.16	0.59	7.2	5.17	1.99
MH10g0390800	0.89	0.57	3.76	1.44	2.04	3.05	2.86	4.69	0.88	6	1.72	3.41
MH10g0392800	0	0	0.87	0	0.87	0	3.44	27.56	0	14.1	1.72	8.8
MH10g0393500	0	0.57	3.47	4.91	5.81	1.83	34.38	91.76	0.88	42.6	19.51	72.7
MH10g0393800	7.75	14.5	14.17	8.09	6.4	15.57	18.91	25.8	1.77	69.3	10.33	11.36
MH10g0394600	2.68	0.85	0.87	0	0.87	1.83	2.58	4.98	1.18	7.5	7.75	21.58
MH10g0400500	0.89	0.85	2.6	0.87	0	1.53	2.01	3.22	0	5.1	0.86	0.57
MH10g0401400	10.13	21.03	24.86	25.72	9.59	19.23	34.38	26.09	11.2	29.1	12.34	19.03
MH10g0405000	0.6	0.85	0.87	0	0	0.92	0.57	5.57	0	8.7	0.57	3.98
MH10g0416900	15.2	18.47	30.07	45.65	31.98	39.99	73.05	30.2	18.56	69.9	24.11	29.25
MH10g0428500	32.77	47.75	47.99	24.27	29.07	47.63	52.71	34.89	22.98	106.2	63.71	43.74
MH10g0429900	35.75	27.57	48.86	51.72	45.93	61.06	69.32	44.85	30.94	95.7	26.98	48.28
MH10g0430300	107.86	156.32	106.96	81.48	103.21	90.06	111.43	170.62	94.29	186.6	149.8	311.55
MH10g0433600	14.6	43.77	13.59	26.29	11.63	15.88	13.18	11.73	3.83	22.5	17.22	11.36
MH10g0434400	2.68	4.55	5.2	8.67	1.45	5.19	8.31	3.52	4.13	12.6	3.73	3.41
MH10g0435100	5.96	3.98	10.7	15.6	31.4	18.93	16.9	1.47	3.24	20.7	4.59	6.25
MH10g0435600	6.55	8.81	8.09	8.38	6.11	11.91	11.17	17.88	6.48	16.2	10.33	11.36
MH10g0441700	20.56	30.13	59.26	41.61	37.79	48.24	59.01	48.66	27.4	62.7	31.28	21.58
MH10g0444100	0.6	2.56	3.76	0	0	1.22	0	2.35	0	5.7	1.43	0.85
MH11g0010500	3.58	1.71	3.18	3.47	2.62	2.14	6.3	6.45	6.19	6.3	12.05	31.24
MH11g0015200	8.04	11.94	12.43	11.56	13.08	15.57	11.17	14.95	8.25	15	18.65	19.88
MH11g0017000	0.89	1.14	1.45	1.16	4.07	3.36	2.58	1.47	1.47	10.5	0	1.14
MH11g0022500	8.94	9.95	9.54	11.85	11.34	11.3	9.17	6.74	4.42	17.4	7.46	12.5
MH11g0023400	0	0.85	0.58	2.02	0	0	1.15	1.17	0	0.6	2.3	3.69
MH11g0026900	0.6	2.56	1.45	1.16	3.2	0.92	0	1.76	0	0.9	4.3	1.7
MH11g0029200	5.07	5.12	8.67	5.49	4.36	3.36	2.01	7.92	6.19	18.6	12.63	8.52
MH11g0033300	4.77	6.54	5.2	2.02	1.74	1.83	2.58	4.4	3.24	11.1	4.88	9.94
MH11g0033500	0	2.84	2.02	1.73	0.58	1.83	1.72	0.88	0.59	0	6.31	2.56
MH11g0035900	0	0	1.16	0	0	0	0	0.59	0	0	0	6.25
MH11g0053000	11.32	11.37	15.61	19.65	6.69	12.21	15.76	12.02	5.6	26.7	13.49	14.77
MH11g0053800	0	0.57	1.73	0.58	0	3.05	0	1.47	0	3.6	0	3.69
MH11g0055700	14	7.67	12.72	27.74	28.2	14.35	22.63	20.23	7.96	12.9	27.55	30.39
MH11g0056800	5.96	3.13	3.18	2.31	1.74	5.19	8.31	1.76	1.47	12	2.58	3.12
MH11g0057600	0	1.42	3.18	1.73	0.58	1.83	6.3	2.93	0.59	0.9	2.87	7.1
MH11g0059200	0	0	0	2.31	0	0.61	0.57	2.05	0	0	0.86	3.69
MH11g0075300	9.53	12.79	15.32	17.91	10.76	6.11	11.46	12.9	5.3	41.4	13.77	26.41
MH11g0082800	30.39	29.56	45.96	31.78	39.83	33.28	47.55	27.85	23.57	72.3	16.93	31.52
MH11g0107800	3.58	6.82	6.07	10.69	5.52	7.94	9.17	7.04	4.13	13.2	6.6	8.24
MH11g0108800	31.28	33.25	48.28	49.7	28.2	43.96	49.56	51.01	24.46	61.5	25.54	42.32
MH11g0110000	10.13	9.95	14.17	17.34	9.88	15.26	24.92	17.3	6.78	16.5	11.77	9.66
MH11g0117500	2.09	2.84	4.91	5.78	10.47	9.16	7.73	8.5	3.54	15	4.3	18.18
MH11g0118400	22.64	28.42	24.57	28.32	20.93	32.36	22.92	28.73	7.96	53.4	17.79	15.34
MH11g0122800	6.26	10.52	8.38	8.96	7.85	4.88	5.44	6.45	3.24	29.7	6.6	5.68
MH11g0162400	74.79	52.01	111.3	116.16	155.83	108.68	130.34	57.17	77.79	164.4	84.94	73.84
MH11g0168400	5.66	10.8	12.43	12.14	6.4	9.16	6.88	12.31	6.48	9.6	21.24	16.47
MH11g0171200	1.19	1.99	4.34	1.73	0.58	2.75	2.01	2.93	0	6	0.86	3.12
MH11g0192400	1.79	3.98	9.25	6.65	0.58	2.44	7.45	6.74	2.06	18.3	3.44	9.66
MH11g0209000	14.9	17.05	13.59	11.85	19.77	11.91	17.19	10.85	12.08	24.9	14.35	15.34
MH11g0230600	6.55	4.83	3.47	6.93	2.62	8.24	6.02	2.64	4.42	13.5	2.01	4.83
MH11g0234300	22.35	32.12	44.81	34.38	28.78	39.38	46.98	43.09	24.46	57.3	32.14	31.81
MH11g0289100	0	1.14	3.76	0	0	0	0.86	0	1.18	8.7	2.01	0.85
MH11g0329000	1.79	1.71	1.73	4.62	4.07	2.75	5.73	2.35	4.42	3	4.02	13.92
MH11g0369300	2.98	0.57	7.52	4.33	0	0	0.57	1.47	0	5.1	0	1.42
MH11g0386700	25.92	30.7	49.43	28.61	21.51	30.53	41.54	19.64	17.09	45	20.95	27.83
MH11g0388600	51.55	27.85	30.93	23.4	53.2	24.12	32.08	38.11	52.74	99.9	62.27	119.28
MH11g0392300	0	0	0	0	52.62	55.26	61.88	59.51	21.51	103.5	104.17	80.94
MH11g0395100	8.34	7.39	16.48	2.6	5.52	5.8	7.45	34.01	11.2	31.5	18.37	23.86
MH11g0411400	0	0	1.16	0.58	0	1.22	0.57	0	0	7.5	0	0
MH11g0419000	0.6	3.41	2.6	3.47	0	0	0.57	0	0	1.8	4.02	1.7
MH11g0427900	78.36	33.82	37.87	65.59	88.09	22.9	18.91	25.8	81.33	7.5	148.65	211.01
MH11g0432800	2.38	1.14	0.87	0	2.62	5.8	4.3	11.14	2.36	17.7	4.3	10.79
MH11g0436200	84.02	34.11	36.14	21.96	53.2	29.92	37.24	52.18	79.26	84.3	73.75	184.03
MH11g0440500	68.83	52.86	88.17	72.24	38.08	44.88	65.03	40.16	51.27	112.8	39.89	41.75
MH11g0442700	2.98	2.27	5.78	3.76	1.16	1.53	4.87	3.22	1.47	16.8	0.86	2.56
MH11g0452400	0.6	2.27	1.45	0.58	0	2.14	2.01	2.93	0.59	7.2	0.86	1.42
MH11g0479800	14.3	13.93	24.86	15.31	11.34	10.38	22.63	12.02	11.79	25.2	22.67	28.68
MH11g0487900	74.19	51.73	93.66	70.79	89.54	107.77	75.34	31.95	49.21	115.8	64.57	77.82
MH11g0489300	20.86	29.27	29.49	28.89	42.45	44.27	77.34	32.54	22.1	53.4	30.13	29.82
MH11g0491300	24.13	10.23	17.35	23.4	16.86	20.45	20.63	14.36	11.2	23.4	12.05	16.76
MH11g0493000	2.98	0	2.31	2.02	0	0	1.15	4.1	2.95	0.6	24.97	18.46
MH11g0495400	2.98	4.83	61.29	8.09	144.78	8.24	28.36	5.86	3.83	3.3	6.6	136.32
MH11g0495500	0	0	0	0	0	0	0.57	0	0	0	0	5.68
MH11g0525600	6.85	4.83	8.09	8.09	6.98	6.41	15.47	4.1	1.77	9	2.3	4.26
MH11g0577300	0	0	0	0	0	0	0	0	0	3.6	0	0
MH11g0653000	11.32	6.82	33.53	32.07	0	0.92	1.72	2.35	2.36	20.7	27.84	32.66
MH12g0010800	30.69	21.6	17.63	25.43	24.13	23.2	14.32	18.47	15.62	11.1	48.21	70.15
MH12g0014400	57.5	28.42	62.15	62.12	47.39	52.82	68.18	31.07	31.82	104.7	30.13	34.93
MH12g0019800	14	16.77	15.61	17.05	19.77	16.49	21.77	9.97	8.84	36.3	12.05	20.73
MH12g0020800	1.19	0.57	1.45	2.6	1.16	1.83	2.58	2.35	0	6.6	2.01	1.7
MH12g0021900	1.19	6.25	5.49	3.47	1.45	3.36	4.01	7.04	2.06	14.4	4.88	7.38
MH12g0038200	0	0	0.58	1.44	0.87	0.61	2.58	2.93	0	4.5	0.86	5.96
MH12g0038900	0.6	1.71	2.31	0.87	0.87	1.83	0.86	2.64	0.59	6.9	0.57	0
MH12g0046300	8.64	6.54	4.34	7.51	4.65	4.27	7.45	5.28	3.24	21.9	5.17	4.83
MH12g0049000	5.96	8.53	6.94	8.67	3.2	3.66	6.02	6.45	1.77	8.7	4.59	2.84
MH12g0049500	13.11	16.2	63.31	45.65	45.35	46.4	36.38	41.04	13.26	88.2	33	16.76
MH12g0052400	0.6	1.42	3.47	3.18	0	2.44	1.43	2.35	1.47	8.4	1.43	0
MH12g0058600	3.58	2.56	16.48	1.44	0	3.05	2.29	6.16	2.65	12.9	6.31	21.58
MH12g0061700	2.38	4.83	2.89	4.62	2.91	10.07	12.32	4.69	1.18	7.2	4.02	7.67
MH12g0062500	7.45	9.95	11.56	11.85	11.63	12.21	22.34	9.09	4.42	21.9	9.18	8.8
MH12g0065100	1.49	2.27	3.18	5.49	2.04	7.02	7.16	4.4	1.47	8.4	2.87	2.27
MH12g0065200	0	0.57	1.16	0	0.58	2.14	5.73	3.22	0	3	0.57	4.54
MH12g0065400	81.64	38.08	31.51	34.96	47.1	41.52	55.86	28.44	17.39	101.7	22.96	37.2
MH12g0067800	3.28	6.54	15.9	10.4	0.87	6.11	4.3	4.69	0	10.8	6.6	1.14
MH12g0085800	12.22	13.07	31.8	26.29	16.57	21.37	38.39	19.35	12.97	33.6	12.91	12.5
MH12g0085900	34.56	33.25	41.63	43.63	28.49	54.04	65.03	54.53	35.06	108.9	39.32	48.56
MH12g0088200	22.05	25.3	40.18	34.96	28.78	45.18	44.97	51.3	25.34	60	23.53	37.2
MH12g0101700	0	0	0.58	0.58	0	0	0	1.76	0	0	3.16	71.28
MH12g0102300	22.05	4.55	23.42	20.23	15.7	10.99	28.36	66.55	30.35	147	53.09	186.87
MH12g0109400	6.26	13.93	18.79	15.6	11.63	14.96	19.19	12.02	6.78	17.4	11.77	9.37
MH12g0112400	24.43	18.19	22.84	28.61	36.92	21.98	23.2	10.26	12.38	44.1	18.37	20.45
MH12g0130200	0.6	0	17.06	8.67	1.74	3.05	2.58	21.4	1.18	24.3	4.88	7.38
MH12g0135900	0	0.57	8.38	0.87	1.74	1.83	2.86	4.1	1.18	11.1	4.59	8.8
MH12g0176000	2.68	1.71	3.47	3.76	2.33	3.66	3.15	1.17	1.47	7.8	3.16	2.84
MH12g0177500	106.37	212.31	208.14	246.76	96.52	158.75	264.97	245.67	144.68	390.29	221.26	239.69
MH12g0183300	0	0	0	0.58	0.58	0	0.57	0	0	0	1.15	3.98
MH12g0184300	58.4	77.31	105.81	115.87	78.2	81.51	120.89	48.08	65.42	218.1	71.74	80.09
MH12g0184400	6.85	7.96	9.25	8.67	11.34	18.62	16.9	15.24	6.48	28.2	13.2	14.2
MH12g0186800	22.64	24.16	34.11	22.83	45.06	37.86	49.56	31.07	20.63	82.5	22.38	48.56
MH12g0235000	0	0	1.73	0.58	0	1.53	2.58	10.26	0	1.5	4.02	3.98
MH12g0239600	0	0	0	0	0	0	0	0	0	0	0.86	4.26
MH12g0242100	46.18	23.31	48.86	51.72	116.58	69.91	75.34	11.43	33.3	90.9	27.84	31.24
MH12g0251000	5.66	8.53	6.94	4.62	0	2.44	1.43	2.05	2.95	10.5	1.43	3.12
MH12g0263500	0	0	0	0	0	0	0	0	0	0	4.59	2.27
MH12g0293100	0	0.57	1.16	0.87	0	1.83	1.72	0	0	4.5	0	0.85
MH12g0313500	10.73	9.66	26.02	18.2	15.41	18.32	23.2	16.42	19.45	47.1	11.48	15.9
MH12g0322600	33.67	28.14	34.69	30.92	32.56	39.69	42.97	22.28	22.69	61.5	22.1	36.35
MH12g0325400	78.06	102.03	106.1	61.26	59.89	112.35	86.8	93.81	73.67	181.5	72.32	97.41
MH12g0326200	9.53	13.07	41.34	32.65	0	0	0	0	2.06	18.3	2.3	8.24
MH12g0327800	9.83	8.53	18.5	16.18	8.43	17.1	20.34	19.06	6.78	21	11.48	21.3
MH12g0328600	92.07	62.24	90.48	87.26	91.29	133.72	102.55	37.82	37.42	199.2	85.52	92.02
MH12g0329200	2.38	2.84	2.02	2.89	2.33	4.58	4.01	2.93	0	5.4	1.43	4.54
MH12g0339600	39.93	27	18.5	25.72	45.35	42.74	42.4	63.62	14.73	57.6	21.52	19.6
MH12g0340900	1.79	0.85	5.2	3.18	0	0	1.72	4.69	1.77	0.9	11.19	38.06
MH12g0342900	34.26	36.95	33.25	47.1	27.04	23.2	31.8	29.9	16.8	49.5	27.55	29.25
MH12g0346100	1.79	1.99	4.05	2.6	0	0	0.86	0	0	3.9	2.3	1.14
MH12g0358200	44.69	53.72	53.77	45.65	37.21	54.65	64.45	41.04	39.48	108.6	51.37	57.94
MH12g0360700	1.49	2.84	1.73	1.16	0	1.22	0.57	1.47	0	3.6	0.86	1.42
MH12g0361300	13.11	16.2	12.72	8.38	8.43	6.41	12.03	14.95	5.3	18.3	13.49	17.04
MH12g0367200	103.69	250.39	174.32	160.36	87.22	141.04	98.83	111.69	68.07	91.2	218.68	110.76
MH12g0388200	0	2.27	1.16	1.44	1.16	0.61	2.01	1.76	0	3.6	2.58	1.7
MH12g0388600	5.96	2.84	7.81	9.82	5.81	14.65	11.74	9.67	1.18	26.7	8.9	6.82
MH12g0389100	538.1	487.15	498.1	418.39	677.1	480.83	505.6	479.02	346.52	1088.08	463.47	292.23
MH12g0390700	19.66	21.6	9.54	9.82	8.72	9.77	12.32	13.19	9.13	17.1	8.32	25.84
MH12g0392300	5.96	1.99	6.94	8.96	4.65	6.11	5.44	4.69	1.18	6.6	5.17	6.25
MH12g0392700	35.46	42.35	59.26	38.43	36.92	37.25	46.12	26.68	30.06	65.4	38.74	36.35
MH12g0392800	61.38	57.7	37.58	61.54	30.53	54.34	68.75	71.82	32.71	72.6	31.28	36.92
MH12g0398700	112.33	70.77	118.53	125.98	109.31	139.21	167.58	79.74	38.01	225.6	46.78	69.86
MH12g0406500	4.77	9.09	26.89	31.49	2.33	0.92	2.58	3.81	3.24	12.9	9.76	17.89
MH12g0408400	3.28	1.42	14.45	2.02	0.87	4.58	3.72	19.35	2.95	28.5	15.5	50.27
MH12g0414900	2.98	1.71	3.18	3.18	2.04	2.14	6.02	2.64	2.06	9	4.59	10.79
MH12g0417500	0	0.57	4.34	1.16	0.58	0.61	0	2.35	0.59	8.1	2.3	1.42
MH12g0418300	3.28	7.39	8.67	13.58	8.72	16.18	14.32	25.21	5.6	16.2	6.31	4.54
MH12g0425700	4.17	9.38	8.96	5.2	2.62	3.66	9.17	1.47	0.59	32.4	0.57	4.54
MH12g0426800	11.92	15.63	25.73	18.49	19.77	14.04	16.9	19.06	11.2	30	21.81	48.28
MH12g0430800	21.15	36.1	44.52	53.17	20.06	30.83	26.07	37.23	19.74	42.6	24.97	23.29
MH12g0431800	212.44	163.42	203.52	216.42	98.56	136.16	242.06	170.03	129.95	638.99	92.41	150.52
MH12g0433900	2.98	9.09	9.25	7.22	2.62	5.8	6.3	7.04	3.54	17.7	7.17	9.37
MH12g0434900	6.26	5.97	15.61	19.07	1.45	3.66	4.87	11.73	5.01	15.9	6.31	7.67
MH12g0435200	1.49	2.27	9.25	7.51	6.98	10.07	11.74	8.79	2.65	14.4	3.73	6.53
MH12g0435700	16.09	25.86	26.31	30.34	11.92	16.79	25.49	26.68	18.86	40.5	18.08	31.52
MH12g0436500	0	0	1.16	0.58	0	0	2.86	2.64	0	2.1	2.3	6.25
MH12g0449300	28.9	16.77	22.84	19.65	33.43	40.6	47.55	33.71	34.18	192.6	33	69.3
MH12g0456000	3.87	6.82	12.72	13.29	0	3.05	17.19	16.42	1.77	29.7	4.88	12.5
MH12g0457000	84.62	83.84	73.14	39.59	15.12	18.32	22.06	33.42	25.64	92.7	39.03	66.74
MH12g0458900	0	0.85	1.16	0	0	0.92	1.72	0	0	3.6	0	0
MH12g0460700	32.48	13.93	36.14	28.61	11.05	9.46	33.52	18.76	16.5	27.9	29.27	33.23
MH12g0462200	25.62	22.45	37.58	30.05	24.42	36.63	44.4	27.26	11.49	71.7	19.8	24.99
MH12g0462300	22.94	13.07	13.3	21.38	12.21	16.49	28.07	18.47	11.79	44.4	17.79	28.4
