# Supplementary material for: Transcriptomic and proteomic profiles of II YOU 838 (Oryza sativa) provide insights into heat stress tolerance in hybrid rice
Source: PeerJ. 2020 Feb 21;8:e8306. doi: 10.7717/peerj.8306 (PMC7039125; doi:10.7717/peerj.8306)
Supplement: Supplemental Information 7 [file peerj-08-8306-s007.xls]

## Sheet: 586 DEGs
Table S4: The 586 significantly regulated genes that were differentially expressed in hybrid rice II8 flag leaves at all the time point.
Gene ID	FPKM				log2 FC
	0 h	24 h	72 h	120 h	24 h / 0 h	72 h / 0 h	120h / 0 h
MH01g0029900	0.51	5.44	3.92	5.84	3.41504	2.94228	3.5174
MH01g0033600	7.21	18.65	23.45	56.08	1.3711	1.70152	2.95942
MH01g0034200	153.35	21.91	45.28	28.06	-2.80717	-1.75988	-2.45024
MH01g0049900	9.03	81.62	84.32	250.58	3.17612	3.22308	4.7944
MH01g0055100	87.76	22.1	15.59	22.8	-1.98952	-2.49294	-1.94453
MH01g0056500	15.65	98.47	93.56	81.78	2.65352	2.57973	2.38559
MH01g0065300	18.59	5.46	8.29	6.73	-1.76755	-1.16508	-1.46585
MH01g0074800	2.73	0.21	0.11	0	-3.70044	-4.63333	-14.7366
MH01g0081900	1.46	12.75	14.75	32.77	3.12646	3.33667	4.48834
MH01g0087200	3.41	11.63	21.56	19.51	1.77001	2.66051	2.51637
MH01g0091100	1.9	6.95	7.6	6.15	1.87101	2	1.69459
MH01g0091300	9.76	250.16	35.39	35.94	4.67983	1.85839	1.88064
MH01g0092800	912.54	240.7	239.34	196.47	-1.92265	-1.93083	-2.21558
MH01g0098300	195.89	52.44	82.87	56.38	-1.9013	-1.24112	-1.79679
MH01g0098900	1072.2	49.68	475.43	162.56	-4.43177	-1.17327	-2.72153
MH01g0121900	19.31	6.68	7.02	5.11	-1.53143	-1.45981	-1.91795
MH01g0122400	0.67	22.61	8.84	6.96	5.07666	3.72181	3.37685
MH01g0154300	5.04	17.09	10.83	13.44	1.76166	1.10354	1.41504
MH01g0163700	8.24	44.86	25.05	101.83	2.44471	1.60409	3.62737
MH01g0166800	7.29	0	0	0.01	-16.1536	-16.1536	-9.50978
MH01g0169000	99.76	33.14	48.03	38.78	-1.58989	-1.05453	-1.36315
MH01g0187100	2.22	38.59	12.74	12.14	4.1196	2.52073	2.45114
MH01g0190300	136.19	42.25	53.53	50.1	-1.6886	-1.3472	-1.44274
MH01g0191400	22.38	44.77	47.18	68.13	1.00032	1.07597	1.60608
MH01g0219300	0.86	21.34	11.63	14.24	4.63308	3.75737	4.04947
MH01g0242700	0.58	78.37	10.01	17.03	7.0781	4.10925	4.87588
MH01g0261900	0.8	3.74	4.33	5.48	2.22497	2.4363	2.7761
MH01g0314200	360.93	100.49	99.3	17.25	-1.84467	-1.86185	-4.38705
MH01g0323300	8.98	169.34	29.64	46.25	4.23706	1.72276	2.36467
MH01g0363000	47.23	22.62	18.36	17.5	-1.0621	-1.36314	-1.43235
MH01g0367000	46	19.85	119.01	140.71	-1.21249	1.37138	1.61302
MH01g0405700	24.63	6.7	4.27	4	-1.87818	-2.52811	-2.62234
MH01g0411000	223.55	68.61	111.5	82.21	-1.70411	-1.00355	-1.44321
MH01g0419800	45.37	4.33	14.24	4.56	-3.3893	-1.67179	-3.31463
MH01g0422800	539.95	162.32	210.67	144.86	-1.73399	-1.35784	-1.89817
MH01g0430500	4.18	20.6	16.37	16.04	2.30107	1.96948	1.9401
MH01g0443100	8.62	127.93	17.94	45.18	3.89152	1.05742	2.38992
MH01g0445300	1.56	30.63	9.72	16.99	4.29533	2.63941	3.44507
MH01g0458700	0.69	67.78	7.87	16.96	6.61812	3.5117	4.6194
MH01g0461100	1200.17	305.44	235.45	121.63	-1.97428	-2.34975	-3.30267
MH01g0471500	5.84	28.6	17.82	34.99	2.29197	1.60946	2.5829
MH01g0484500	0.79	38.98	8.03	11.96	5.62474	3.34548	3.92022
MH01g0484800	8.91	47.49	31.21	104.99	2.41413	1.80851	3.55868
MH01g0485600	54.15	341.79	116.4	147.32	2.65808	1.10406	1.44392
MH01g0487800	13.29	28.95	29.21	31.39	1.12322	1.13612	1.23996
MH01g0503500	140.06	26.91	57.53	65.58	-2.37983	-1.28366	-1.09472
MH01g0512100	15.01	3	2.48	0.71	-2.32289	-2.59751	-4.40196
MH01g0515000	30.77	89.54	86.44	296.3	1.54101	1.49017	3.26746
MH01g0520400	28.73	5.97	2.14	3.34	-2.26676	-3.74688	-3.10464
MH01g0524500	1.29	7.74	7.47	7.83	2.58496	2.53374	2.60164
MH01g0537100	51.2	140.25	124.15	180.72	1.45379	1.27787	1.81954
MH01g0540900	41.93	14.34	15.82	11.27	-1.54794	-1.40623	-1.8955
MH01g0544200	9.02	94.09	20.4	28.46	3.38284	1.17737	1.65774
MH01g0566500	9.42	29.7	34.36	39.6	1.65666	1.86693	2.0717
MH01g0572600	26.68	115.79	99.11	150.86	2.11768	1.89327	2.49938
MH01g0581100	2.19	12.01	11.43	21.4	2.45523	2.38382	3.28861
MH01g0583800	14.76	215.53	65.43	106.95	3.86812	2.14826	2.85717
MH01g0590500	6.95	67.97	22.01	38.47	3.28981	1.66307	2.46865
MH01g0610000	54.08	183.87	132.85	133.73	1.76552	1.29663	1.30616
MH01g0655800	147.11	19.96	64.91	69.43	-2.88171	-1.18038	-1.08326
MH01g0656500	0.69	129.31	7.56	14.27	7.55002	3.45372	4.37025
MH01g0673800	6.11	95.37	28.83	74.2	3.96429	2.23833	3.60217
MH01g0677300	5.86	35.36	14.24	21.36	2.59315	1.28098	1.86594
MH01g0677800	5.9	42.15	15.59	21.86	2.83675	1.40183	1.88951
MH01g0680900	17.68	125.23	38.8	42.17	2.82439	1.13394	1.2541
MH01g0681300	11.77	3.94	3.02	2.57	-1.57885	-1.96249	-2.19527
MH01g0691900	28.52	2.3	10.91	6.63	-3.63227	-1.38632	-2.10489
MH01g0698400	5.77	47.93	17	57.11	3.05429	1.55889	3.3071
MH01g0702400	0.96	6.63	6.56	8.19	2.7879	2.77259	3.09276
MH01g0710100	13.16	38.88	27.41	39.82	1.56287	1.05854	1.59733
MH01g0727100	44.98	6.82	13.63	13.11	-2.72144	-1.7225	-1.77862
MH01g0728000	263.24	10.88	68.6	30.42	-4.59663	-1.9401	-3.11329
MH01g0734100	2.68	26.91	12.79	12.62	3.32784	2.25471	2.23541
MH01g0738500	2.3	10.64	9.49	12.2	2.20979	2.04477	2.40718
MH01g0742400	30.38	4.99	13.24	14.23	-2.60601	-1.19822	-1.09419
MH01g0743900	33.78	7.13	13.15	11.96	-2.2442	-1.36111	-1.49795
MH01g0752800	42.42	19.3	11.39	6.76	-1.13614	-1.89698	-2.64965
MH01g0752900	3133.02	1369.01	695.63	268.45	-1.19442	-2.17116	-3.54483
MH01g0761600	79.1	19.67	37.7	33.51	-2.00768	-1.06911	-1.23909
MH01g0779200	132.35	51.08	48.04	49.92	-1.37353	-1.46205	-1.40667
MH01g0780200	12.61	155.69	29.97	70.28	3.62604	1.24895	2.47855
MH01g0786200	167.19	17.03	3.67	2.06	-3.29534	-5.50956	-6.3427
MH01g0787900	55.84	9.62	13.59	7.32	-2.53719	-2.03875	-2.93138
MH01g0791000	6.92	32.84	34.66	51.16	2.24661	2.32443	2.88617
MH01g0791100	0	3.27	3.03	11.18	14.997	14.887	16.7706
MH01g0804900	48.34	7.08	100.04	124.96	-2.7714	1.04929	1.37018
MH01g0805800	55.07	11.87	4.97	1.33	-2.21395	-3.46995	-5.37177
MH01g0811900	141.86	7.58	30.32	60.6	-4.22613	-2.22613	-1.22708
MH01g0813500	92.44	0.55	12.1	1.38	-7.39294	-2.93351	-6.06578
MH02g0010100	55.12	0.93	11.41	4.09	-5.8892	-2.27228	-3.7524
MH02g0010900	68.91	23.36	30.24	18.37	-1.56067	-1.18826	-1.90736
MH02g0016700	0.94	8.13	10.73	12.78	3.11252	3.51285	3.76508
MH02g0024100	10.24	0.11	2.2	2.41	-6.54057	-2.21864	-2.08711
MH02g0031200	19.15	195.92	58.42	87.41	3.35485	1.60912	2.19045
MH02g0035600	104.94	21.13	39.41	22.42	-2.3122	-1.41293	-2.22671
MH02g0044900	0.6	48.59	11.35	12.99	6.33955	4.24159	4.4363
MH02g0045300	59.27	8.43	18.21	11.6	-2.8137	-1.70257	-2.35318
MH02g0066900	4.46	41.68	24.27	44.58	3.22424	2.44406	3.32128
MH02g0071700	19.46	51.12	68.78	253.3	1.39338	1.82148	3.70226
MH02g0072700	8.62	154.02	23.82	36.77	4.15929	1.46641	2.09277
MH02g0077100	8.93	141.83	26.84	56.41	3.98936	1.58765	2.65922
MH02g0088200	27.95	7.04	7.49	9.14	-1.9892	-1.89981	-1.61258
MH02g0094800	16.44	54.53	33.52	54.98	1.72984	1.02781	1.7417
MH02g0096400	54.69	22.9	16.12	9.94	-1.25593	-1.76243	-2.45996
MH02g0099800	1230.62	556.78	282.53	179.47	-1.14421	-2.12291	-2.77757
MH02g0107500	1.51	77.95	13.73	17.91	5.68993	3.18471	3.56814
MH02g0108300	24.41	71.33	71.75	68.85	1.54704	1.55551	1.49598
MH02g0112000	3.5	11.8	17.49	23.76	1.75336	2.3211	2.76311
MH02g0116000	0	17.37	2.68	9.37	17.4062	14.7099	16.5158
MH02g0117400	88.44	5.96	40.86	36.15	-3.89131	-1.11401	-1.2907
MH02g0144800	20.37	1.04	5.58	4.88	-4.29179	-1.86811	-2.06149
MH02g0147800	382.94	21.44	16.37	20.65	-4.15874	-4.54799	-4.2129
MH02g0167600	0.82	164.52	10.8	21.24	7.64842	3.71926	4.69502
MH02g0172200	163.17	51.63	4.04	5.41	-1.66009	-5.33588	-4.9146
MH02g0202200	0.35	6.32	5.63	7.4	4.1745	4.00771	4.4021
MH02g0244000	20.76	66.94	64.33	74.87	1.68906	1.63169	1.85058
MH02g0262000	133.9	20.84	58.33	64.45	-2.68373	-1.19885	-1.0549
MH02g0304400	118.59	55.28	55.12	49.45	-1.10115	-1.10533	-1.26194
MH02g0306900	3.91	18.62	12.21	42.36	2.25161	1.64282	3.43746
MH02g0314600	15.12	3.23	6.99	4.02	-2.22685	-1.11309	-1.91119
MH02g0330300	2.14	129.23	16.42	22.58	5.91619	2.93977	3.39936
MH02g0342100	45.55	1.53	14.36	8.55	-4.89585	-1.6654	-2.41345
MH02g0385400	3.07	9.37	11.37	12.59	1.60981	1.88892	2.03597
MH02g0405300	2.11	7.17	6.72	8.34	1.76473	1.67122	1.9828
MH02g0424000	1.04	7.06	7.98	7.81	2.76308	2.93981	2.90874
MH02g0428800	7.17	0	0.66	1.03	-16.1297	-3.44144	-2.79933
MH02g0440900	3.57	26.05	11.15	9.11	2.86729	1.64305	1.35153
MH02g0444700	16.3	98.96	34.41	50.56	2.60197	1.07796	1.63312
MH02g0476800	24.57	73.13	51.25	57.66	1.57357	1.06065	1.23067
MH02g0480700	32.26	361.52	78.94	115.39	3.48626	1.29101	1.8387
MH02g0485200	2.5	0.45	21.48	19.18	-2.47393	3.10299	2.9396
MH02g0486800	19.81	1.07	0	0	-4.21055	-17.5959	-17.5959
MH02g0499600	3.59	13.31	12.08	10.36	1.89045	1.75056	1.52897
MH02g0500700	52.77	8.36	14.16	5.94	-2.65814	-1.8979	-3.15118
MH02g0505100	24.95	98.65	56.81	73.77	1.98328	1.18711	1.56399
MH02g0508400	6.02	220.82	27.22	31.35	5.19696	2.17683	2.38063
MH02g0523500	0	2.04	2.94	3.71	14.3163	14.8435	15.1791
MH02g0538400	5.92	12.21	26.39	56.95	1.04439	2.15632	3.26603
MH02g0556200	1.59	18.49	8.09	14.37	3.53965	2.34711	3.17596
MH02g0567300	2.66	30.77	15.1	9.42	3.53203	2.50505	1.8243
MH02g0568600	9.03	21.19	20.65	23.72	1.23059	1.19334	1.39331
MH02g0581800	6.31	61.22	29.4	92.65	3.27829	2.2201	3.87608
MH02g0587500	10.74	54.19	43.37	34.3	2.33503	2.0137	1.67521
MH02g0598500	388.78	138.29	140.47	141.33	-1.49126	-1.46869	-1.45989
MH02g0600000	54.35	8.6	13.4	19.29	-2.65987	-2.02005	-1.49443
MH02g0607400	0.95	7.33	9.59	19.65	2.94781	3.33553	4.37046
MH02g0622000	130.11	18.04	47.98	18.92	-2.85046	-1.43923	-2.78175
MH02g0622400	4.99	12.83	35.06	41.93	1.36241	2.81271	3.07087
MH02g0624500	1.64	1279.64	13.11	14.41	9.60783	2.9989	3.1353
MH02g0645600	16.35	66	36.92	48.6	2.01318	1.17511	1.57167
MH02g0659300	1.83	11.53	7.81	6.92	2.65548	2.09348	1.91893
MH02g0661200	12.61	71.85	33.98	47.51	2.51042	1.43012	1.91366
MH02g0669200	6.02	44.41	45.22	112.96	2.88305	2.90913	4.2299
MH02g0670200	12.39	46.24	31.18	32.48	1.89997	1.33144	1.39038
MH02g0673200	102.36	48.96	46.96	43.16	-1.06398	-1.12415	-1.24589
MH02g0691800	2.69	12.08	9.09	22.03	2.16694	1.75667	3.03379
MH02g0698200	48.64	5.83	21.82	18	-3.06058	-1.15649	-1.43415
MH02g0698300	258.61	38.26	118.53	103.56	-2.75687	-1.12553	-1.32031
MH02g0702500	28.85	4.12	12.01	7.49	-2.80786	-1.26434	-1.94553
MH02g0707800	52.12	12.08	23.04	20.43	-2.10922	-1.1777	-1.35115
MH03g0013900	6.29	99.34	30.19	66.36	3.98124	2.26294	3.39918
MH03g0018700	9.96	121.15	37.64	38.14	3.6045	1.91805	1.93709
MH03g0025300	49.61	16.65	17.26	16.79	-1.57511	-1.5232	-1.56303
MH03g0025400	2.04	71.89	26.98	47.86	5.13915	3.72525	4.55218
MH03g0036900	47.87	23.48	18.24	21.65	-1.02769	-1.39202	-1.14475
MH03g0037300	7.76	69.64	25.92	37.41	3.16579	1.73994	2.2693
MH03g0039300	4.23	23.51	11.2	11.41	2.47454	1.40477	1.43157
MH03g0041100	0.98	9.59	9.55	17.69	3.29068	3.28465	4.17401
MH03g0043400	7.02	47.47	30.42	51.18	2.75747	2.11548	2.86604
MH03g0054800	32.45	6.41	8.25	5.48	-2.33982	-1.97575	-2.56597
MH03g0055100	5.72	170.61	61.64	297.82	4.89854	3.42978	5.70228
MH03g0068800	18.49	1.12	1.2	3.01	-4.04517	-3.94564	-2.61891
MH03g0070700	201.16	19.54	54.13	55.06	-3.36384	-1.89384	-1.86927
MH03g0075700	10.17	1.78	3.66	1.26	-2.51437	-1.4744	-3.01282
MH03g0084100	1.78	25.45	15.58	28.14	3.83772	3.12975	3.98267
MH03g0084200	17.06	80.01	34.46	137.51	2.22956	1.01431	3.01085
MH03g0084500	30.46	6.38	4.21	2.86	-2.25529	-2.85502	-3.41283
MH03g0093300	15.57	61.54	54.18	152.15	1.98276	1.79899	3.28865
MH03g0095400	23.1	269.2	49.99	95.63	3.54271	1.11375	2.04957
MH03g0096800	49.37	3.76	8.1	7.04	-3.71483	-2.60764	-2.80999
MH03g0114500	11.26	33.76	28.2	25.5	1.58411	1.32449	1.17929
MH03g0117300	8.4	150.48	19.71	27	4.16304	1.23047	1.6845
MH03g0122300	10.82	22.07	24.17	35.64	1.02839	1.15952	1.7198
MH03g0126400	2.22	32.52	18.97	23.75	3.8727	3.09509	3.4193
MH03g0126900	14.4	64.97	46.86	109.88	2.1737	1.70229	2.93179
MH03g0127000	15.75	67.69	49.77	326.4	2.10359	1.65992	4.37322
MH03g0129200	2.52	10.92	6.34	8.18	2.11548	1.33106	1.69868
MH03g0133900	5.14	28.53	15.19	18.43	2.47264	1.56328	1.84222
MH03g0140200	2.8	12.86	12.05	18.79	2.19939	2.10553	2.74647
MH03g0153500	16.98	3.64	7.42	4.29	-2.22183	-1.19435	-1.98479
MH03g0160400	8.53	110.19	43.44	44.29	3.6913	2.34841	2.37636
MH03g0161100	30.53	649.59	83.46	136.93	4.41123	1.45086	2.16514
MH03g0161900	10.53	221.04	38.83	46.65	4.39173	1.88267	2.14737
MH03g0164800	6.79	16.82	24.98	21.96	1.30869	1.87929	1.69339
MH03g0171000	8.07	902.59	29.08	55.23	6.80536	1.84939	2.77481
MH03g0178200	154.12	74.78	38.5	28.14	-1.04333	-2.00112	-2.45336
MH03g0179300	9.85	95.55	31.66	43.47	3.27806	1.68447	2.14182
MH03g0183200	1.25	12.25	7.52	17.71	3.29278	2.5888	3.82456
MH03g0194000	1.05	6.3	3.37	5.13	2.58496	1.68236	2.28857
MH03g0211100	0	9.01	5.83	31.32	16.4592	15.8312	18.2567
MH03g0216800	2.66	29.86	8	15.24	3.48872	1.58857	2.51836
MH03g0223300	10.08	25.11	46.07	78.95	1.31677	2.19233	2.96944
MH03g0282200	18.42	229.8	70.58	66.97	3.64103	1.93799	1.86224
MH03g0321000	113.13	39.39	640.2	1715.74	-1.52208	2.50054	3.92278
MH03g0321400	5.63	86.25	71.53	197.09	3.93732	3.66734	5.12958
MH03g0323600	5.14	49.74	32.08	42.54	3.27457	2.64183	3.04898
MH03g0338700	9.84	3.79	3.31	3.39	-1.37646	-1.57183	-1.53737
MH03g0343800	42.91	16.21	8.56	7.16	-1.40443	-2.32563	-2.58328
MH03g0371600	9.25	32.81	21.25	42.44	1.82661	1.19994	2.1979
MH03g0426100	16.81	59.77	42.55	50.67	1.8301	1.33984	1.59181
MH03g0438900	13.8	99.92	43.16	63.12	2.85611	1.64503	2.19343
MH03g0450600	461.93	221.45	122.15	85.68	-1.06069	-1.91902	-2.43064
MH03g0457500	5.54	13.6	16.78	33.39	1.29565	1.59878	2.59146
MH03g0458000	23.45	48.84	55.48	47.53	1.05848	1.24238	1.01925
MH03g0459200	4.28	65.96	24.24	32.18	3.94591	2.50171	2.91048
MH03g0499200	32.92	13.03	112.11	92.11	-1.33713	1.76788	1.48439
MH03g0508700	37.77	1.19	5.58	1.41	-4.98821	-2.7589	-4.74347
MH03g0516000	2.1	35.58	27.94	26.67	4.08261	3.73387	3.66676
MH03g0539100	6.01	14.47	17.55	45.24	1.26763	1.54603	2.91216
MH03g0544900	23.11	4.58	3.83	1.03	-2.3351	-2.5931	-4.4878
MH03g0546000	9.52	64.47	47.54	57.22	2.75959	2.32011	2.58749
MH03g0548000	22.57	58.08	58.61	64.47	1.36364	1.37674	1.51422
MH03g0595800	1.02	29.2	7.26	35.83	4.83933	2.8314	5.13453
MH03g0596200	12.41	188.98	54.41	415.79	3.92866	2.13237	5.06628
MH03g0612400	196.79	66.93	77.64	92.57	-1.55593	-1.34178	-1.08804
MH03g0614300	137.2	56.79	60.37	51.77	-1.27257	-1.18438	-1.40609
MH03g0618200	38.61	190.73	91.67	115.31	2.30449	1.24748	1.57847
MH03g0657100	19.98	48.72	45.51	150.59	1.28596	1.18763	2.914
MH03g0658100	55.85	622.27	196.34	132.95	3.47791	1.81372	1.25125
MH03g0658900	4.98	14.01	10.28	10.07	1.49224	1.04562	1.01585
MH03g0660100	135.19	39.51	66.38	66.39	-1.7747	-1.02617	-1.02595
MH03g0660600	209.93	40.13	45.85	48.37	-2.38716	-2.19491	-2.11772
MH03g0672400	16.86	35.13	40.26	69.33	1.0591	1.25574	2.03988
MH03g0673100	18.49	1.69	7.89	7.2	-3.45165	-1.22865	-1.36068
MH03g0677000	15.4	329.65	33.94	74.71	4.41993	1.14006	2.27837
MH03g0683000	40.27	210.16	89.82	110.21	2.38371	1.15733	1.45248
MH03g0694400	36.47	10.64	15.04	11.86	-1.77721	-1.27791	-1.62061
MH03g0716600	25.26	57.45	91.51	110.07	1.18545	1.85707	2.12349
MH03g0718400	38.02	768.06	232.55	605.77	4.33639	2.61271	3.99394
MH03g0718500	0.89	11.63	5.58	8.49	3.7079	2.64839	3.25389
MH03g0721000	3.04	52.24	16.4	17.5	4.10301	2.43155	2.52521
MH03g0728200	23.44	366.89	81.02	147.69	3.9683	1.78931	2.65553
MH03g0730400	6.02	19.52	19.65	29.32	1.69712	1.70669	2.28405
MH03g0731600	105.8	43.46	36.77	41.03	-1.28358	-1.52474	-1.36659
MH03g0734800	44.4	190.53	138.39	145.35	2.10139	1.64011	1.7109
MH03g0736000	0.72	8.38	6.98	5.47	3.54088	3.27716	2.92547
MH03g0736900	33.72	5.53	13.44	8.39	-2.60825	-1.32707	-2.00686
MH03g0747000	17.11	86.57	73.2	135.18	2.33903	2.097	2.98197
MH03g0749700	0	41.04	3.49	15.61	18.6467	15.0909	17.2521
MH03g0749800	10.95	65.82	30.42	52.61	2.5876	1.47409	2.26441
MH04g0040900	3.07	0.39	0.32	0.7	-2.97669	-3.26209	-2.13281
MH04g0070500	6.71	46.67	14.75	16.13	2.79811	1.13633	1.26536
MH04g0128700	3.77	27.06	7.99	12.22	2.84353	1.08363	1.69661
MH04g0135000	6.02	15.46	15	13.68	1.3607	1.31713	1.18423
MH04g0199300	0.73	37.49	5.6	12.63	5.68247	2.93946	4.11281
MH04g0213900	0	8.7	1.84	4.21	16.4087	14.1674	15.3615
MH04g0224000	1.76	44.42	18.37	24.93	4.65756	3.3837	3.82424
MH04g0232500	19.94	103.21	55.5	72.4	2.37185	1.47682	1.86032
MH04g0248600	171.34	77.89	57.79	61.31	-1.13735	-1.56797	-1.48267
MH04g0271700	13.21	1.08	4.19	4.58	-3.61253	-1.65661	-1.52821
MH04g0309000	0.62	317.43	10.97	20.53	8.99995	4.14515	5.04932
MH04g0348700	4.51	0	0.61	0.57	-15.4608	-2.88625	-2.98409
MH04g0353400	8.39	25.22	32.88	41.12	1.58783	1.97047	2.2931
MH04g0355200	51.33	16.72	133.79	181.29	-1.61823	1.3821	1.82043
MH04g0363400	11.32	25.09	41.1	259.77	1.14824	1.86026	4.52029
MH04g0381300	10.77	85.44	24.61	64.16	2.98789	1.19223	2.57466
MH04g0400400	9.88	22.63	26.32	49.26	1.19565	1.41358	2.31783
MH04g0402000	51.09	7.76	12.02	7.34	-2.71891	-2.0876	-2.79919
MH04g0402300	1.83	50.72	14.98	29.07	4.79264	3.03312	3.98962
MH04g0408600	857.99	256.69	369.13	321.47	-1.74093	-1.21683	-1.41628
MH04g0431400	27.34	11.18	11.87	10.92	-1.29009	-1.20369	-1.32404
MH04g0493400	0.67	10.13	6.76	21.55	3.91833	3.33479	5.00738
MH04g0497500	101.88	33.18	33.02	31.96	-1.61849	-1.62546	-1.67253
MH04g0507900	13.45	50.97	33.28	62.96	1.92204	1.30705	2.22683
MH04g0511200	1.12	70.2	27.08	50.71	5.9699	4.59566	5.5007
MH04g0513900	18.46	52.25	37.81	53.09	1.50103	1.03437	1.52404
MH04g0519100	5.7	34.74	20.89	24.67	2.60756	1.87378	2.11372
MH04g0532100	123.38	9.23	53.92	38.44	-3.74063	-1.19422	-1.68243
MH04g0532900	1.15	12.95	9.46	15.22	3.49325	3.04021	3.72626
MH04g0543100	4.12	19.42	19.85	20.05	2.23683	2.26842	2.28289
MH04g0544100	16.33	175.94	69.55	79.68	3.42949	2.09053	2.28669
MH04g0544800	10.96	30.22	42.97	58.1	1.46326	1.97108	2.40629
MH04g0548300	4.45	11.47	10.3	12.58	1.36599	1.21077	1.49925
MH04g0550200	6.75	37.17	28.23	54.33	2.46118	2.06427	3.00879
MH04g0591000	8.07	26.63	34.15	31.97	1.72241	2.08124	1.98608
MH04g0599300	53.68	0.47	5.13	16.55	-6.83558	-3.38735	-1.69755
MH04g0599600	10.13	2.11	1.76	3.95	-2.26332	-2.52499	-1.35871
MH04g0600900	36.58	4.2	9.81	4.24	-3.12259	-1.89873	-3.10892
MH04g0603000	29.76	4.59	8.06	2.61	-2.69681	-1.88452	-3.51125
MH04g0604300	216.66	49.44	79.22	70.68	-2.13168	-1.4515	-1.61606
MH04g0613000	4.51	125.65	18.44	51.1	4.80014	2.03164	3.50212
MH04g0620500	177.8	32.6	59.85	67.44	-2.44731	-1.57083	-1.39858
MH04g0625200	28.95	79.88	83.52	102.34	1.46427	1.52856	1.82173
MH04g0625800	40.37	14.67	19.23	16.35	-1.46041	-1.06992	-1.30399
MH04g0627300	4.26	75.59	21.62	46.79	4.14927	2.34344	3.45727
MH04g0641200	1.37	8.32	5.04	11.8	2.60241	1.87925	3.10654
MH04g0659400	356.64	1.69	8.73	4.77	-7.7213	-5.35234	-6.22434
MH04g0660500	29.92	11.52	14.64	10.51	-1.37697	-1.03119	-1.50935
MH04g0665300	64.92	173.6	171.53	195.07	1.41903	1.40173	1.58726
MH04g0676900	15.41	39.14	33.6	42.41	1.34478	1.12459	1.46054
MH04g0677500	59.53	21.92	28.3	23.59	-1.44137	-1.07281	-1.33544
MH04g0681100	7.49	120.99	54.8	137.11	4.01378	2.87114	4.19422
MH04g0687100	9.99	58.78	32.52	33.32	2.55677	1.70277	1.73783
MH04g0701900	12.9	205.43	31.15	71.38	3.9932	1.27186	2.46815
MH04g0704200	48.78	23.71	229.21	921.65	-1.04079	2.23231	4.23986
MH04g0704300	16.66	55.96	95.09	141.8	1.74801	2.51291	3.0894
MH04g0707800	22.45	8.25	65.54	55.66	-1.44425	1.54566	1.30993
MH05g0011600	8	0	0	0	-16.2877	-16.2877	-16.2877
MH05g0018800	0.58	11.27	5.07	10.06	4.28029	3.12786	4.11643
MH05g0020200	10.03	3.43	4.26	4.5	-1.54804	-1.2354	-1.15632
MH05g0036100	19.93	1.13	2.04	4.19	-4.14055	-3.2883	-2.24992
MH05g0043100	10.65	5.01	4.55	5.18	-1.08797	-1.22691	-1.03983
MH05g0047600	510.41	74.04	118.95	97.66	-2.78528	-2.1013	-2.38582
MH05g0053200	32.15	320.04	193.23	228.23	3.31536	2.58743	2.8276
MH05g0053400	43.69	503.07	283.02	322.36	3.52538	2.69553	2.8833
MH05g0085600	2.21	37.83	29.19	32.36	4.09741	3.72336	3.87209
MH05g0086200	3.16	10.32	9.32	10.43	1.70745	1.56041	1.72274
MH05g0088500	4.01	0	0	0	-15.2913	-15.2913	-15.2913
MH05g0105700	494.04	25.4	70.17	42.99	-4.28173	-2.8157	-3.52255
MH05g0131100	7.16	34.11	25.84	41.38	2.25216	1.85157	2.5309
MH05g0144700	165.65	69.32	54.93	41.23	-1.25679	-1.59247	-2.00637
MH05g0145500	4.07	14.56	11.98	17.98	1.83891	1.55753	2.14329
MH05g0186700	4.77	1.05	11.05	24.06	-2.1836	1.21199	2.33458
MH05g0241500	7.47	39.84	20.41	26.62	2.41504	1.4501	1.83333
MH05g0279900	34.62	266.7	230.97	455.99	2.94554	2.73803	3.71932
MH05g0284600	5.67	17.53	13.04	18.73	1.62841	1.20152	1.72393
MH05g0326000	1219.5	500.89	608.64	441.11	-1.28372	-1.00263	-1.46708
MH05g0331400	35.94	13.65	10.7	3.34	-1.39669	-1.74798	-3.42767
MH05g0332500	21.59	9.38	5.29	5.98	-1.2027	-2.02902	-1.85215
MH05g0337900	7.52	0.89	2.8	1.9	-3.07886	-1.42531	-1.98473
MH05g0343000	22.3	91.76	147.47	170.44	2.04082	2.72531	2.93415
MH05g0353600	3.46	7.25	13.05	15.29	1.06721	1.91521	2.14374
MH05g0361700	0.1	17.83	1.83	3.33	7.47816	4.19377	5.05745
MH05g0378200	5.43	31.76	57.56	191.23	2.54819	3.40604	5.13821
MH05g0404100	50.5	13.1	14.55	19.86	-1.94672	-1.79526	-1.34642
MH05g0411100	26.52	65.98	133.28	132.13	1.31495	2.32931	2.31681
MH05g0417000	117.94	41.05	45.79	57.45	-1.5226	-1.36495	-1.03767
MH05g0430300	277.34	0	0	0	-21.4032	-21.4032	-21.4032
MH05g0430700	0.5	7.2	4.93	10.43	3.848	3.30159	4.38267
MH05g0450000	2.37	17.6	9.38	41.34	2.89262	1.9847	4.12458
MH05g0457900	5.15	12.19	13.81	14.8	1.24305	1.42307	1.52295
MH05g0465500	8.55	23.02	19.21	22.77	1.42889	1.16786	1.41314
MH05g0476500	124.17	370.3	337.8	360.76	1.57638	1.44385	1.53872
MH05g0496400	10.98	164.3	26.02	40.93	3.90338	1.24474	1.89828
MH05g0498600	0.47	20.02	13.25	13.32	5.41264	4.81719	4.82479
MH05g0508800	51.48	20.67	13.01	12.76	-1.31647	-1.98439	-2.01238
MH05g0517600	18.98	3.74	1.06	0.4	-2.34337	-4.16234	-5.56834
MH05g0519200	1.39	14.86	10.64	24.48	3.41828	2.93634	4.13845
MH05g0519400	1.51	18.1	5.28	4.73	3.58337	1.80599	1.64729
MH05g0522000	3.66	19.27	17.81	17.07	2.39644	2.28277	2.22155
MH05g0538600	9.8	31.3	43.97	68.61	1.67531	2.16567	2.80757
MH05g0568500	46.35	14.68	22.96	15.93	-1.65872	-1.01345	-1.54082
MH06g0023400	13.96	175.76	28.53	35.78	3.65424	1.03118	1.35785
MH06g0039300	29.66	61.95	95.16	150.13	1.06259	1.68184	2.33962
MH06g0077000	11.09	0	0	0	-16.7589	-16.7589	-16.7589
MH06g0079200	12.78	0	2.85	3.86	-16.9635	-2.16485	-1.72722
MH06g0091800	29.69	377.15	115.36	393.06	3.66709	1.95809	3.7267
MH06g0101600	2.55	10.65	7.67	9.12	2.06228	1.58873	1.83854
MH06g0102800	0.5	6.07	6.29	10.31	3.6017	3.65306	4.36597
MH06g0107200	0.97	7.18	9.76	11.98	2.88793	3.33082	3.6265
MH06g0155400	6.35	34.17	17.81	23.03	2.4279	1.48786	1.85869
MH06g0175100	92.86	33.92	22.58	24.87	-1.45292	-2.04001	-1.90065
MH06g0213800	3.62	24.04	10	11.67	2.73138	1.46594	1.68874
MH06g0215900	0	13.57	3.21	7.63	17.0501	14.9703	16.2194
MH06g0216000	0	5.28	9.74	14.19	15.6883	16.5716	17.1145
MH06g0217600	18.52	0.27	2.05	1.09	-6.09998	-3.17539	-4.08668
MH06g0227900	30.68	96.12	84.06	98.24	1.64754	1.45412	1.67901
MH06g0235700	1.09	17.93	10.71	7.04	4.03998	3.29656	2.69125
MH06g0238200	13.19	34.66	31.97	32.49	1.39383	1.27727	1.30055
MH06g0247700	15.47	3.73	2.2	3.43	-2.05223	-2.8139	-2.17319
MH06g0248100	43.45	6.78	20.96	19.62	-2.68	-1.05172	-1.14703
MH06g0282600	25.91	8.43	10.31	7.09	-1.6199	-1.32946	-1.86965
MH06g0430900	24.89	11.54	10.14	10.91	-1.10892	-1.29551	-1.18992
MH06g0475100	5.02	35.41	23.93	21.89	2.8184	2.25306	2.12451
MH06g0508500	12.05	36.13	24.84	29.26	1.58416	1.04363	1.2799
MH06g0511600	3.8	20.55	38	562.1	2.43507	3.32193	7.20868
MH06g0529400	42.01	13.35	16.74	12.19	-1.65389	-1.32743	-1.78503
MH06g0553100	1.44	5.62	7.68	14.67	1.9645	2.41504	3.34873
MH06g0554300	2.74	6.5	7.74	27.35	1.24626	1.49816	3.31929
MH06g0569700	0	152.41	20.69	34.69	20.5395	17.6586	18.4042
MH06g0593500	1.68	8.43	10.33	9.5	2.32707	2.62031	2.49947
MH06g0641700	5.57	94.21	18.66	126.57	4.08013	1.7442	4.50611
MH06g0654800	18.79	350.13	54.06	122.9	4.21985	1.5246	2.70945
MH06g0657200	36.85	6.44	14.5	14.17	-2.51653	-1.34561	-1.37882
MH06g0695500	15.58	66.59	36.12	32.29	2.09561	1.2131	1.05139
MH06g0698300	102.04	20.08	48.27	37.51	-2.3453	-1.07994	-1.44379
MH06g0704700	0.97	3.96	5.58	5.38	2.02944	2.52421	2.47155
MH06g0708300	4147.67	499.36	2044.21	1394.55	-3.05415	-1.02076	-1.5725
MH07g0016900	38.07	7.66	19.01	15.86	-2.31324	-1.0019	-1.26326
MH07g0033900	17.82	1.79	2.57	0	-3.31547	-2.79366	-17.4431
MH07g0034100	78.94	2.73	8.3	2.77	-4.85378	-3.24957	-4.8328
MH07g0035000	0	3.02	3.1	7.04	14.8823	14.92	16.1033
MH07g0035700	4.32	1.34	1.89	1.52	-1.6888	-1.19265	-1.50696
MH07g0036400	0.16	4.28	3.8	4.02	4.74147	4.56986	4.65105
MH07g0047900	2218.52	482.31	59.46	25.05	-2.20156	-5.22153	-6.46864
MH07g0048300	62.19	25.89	27.63	23.13	-1.26429	-1.17045	-1.42692
MH07g0048400	33.77	78.96	73.82	93.42	1.22538	1.12827	1.46799
MH07g0061300	0.89	8.04	4.15	3.89	3.17532	2.22123	2.12789
MH07g0079800	9.79	1.14	3.45	2	-3.10228	-1.50471	-2.29131
MH07g0092100	0.78	37.52	60.09	138.51	5.58804	6.26751	7.4723
MH07g0094200	32.44	15.65	6.33	4.52	-1.05161	-2.3575	-2.84338
MH07g0095000	115.97	29.7	49.45	31.59	-1.96522	-1.22971	-1.87621
MH07g0105000	4.4	131.95	13.5	45.6	4.90634	1.61738	3.37346
MH07g0111000	345.84	123.43	60.19	33.58	-1.48641	-2.52251	-3.36443
MH07g0118000	13.47	29.09	37.8	40.23	1.11077	1.48864	1.57852
MH07g0137200	8.13	133.98	32.55	38.82	4.04262	2.00133	2.25547
MH07g0143700	34.52	103.06	167.63	189.11	1.57798	2.27978	2.45372
MH07g0156200	4.81	17.58	16.54	16.67	1.86983	1.78185	1.79315
MH07g0223700	27.68	8.24	13.79	3.92	-1.74813	-1.00522	-2.81992
MH07g0247300	0	30.86	9.25	11.04	18.2354	16.4972	16.7524
MH07g0268000	12.78	0.71	1.73	3.79	-4.16993	-2.88504	-1.75362
MH07g0279000	3.14	11.89	7.37	10.75	1.92091	1.2309	1.7755
MH07g0326300	209.79	34.41	82.12	82.83	-2.60805	-1.35314	-1.34072
MH07g0327800	124.17	42.91	52.71	39.66	-1.53293	-1.23617	-1.64656
MH07g0330400	2.04	10	14.2	29.55	2.29336	2.79925	3.85652
MH07g0411900	2.29	8.06	5.98	6.36	1.81543	1.3848	1.47368
MH07g0436700	26.62	12.89	7.13	4.35	-1.04626	-1.90054	-2.61342
MH07g0467300	2.69	43.1	10.56	19.28	4.00201	1.97293	2.84143
MH07g0474300	140.85	33.05	53.68	60.07	-2.09144	-1.3917	-1.22944
MH07g0482300	9.65	93.61	45.78	42.85	3.27806	2.24612	2.15069
MH07g0483700	9.88	55.23	45.76	93.3	2.48287	2.2115	3.23929
MH07g0486000	87	15.55	29.94	20.26	-2.4841	-1.53894	-2.10238
MH07g0489000	9.28	198.46	40.59	53.59	4.41858	2.12893	2.52977
MH07g0496700	9.11	136.19	48.71	59.51	3.90203	2.4187	2.70761
MH07g0501400	2.41	9.28	8.41	14.74	1.94509	1.80307	2.61263
MH07g0509000	3.12	26.08	8.23	16.57	3.06333	1.39935	2.40896
MH07g0518400	15.57	36.68	36.46	38.97	1.23622	1.22755	1.32359
MH07g0532200	28.75	1.73	2.94	2.5	-4.05472	-3.28967	-3.52356
MH07g0536500	234.64	34.99	35.58	52.27	-2.74543	-2.72131	-2.16639
MH07g0538300	3.88	9.7	15.48	33.06	1.32193	1.99628	3.09096
MH07g0541500	27.31	9.81	10.58	4.64	-1.4771	-1.36809	-2.55723
MH07g0546500	27.6	12.64	13.06	11.02	-1.12667	-1.07951	-1.32454
MH07g0547200	3.17	14.15	16.33	18.05	2.15825	2.36497	2.50944
MH07g0550900	101.57	443.01	266.26	235.36	2.12486	1.39036	1.21239
MH07g0551600	107.34	15.09	16.15	11.74	-2.83052	-2.73258	-3.19268
MH07g0551800	2.05	8.52	8.34	15.79	2.05523	2.02442	2.94532
MH08g0015000	74.24	3.76	26.31	23.21	-4.30339	-1.49659	-1.67745
MH08g0029900	128.01	314.34	377.16	573.86	1.29607	1.55892	2.16444
MH08g0066700	15.88	1.8	2.43	2.27	-3.14114	-2.70818	-2.80645
MH08g0115600	3.02	12.95	35.97	18.31	2.10033	3.57417	2.60001
MH08g0121600	16.63	5.79	7.64	4.47	-1.52215	-1.12214	-1.89544
MH08g0178900	2.65	70.17	10.53	14.86	4.72679	1.99044	2.48737
MH08g0242800	198.14	56.01	76.77	62.75	-1.82276	-1.36791	-1.65883
MH08g0249400	35.62	6.34	14.88	7.64	-2.49013	-1.25931	-2.22104
MH08g0380600	24.87	248.33	93.75	196.57	3.31978	1.91441	2.98256
MH08g0419700	3.03	22.3	20.91	40.62	2.87965	2.7868	3.7448
MH08g0426400	3675.12	1594.9	1636.98	1027.22	-1.20433	-1.16675	-1.83905
MH08g0448500	0.24	21.35	9.42	12.99	6.47506	5.29462	5.75822
MH08g0460900	15.29	122.73	43.02	44.71	3.00483	1.49242	1.54801
MH08g0464200	0.84	4.85	4.08	4.36	2.52952	2.28011	2.37587
MH08g0475600	69.52	33.18	28.9	31.34	-1.06711	-1.26636	-1.14942
MH08g0476500	34.89	386.32	171.49	404.07	3.46891	2.29724	3.53372
MH08g0491200	6.57	1759.43	34.86	60.1	8.065	2.40761	3.1934
MH08g0491300	2.18	70.6	11.34	19.93	5.01727	2.37902	3.19254
MH08g0493400	54.28	171.42	5.37	12.67	1.65904	-3.33743	-2.099
MH08g0506500	18.62	219.03	82.16	123.29	3.5562	2.14158	2.72713
MH08g0506700	7.42	45.71	22.93	102.05	2.62302	1.62775	3.78171
MH08g0507700	0.45	5.19	5.37	19.89	3.52774	3.57693	5.46597
MH08g0509300	38.74	183.86	122.74	206	2.24671	1.66371	2.41075
MH08g0509600	44.64	166.25	127.59	208.16	1.89695	1.51511	2.22128
MH08g0512700	148.72	52.58	72.65	53.54	-1.50001	-1.03356	-1.47391
MH08g0522800	24.04	550.25	59.75	68.56	4.51658	1.3135	1.51193
MH08g0522900	44.67	9.47	22.2	14.93	-2.23787	-1.00875	-1.58109
MH08g0529100	132.92	557.19	268.24	281.12	2.06761	1.01297	1.08063
MH08g0573100	26.44	4.13	70.9	84.03	-2.67851	1.42306	1.66818
MH09g0140500	20.11	7.12	5.98	7.8	-1.49796	-1.7497	-1.36637
MH09g0148800	16.59	57.75	58.6	39.32	1.79951	1.82059	1.24495
MH09g0198300	193.51	46.45	642.08	1072.05	-2.05866	1.73034	2.46989
MH09g0218600	5.8	31.96	17.15	27.68	2.46214	1.56408	2.25472
MH09g0241500	11.53	52.26	35.71	68.1	2.18031	1.63094	2.56226
MH09g0243900	3.67	29.51	41.34	35.13	3.00735	3.49369	3.25885
MH09g0249700	2.08	18	15.13	16.93	3.11334	2.86276	3.02493
MH09g0263100	0	103.28	27.43	71.26	19.9781	18.0654	19.4427
MH09g0315000	6.79	276.21	53.43	94.93	5.34621	2.97617	3.80538
MH09g0319200	4.38	23.38	12.62	29.16	2.41627	1.52671	2.73499
MH09g0320100	27.07	306.78	172.92	191.04	3.50244	2.67534	2.81911
MH09g0320200	43.31	139.3	352.57	458.9	1.68542	3.02514	3.40541
MH09g0336900	303.14	142.58	92.35	129	-1.08821	-1.7148	-1.23261
MH09g0351600	35.53	145.25	111.85	182.08	2.03143	1.65446	2.35746
MH09g0352300	0.75	68.82	6.28	5.63	6.51979	3.0658	2.90817
MH09g0354400	0	35.45	4.97	20.4	18.4354	15.601	17.6382
MH09g0361900	21.37	1.4	1.51	2.83	-3.93209	-3.82297	-2.91671
MH09g0365800	13.4	74.32	32.26	49.25	2.47152	1.26751	1.87789
MH09g0382600	1.24	10.47	8.88	16.63	3.07785	2.84022	3.74538
MH09g0385700	1.39	18.57	6.69	7.27	3.73982	2.26692	2.38687
MH09g0403400	8.61	33.22	22.27	64.15	1.94797	1.37102	2.89736
MH09g0403600	9.67	564.91	31.56	64.5	5.86836	1.70651	2.73771
MH09g0406600	1.01	4	5.14	4.81	1.98564	2.34741	2.25168
MH09g0418200	5.85	15.87	15.34	23.64	1.43979	1.39079	2.01472
MH09g0430600	0.47	3.18	3.19	21.68	2.75829	2.76282	5.52756
MH09g0431200	44.14	7.28	14.5	17.25	-2.60008	-1.60603	-1.35549
MH09g0436500	0	45.56	4.71	8.08	18.7974	15.5234	16.3021
MH09g0436700	9.28	23.49	27.63	35.35	1.33985	1.57404	1.92951
MH09g0437800	114.09	7.88	12.13	8.56	-3.85583	-3.23352	-3.73642
MH09g0447900	814.54	126.54	372.68	393.17	-2.68639	-1.12805	-1.05083
MH09g0459800	52.52	1.13	0.61	1.14	-5.53847	-6.42791	-5.52576
MH09g0464400	8.45	44.36	26.55	26.46	2.39224	1.65169	1.64679
MH09g0471200	106.09	1.22	9.21	3.69	-6.44226	-3.52594	-4.84552
MH10g0016700	41.13	18.6	9.86	12.71	-1.14489	-2.06053	-1.69423
MH10g0025800	178.04	1.05	20.44	9.57	-7.40567	-3.12273	-4.21754
MH10g0025900	178.66	1.91	21.97	8.03	-6.5475	-3.02361	-4.47567
MH10g0028900	4.39	16.25	17.07	20.03	1.88815	1.95917	2.18987
MH10g0042100	1.28	14.62	9.79	6.04	3.51373	2.93517	2.2384
MH10g0065500	1.95	5.39	8.86	7.7	1.46681	2.18383	1.98138
MH10g0070500	6.05	16.97	18.32	40.99	1.48798	1.59841	2.76026
MH10g0148100	46.07	8.65	17.72	5.67	-2.41306	-1.37845	-3.02241
MH10g0230300	4.49	11.86	12.36	12.27	1.40132	1.46089	1.45035
MH10g0252000	167.68	64.66	60.84	77.21	-1.37477	-1.46262	-1.11885
MH10g0253500	6.08	52.63	12.87	22.91	3.11374	1.08187	1.91383
MH10g0258100	477	12.57	234.04	122.19	-5.24593	-1.02723	-1.96486
MH10g0266100	33.47	11.44	10.15	7.96	-1.54878	-1.72139	-2.07203
MH10g0286900	1.62	100.78	8.75	8.51	5.95907	2.43329	2.39317
MH10g0293700	17.24	53.36	56.23	46.93	1.63	1.70558	1.44475
MH10g0311600	0.26	10.25	6.48	8.08	5.30097	4.63941	4.95777
MH10g0313400	29.34	73.36	160.63	197.91	1.32212	2.4528	2.7539
MH10g0331000	0.52	6.88	4.17	4.75	3.72583	3.00346	3.19134
MH10g0334800	0.33	5.64	2.99	3.88	4.09516	3.17961	3.55552
MH10g0334900	15.99	49.86	61	62.08	1.64071	1.93164	1.95696
MH10g0355300	6.11	0.45	2.73	1.2	-3.76318	-1.16227	-2.34814
MH10g0362300	0.2	3.05	5.36	11.38	3.93074	4.74416	5.83036
MH10g0373600	3.12	43.21	22.2	58.85	3.79175	2.83094	4.23742
MH10g0384200	1.47	8.29	15.34	110.82	2.49556	3.38341	6.23626
MH10g0390700	6.88	17.32	15.3	18.34	1.33196	1.15305	1.41451
MH10g0393500	1.02	94.38	28.08	60.01	6.53184	4.7829	5.87856
MH10g0394600	4.64	28.93	26.99	42.77	2.64037	2.54023	3.2044
MH10g0400300	1.68	80.33	27.48	52.56	5.57941	4.03185	4.96743
MH10g0401600	7.3	1.41	32.53	55.49	-2.3722	2.1558	2.92626
MH10g0405200	72.76	208.86	216.66	497.96	1.52132	1.57422	2.77481
MH10g0431100	8.94	3.01	1.4	1.96	-1.57051	-2.67485	-2.18942
MH10g0431200	77.65	34.62	21.04	10.19	-1.16538	-1.88385	-2.92983
MH10g0437200	14.67	0	0.83	0	-17.1625	-4.14361	-17.1625
MH10g0444100	1.17	23.86	5	4.93	4.35001	2.09542	2.07508
MH10g0445200	45.33	0.48	2.33	1.21	-6.56129	-4.28206	-5.22739
MH11g0022900	6.41	122.67	52.7	164.1	4.25831	3.03941	4.67811
MH11g0041800	4.71	20.41	12.11	19.18	2.11548	1.3624	2.0258
MH11g0047500	1.84	23.52	23.09	51.64	3.67611	3.64949	4.81071
MH11g0049900	0.38	3.87	4.44	9.78	3.34826	3.54649	4.68576
MH11g0068800	2030.36	246.81	610	597.86	-3.04026	-1.73485	-1.76386
MH11g0083000	18.28	186.57	153.97	291.17	3.35138	3.07431	3.99352
MH11g0112200	11.64	37.76	26.09	37.51	1.69777	1.16441	1.68818
MH11g0112300	29.73	1.76	8.21	2.66	-4.07827	-1.85647	-3.48242
MH11g0137100	6.64	1.95	2.34	2.63	-1.76771	-1.50467	-1.33612
MH11g0168500	489.6	207.96	241.73	208.92	-1.2353	-1.01821	-1.22865
MH11g0194000	9.94	2.31	3.97	2.76	-2.10535	-1.32411	-1.84858
MH11g0342500	22.28	4.43	4.19	3.36	-2.33037	-2.41073	-2.72922
MH11g0373700	81.81	11.95	28.37	18.38	-2.77527	-1.52791	-2.15414
MH11g0392300	50.51	192.3	148.22	126.57	1.92872	1.5531	1.32529
MH11g0417300	3.16	51.85	16.03	24.23	4.03635	2.34278	2.9388
MH11g0420800	5.93	24.01	13.73	27.55	2.01753	1.21123	2.21595
MH11g0439300	18.06	0	6.53	2.93	-17.4624	-1.46764	-2.62383
MH11g0484300	8.85	0.38	1.24	1.16	-4.54161	-2.83534	-2.93155
MH11g0498600	12.27	46.17	30.61	35.49	1.91182	1.31887	1.53228
MH11g0524200	76.85	23.53	31.26	21.39	-1.70754	-1.29773	-1.84511
MH11g0537600	118.62	23.1	57.65	41.47	-2.36038	-1.04095	-1.51621
MH11g0567400	3.28	25.39	30.21	51.76	2.95249	3.20326	3.98007
MH11g0569000	6.33	21.11	19.82	27.57	1.73765	1.64668	2.12282
MH11g0572600	0.85	5.12	7.41	13.98	2.59061	3.12394	4.03976
MH11g0574600	4.28	10.69	14.85	24.55	1.32058	1.79478	2.52004
MH11g0577800	6.9	54.06	27.02	50.58	2.96989	1.96936	2.8739
MH11g0649700	6.6	0.54	136.09	259.35	-3.61143	4.36595	5.29629
MH11g0652800	2.55	6.51	8.25	9.98	1.35216	1.6939	1.96854
MH11g0661700	69.22	33.57	32.72	27.54	-1.04402	-1.08102	-1.32966
MH12g0013700	13.7	39.84	65.91	111.79	1.54004	2.26632	3.02854
MH12g0020500	11.63	70.65	36.04	88.33	2.60284	1.63175	2.92505
MH12g0041100	28.45	8.77	2.66	4.91	-1.69778	-3.41893	-2.53463
MH12g0051700	15.42	41.78	37.05	42.62	1.43801	1.26467	1.46673
MH12g0060200	14.8	68.32	79.73	85.33	2.20671	2.42953	2.52746
MH12g0061700	2.61	10.36	13.61	13.59	1.9889	2.38255	2.38042
MH12g0067600	42.23	145.15	86.83	166.97	1.7812	1.03993	1.98325
MH12g0102300	28.19	125.6	69.3	147.03	2.15558	1.29767	2.38286
MH12g0110700	2.44	5.86	6.61	10	1.26402	1.43777	2.03505
MH12g0137600	0	2.67	1.96	2.81	14.7046	14.2586	14.7783
MH12g0342800	16.1	287.06	33.62	44.86	4.15622	1.06226	1.47837
MH12g0344600	35.13	0	0	0	-18.4223	-18.4223	-18.4223
MH12g0365700	16.81	33.87	37.69	40.6	1.01069	1.16486	1.27216
MH12g0366800	21.28	141.66	59.49	85.95	2.73486	1.48315	2.014
MH12g0374000	82.29	300.43	204.18	210.84	1.86824	1.31105	1.35736
MH12g0374100	97.63	289.3	254.3	220.87	1.56717	1.38114	1.1778
MH12g0399500	60.79	186.95	126.46	160.73	1.62075	1.05678	1.40273
MH12g0406500	4.81	17.74	18.07	20.78	1.8829	1.90949	2.11109
MH12g0416600	14.95	675.26	66.01	807.74	5.49723	2.14254	5.75567
MH12g0436500	0.28	4.42	3.91	13.41	3.98055	3.80367	5.58174
MH12g0456000	3.82	26.58	16.76	27.39	2.7987	2.13338	2.842
MH12g0456300	6501.17	15010.3	16278.1	14154	1.20718	1.32416	1.12244
MH12g0457000	11.71	86.34	39.42	54.96	2.88229	1.75119	2.23064
MH12g0462400	1.93	12.74	7.8	10.73	2.72269	2.01487	2.47498
