# Supplementary material for: Transcriptomic and proteomic profiles of II YOU 838 (Oryza sativa) provide insights into heat stress tolerance in hybrid rice
Source: PeerJ. 2020 Feb 21;8:e8306. doi: 10.7717/peerj.8306 (PMC7039125; doi:10.7717/peerj.8306)
Supplement: Supplemental Information 8 [file peerj-08-8306-s008.xls]

## Sheet: GO enrichment analysis
Table S5: Gene ontology (GO) enrichment analysis of the differentially expressed genes in hybrid rice II8 flag leaves at different durations of heat stress classified into clusters by k-means clustering analysis.
GO enrichment analysis of DEGs	GO term	Ontology	Description	DEGs genes number in input list	All genes number in background/reference (25577)	p-value	FDR
The continuous up-regulation DEGs (618)	GO:0009605	P	response to external stimulus	41	420	4.1e-13	2.8e-11
	GO:0050896	P	response to stimulus	152	3812	3.5e-10	9.4e-09
	GO:0006950	P	response to stress	115	2610	4.1e-10	9.4e-09
	GO:0007154	P	cell communication	31	442	3.7e-07	6.4e-06
	GO:0051704	P	multi-organism process	46	852	8.5e-07	1.2e-05
	GO:0009607	P	response to biotic stimulus	34	693	0.00014	0.0016
	GO:0005975	P	carbohydrate metabolic process	61	1632	0.00067	0.0066
	GO:0008152	P	metabolic process	364	13597	0.0026	0.022
	GO:0009719	P	response to endogenous stimulus	31	745	0.0033	0.025
	GO:0003824	F	catalytic activity	352	11258	1.2e-10	2.9e-09
	GO:0016740	F	transferase activity	130	4039	0.0004	0.0048
	GO:0000166	F	nucleotide binding	137	4522	0.0029	0.017
	GO:0005215	F	transporter activity	51	1394	0.0028	0.017
	GO:0016301	F	kinase activity	62	1818	0.0048	0.023
	GO:0030246	F	carbohydrate binding	18	373	0.0057	0.023
	GO:0016772	F	transferase activity, transferring phosphorus-containing groups	70	2189	0.011	0.039
	GO:0004872	F	receptor activity	7	102	0.015	0.045
	GO:0012505	C	endomembrane system	22	299	9.1e-06	0.00036
	GO:0005773	C	vacuole	32	621	9.2e-05	0.0009
	GO:0005618	C	cell wall	30	558	7.5e-05	0.0009
	GO:0005886	C	plasma membrane	73	1895	8.2e-05	0.0009
	GO:0005576	C	extracellular region	30	586	0.00017	0.0013
	GO:0030312	C	external encapsulating structure	30	593	0.00021	0.0013
	GO:0044444	C	cytoplasmic part	141	4554	0.0011	0.006
	GO:0005777	C	peroxisome	10	157	0.0065	0.028
	GO:0042579	C	microbody	10	157	0.0065	0.028
	GO:0005737	C	cytoplasm	147	5063	0.0091	0.035
The early up-regulation DEGs (597)	GO:0009628	P	response to abiotic stimulus	74	1340	2.4e-11	1.1e-09
	GO:0009605	P	response to external stimulus	37	420	3.4e-11	1.1e-09
	GO:0007154	P	cell communication	37	442	1.3e-10	2.8e-09
	GO:0050896	P	response to stimulus	144	3812	3.7e-09	5.9e-08
	GO:0009719	P	response to endogenous stimulus	45	745	2.2e-08	2.8e-07
	GO:0006950	P	response to stress	97	2610	4.7e-06	5e-05
	GO:0051704	P	multi-organism process	36	852	0.00069	0.0063
	GO:0060255	P	regulation of macromolecule metabolic process	76	2315	0.002	0.016
	GO:0010468	P	regulation of gene expression	73	2226	0.0025	0.016
	GO:0009607	P	response to biotic stimulus	29	693	0.0025	0.016
	GO:0019222	P	regulation of metabolic process	77	2489	0.0078	0.045
	GO:0003700	F	transcription factor activity, sequence-specific DNA binding	48	879	1.3e-07	2.9e-06
	GO:0012505	C	endomembrane system	26	299	3.7e-08	1.5e-06
The early down-regulation DEGs (94)	GO:0007154	P	cell communication	9	442	4.2e-05	0.0015
	GO:0050896	P	response to stimulus	28	3812	0.00019	0.0034
	GO:0009628	P	response to abiotic stimulus	12	1340	0.0038	0.047
	GO:0005215	F	transporter activity	12	1394	0.0052	0.047
	GO:0005576	C	extracellular region	8	586	0.0015	0.026
The continuous down-regulation DEGs (250)	GO:0007154	P	cell communication	26	442	8.8e-13	4.7e-11
	GO:0050896	P	response to stimulus	63	3812	1.6e-05	0.00044
	GO:0009605	P	response to external stimulus	15	420	2.5e-05	0.00044
	GO:0009719	P	response to endogenous stimulus	20	745	6.1e-05	0.00081
	GO:0007165	P	signal transduction	21	847	0.00012	0.0013
	GO:0050794	P	regulation of cellular process	51	3296	0.00062	0.0055
	GO:0050789	P	regulation of biological process	54	3639	0.0011	0.0076
	GO:0010468	P	regulation of gene expression	37	2226	0.0011	0.0076
	GO:0019222	P	regulation of metabolic process	40	2489	0.0013	0.0078
	GO:0015979	P	photosynthesis	9	273	0.0018	0.0095
	GO:0065007	P	biological regulation	59	4205	0.0023	0.0095
	GO:0060255	P	regulation of macromolecule metabolic process	37	2315	0.0022	0.0095
	GO:0051704	P	multi-organism process	18	852	0.0022	0.0095
	GO:0009607	P	response to biotic stimulus	14	693	0.0094	0.035
	GO:0006464	P	cellular protein modification process	37	2580	0.012	0.043
	GO:0043231	C	intracellular membrane-bounded organelle	86	5819	2e-05	0.00027
	GO:0043227	C	membrane-bounded organelle	86	5826	2.1e-05	0.00027
	GO:0009536	C	plastid	37	1843	3e-05	0.00027
	GO:0043229	C	intracellular organelle	89	6310	8.2e-05	0.00045
	GO:0043226	C	organelle	89	6313	8.3e-05	0.00045
	GO:0005622	C	intracellular	99	7560	0.00047	0.0021
	GO:0044424	C	intracellular part	94	7341	0.0016	0.006
	GO:0044444	C	cytoplasmic part	60	4554	0.0085	0.029
	GO:0012505	C	endomembrane system	8	299	0.01	0.031
	GO:0005737	C	cytoplasm	64	5063	0.016	0.042
