# Supplementary material for: Transcriptomic and proteomic profiles of II YOU 838 (Oryza sativa) provide insights into heat stress tolerance in hybrid rice
Source: PeerJ. 2020 Feb 21;8:e8306. doi: 10.7717/peerj.8306 (PMC7039125; doi:10.7717/peerj.8306)
Supplement: Supplemental Information 10 [file peerj-08-8306-s010.xls]

## Sheet: coexpression network DEGs
Table S7: The differentially expressed genes in the 117 nodes of the heat tolerance co-regulatory network of hybrid rice and its parents under long-term heat stress.
Node Gene ID	Log2 (Fold_change)									TPM
	Fu Hui 838 24h/0h	Fu Hui 838 72h/0h	Fu Hui 838 120h/0h	II-32A 24h/0h	II-32A 72h/0h	II-32A 120h/0h	II YOU 838 24h/0h	II YOU 838 72h/0h	II YOU 838 120h/0h	Fu HUI 838-0h	Fu HUI 838-24h	Fu HUI 838-72h	Fu HUI 838-120h	II-32A-0h	II-32A-24h	II-32A-72h	II-32A-120h	II YOU 838-0h	II YOU 838-24h	II YOU 838-72h	II YOU 838-120h
MH01g0016100	-0.947062	-0.561574	-0.513157	-1.62294	-2.3842	-2.12017	-2.27481	-0.595707	-1.61074	160	82.99	108.41	112.11	405.27	131.58	77.63	93.22	338.27	69.9	223.84	110.76
MH01g0123900	0.516184	1.37105	-0.313891	2.14427	2.66087	2.64823	18.209	13.8037	16.3786	1.79	2.56	4.63	1.44	1.45	6.41	9.17	9.09	0.0001	30.3	1.43	8.52
MH01g0461100	1.85074	-0.710206	1.43152	2.50732	0.970609	1.0288	-4.11159	1.29032	0.938624	13.71	49.45	8.38	36.98	25.29	143.79	49.56	51.6	25.93	1.5	63.42	49.7
MH01g0492100	0.347539	1.03457	1.24679	0.162553	-0.229026	0.749485	-15.1115	1.28226	2.00407	2.68	3.41	5.49	6.36	4.36	4.88	3.72	7.33	3.54	0.0001	8.61	14.2
MH01g0522000	1.62172	2.22652	2.40258	4.01945	5.36284	4.69194	3.32761	1.05145	1.60812	18.47	56.84	86.44	97.66	4.65	75.41	191.35	120.19	25.34	254.4	52.52	77.25
MH01g0523600	-2.03304	-2.66484	-0.886343	0.949374	1.20451	0.601451	3.19417	0.697301	0.358943	12.81	3.13	2.02	6.93	1.74	3.36	4.01	2.64	1.77	16.2	2.87	2.27
MH01g0540500	14.9339	15.1984	14.6662	1.88011	3.19187	4.37324	5.76571	2.28226	3.40507	0.0001	3.13	3.76	2.6	1.16	4.27	10.6	24.04	0.59	32.1	2.87	6.25
MH01g0546600	15.1713	15.5834	12.5018	12.5746	14.2949	13.5142	16.9083	13.0701	14.0532	0.0001	3.69	4.91	0.58	0.0001	0.61	2.01	1.17	0.0001	12.3	0.86	1.7
MH01g0562000	0	0	0	0	0	0	0	0	0	0.0001	0.0001	0.0001	0.0001	0.0001	0.0001	0.0001	0.0001	0.0001	0.0001	0.0001	0.0001
MH01g0602700	0.439051	-0.232767	-1.01881	0.168279	-0.210542	-1.29775	-2.75845	-0.992911	-2.19864	16.98	23.02	14.45	8.38	16.57	18.62	14.32	6.74	18.27	2.7	9.18	3.98
MH01g0624600	12.4767	0	13.0868	14.7471	0	12.5265	-14.1115	-1.63472	-14.1115	0.0001	0.57	0.0001	0.87	0.0001	2.75	0.0001	0.59	1.77	0.0001	0.57	0.0001
MH01g0684800	13.0532	16.7458	14.0785	0	13.8037	17.1615	16.9431	15.0701	16.5597	0.0001	0.85	10.99	1.73	0.0001	0.0001	1.43	14.66	0.0001	12.6	3.44	9.66
MH01g0704800	13.7936	16.3547	13.8138	3.16161	2.56828	2.47294	16.7207	0	15.7936	0.0001	1.42	8.38	1.44	0.58	5.19	3.44	3.22	0.0001	10.8	0.0001	5.68
MH01g0760400	2.92283	5.05528	4.77873	0.261852	1.69525	1.95956	2.02425	3.76841	4.11454	0.6	4.55	19.95	16.47	4.07	4.88	13.18	15.83	0.59	2.4	8.04	10.22
MH01g0784300	0.567685	0.861672	0.208785	-1.33911	-1.20086	0.187643	-1.79209	2.48093	1.59516	14	20.75	25.44	16.18	22.39	8.85	9.74	25.5	19.74	5.7	110.2	59.64
MH01g0791000	15.0575	14.9567	13.8138	-13.0868	2.48483	5.1855	15.0102	16.5746	17.426	0.0001	3.41	3.18	1.44	0.87	0.0001	4.87	31.66	0.0001	3.3	9.76	17.61
MH01g0791100	12.4767	13.0868	15.5834	0	14.9431	16.1033	13.8727	14.4893	16.4252	0.0001	0.57	0.87	4.91	0.0001	0.0001	3.15	7.04	0.0001	1.5	2.3	8.8
MH02g0011800	1.12423	0.471022	-0.265112	0.0707528	-0.911191	0.39776	15.9431	13.8037	14.6439	4.17	9.09	5.78	3.47	3.78	3.97	2.01	4.98	0.0001	6.3	1.43	2.56
MH02g0058800	1.52427	1.83715	1.69919	15.2769	16.2382	16.3752	15.7207	15.2949	15.1713	0.89	2.56	3.18	2.89	0.0001	3.97	7.73	8.5	0.0001	5.4	4.02	3.69
MH02g0060200	13.4767	12.5018	0	0	0	0	0	0	0	0.0001	1.14	0.58	0.0001	0.0001	0.0001	0.0001	0.0001	0.0001	0.0001	0.0001	0.0001
MH02g0090700	-0.429465	-0.407878	-1.62315	0.750828	1.24636	3.62422	2.59193	0.400114	-0.27637	2.68	1.99	2.02	0.87	1.45	2.44	3.44	17.88	4.13	24.9	5.45	3.41
MH02g0472300	0	0	12.5018	1.94937	0.402547	2.95366	13.8727	0	0	0.0001	0.0001	0.0001	0.58	0.87	3.36	1.15	6.74	0.0001	1.5	0.0001	0.0001
MH02g0492900	1.05499	0.12448	0.350952	1.26978	1.17259	1.80513	1.92459	1.53257	2.24292	21.75	45.19	23.71	27.74	34.31	82.73	77.34	119.9	9.72	36.9	28.12	46.01
MH02g0493300	0	12.5018	0	13.1674	0	0	17.7796	0	0	0.0001	0.0001	0.58	0.0001	0.0001	0.92	0.0001	0.0001	0.0001	22.5	0.0001	0.0001
MH02g0508400	1.16871	-0.306449	0.723182	2.09564	1.32361	1.86019	4.73819	1.47383	2.05172	25.03	56.27	20.24	41.32	29.07	124.25	72.76	105.54	5.89	157.2	16.36	24.42
MH02g0617000	-0.772423	-0.683592	-0.26767	-1.8389	-1.27141	-1.06604	-2.8351	-0.459871	-0.520871	425.77	249.26	265.09	353.67	529.7	148.07	219.43	253	742.85	104.1	540.09	517.73
MH02g0624500	12.4767	0	0	12.5746	0	13.5142	0	0	0	0.0001	0.57	0.0001	0.0001	0.0001	0.61	0.0001	1.17	0.0001	0.0001	0.0001	0.0001
MH02g0644700	0.514741	-0.78701	-0.281471	0.690635	0.275597	0.922683	0.598118	-0.288255	-0.295948	68.83	98.34	39.89	56.63	50.88	82.12	61.59	96.45	66.59	100.8	54.53	54.24
MH02g0661300	0	14.3021	0	14.5746	12.4767	14.6883	17.4087	0	0	0.0001	0.0001	2.02	0.0001	0.0001	2.44	0.57	2.64	0.0001	17.4	0.0001	0.0001
MH02g0689800	2.14215	2.10308	1.79206	3.53953	3.50919	2.34454	3.73057	0.607483	1.0947	10.43	46.04	44.81	36.12	7.85	91.28	89.38	39.87	6.78	90	10.33	14.48
MH02g0690400	1.29264	1.60552	2.35469	2.71135	3.02075	3.25735	3.71541	1.98978	3.2552	2.09	5.12	6.36	10.69	2.33	15.26	18.91	22.28	3.54	46.5	14.06	33.8
MH03g0018700	1.03365	-0.62849	0.152104	1.62834	1.45841	1.63713	3.43568	2.10524	1.88593	28.6	58.55	18.5	31.78	20.64	63.81	56.72	64.2	7.07	76.5	30.42	26.13
MH03g0040500	0	0	0	0	0	0	0	0	0	0.0001	0.0001	0.0001	0.0001	0.0001	0.0001	0.0001	0.0001	0.0001	0.0001	0.0001	0.0001
MH03g0055100	2.69671	3.09371	3.05928	0.796409	1.61767	1.50115	5.02425	2.60319	5.3115	1.49	9.66	12.72	12.42	7.56	13.13	23.2	21.4	1.18	38.4	7.17	46.86
MH03g0131500	0.516184	2.12536	0.174396	4.07374	4.96698	3.75304	4.15016	-0.773408	-13.8435	1.79	2.56	7.81	2.02	0.87	14.65	27.21	11.73	1.47	26.1	0.86	0.0001
MH03g0141500	15.4736	13.8238	15.3056	16.968	16.0701	14.1033	8.6949	0.543622	1.94391	0.0001	4.55	1.45	4.05	0.0001	12.82	6.88	1.76	0.59	244.5	0.86	2.27
MH03g0171000	0.595016	-0.626931	0.278089	3.12009	2.32077	3.37707	6.83116	1.19162	1.54057	7.15	10.8	4.63	8.67	12.5	108.68	62.45	129.87	0.88	100.2	2.01	2.56
MH03g0173600	-0.955228	-0.890256	-0.410557	-0.21266	-0.765163	-1.3153	-0.00485266	0.286103	0.0532008	465.1	239.88	250.93	349.91	469.81	405.42	276.43	188.79	223.35	222.6	272.34	231.74
MH03g0175000	-1.61718	0.168225	-0.00638644	-1.554	-1.26152	-1.73861	-4.75578	0.111295	-0.0278573	11.32	3.69	12.72	11.27	32.27	10.99	13.46	9.67	16.21	0.6	17.51	15.9
MH03g0221800	0.875653	-0.200184	0.43955	-0.375697	-0.505391	-0.28774	-0.571098	1.51026	1.21849	112.92	207.19	98.29	153.14	122.39	94.33	86.22	100.26	70.42	47.4	200.6	163.87
MH03g0358500	-12.5507	1.27302	-12.5507	0	12.4767	14.1033	18.8995	0	14.0532	0.6	0.0001	1.45	0.0001	0.0001	0.0001	0.57	1.76	0.0001	48.9	0.0001	1.7
MH03g0541600	0.846673	1.50946	1.31037	-1.32069	-1.30347	-1.28429	-0.866221	1.02636	0.311652	36.35	65.37	103.49	90.15	145.65	58.31	59.01	59.8	64.53	35.4	131.44	80.09
MH03g0618300	2.32677	2.28011	1.41807	0.617667	1.60015	2.8349	0.814968	1.59089	2.41837	1.19	5.97	5.78	3.18	3.78	5.8	11.46	26.97	3.24	5.7	9.76	17.32
MH03g0646800	0	0	0	0	0	0	0	15.9454	15.9316	0.0001	0.0001	0.0001	0.0001	0.0001	0.0001	0.0001	0.0001	0.0001	0.0001	6.31	6.25
MH03g0721000	0.541081	0.09603	-0.604794	2.39362	1.98	1.97685	2.41445	1.02884	0.554341	17.58	25.58	18.79	11.56	5.81	30.53	22.92	22.87	6.19	33	12.63	9.09
MH03g0734800	1.12358	0.897986	0.354354	0.519327	0.735355	1.39528	2.73892	3.30598	2.73687	26.22	57.13	48.86	33.52	21.51	30.83	35.81	56.58	7.37	49.2	72.89	49.13
MH03g0749700	0	0	12.5018	0.0727563	1.30189	3.2255	16.977	14.0701	15.1713	0.0001	0.0001	0.0001	0.58	1.16	1.22	2.86	10.85	0.0001	12.9	1.72	3.69
MH04g0406400	-0.367406	-1.72191	-0.606818	-2.02824	-2.94247	-3.21678	-6.33151	-0.640818	-2.82478	28.6	22.17	8.67	18.78	57.27	14.04	7.45	6.16	48.32	0.6	30.99	6.82
MH04g0414100	0	13.0868	13.8138	12.5746	12.4767	12.5265	1.60921	1.27723	2.53098	0.0001	0.0001	0.87	1.44	0.0001	0.61	0.57	0.59	0.59	1.8	1.43	3.41
MH04g0462000	13.7936	13.5018	13.5018	13.9012	15.0701	14.8386	15.6382	13.0701	12.4767	0.0001	1.42	1.16	1.16	0.0001	1.53	3.44	2.93	0.0001	5.1	0.86	0.57
MH04g0544100	2.16131	1.72313	2.05025	2.64331	1.98159	1.53133	3.76939	2.56825	2.3587	38.44	171.95	126.91	159.21	34.89	217.98	137.79	100.85	16.5	225	97.86	84.63
MH04g0544800	0.494132	1.25126	0.830724	2.60686	3.30093	3.30495	2.15659	2.26699	2.92535	12.51	17.62	29.78	22.25	4.36	26.56	42.97	43.09	4.71	21	22.67	35.78
MH04g0552400	1.78083	-13.863	0.632581	17.1605	16.9106	18.1757	18.2232	0	0	1.49	5.12	0.0001	2.31	0.0001	14.65	12.32	29.61	0.0001	30.6	0.0001	0.0001
MH04g0556600	0.310262	2.38909	1.27769	0.965839	1.48069	0.796091	0.928014	1.05224	4.01508	5.96	7.39	31.22	14.45	10.47	20.45	29.22	18.18	6.78	12.9	14.06	109.62
MH04g0590800	1.67401	1.96306	-0.0327899	0.0727563	0.568284	0.601451	16.8361	14.2949	15.5597	0.89	2.84	3.47	0.87	0.58	0.61	0.86	0.88	0.0001	11.7	2.01	4.83
MH04g0666500	-0.747653	-0.337276	1.0037	-0.633094	-0.639101	-0.790469	-0.742221	0.908604	0.969359	286.33	170.53	226.64	574.13	671.86	433.21	431.41	388.44	280.52	167.7	526.6	549.25
MH04g0705600	-0.971815	-1.98932	-1.10065	1.79641	1.13646	1.86612	-0.142958	3.56118	3.08201	39.03	19.9	9.83	18.2	3.78	13.13	8.31	13.78	2.65	2.4	31.28	22.44
MH05g0368900	13.4767	14.0785	14.0785	14.1596	13.0701	14.8386	16.68	14.2949	14.7936	0.0001	1.14	1.73	1.73	0.0001	1.83	0.86	2.93	0.0001	10.5	2.01	2.84
MH05g0399700	-0.485427	-1.03684	-13.5387	12.5746	13.4893	12.5265	19.8315	13.4893	0	1.19	0.85	0.58	0.0001	0.0001	0.61	1.15	0.59	0.0001	93.3	1.15	0.0001
MH05g0427800	14.4704	15.7445	14.8188	2.53434	3.93643	3.60145	16.8727	13.4893	14.2805	0.0001	2.27	5.49	2.89	0.58	3.36	8.88	7.04	0.0001	12	1.15	1.99
MH05g0430900	1.30643	0.404537	0.197318	0.887078	1.53939	1.8476	2.69871	1.21039	0.531613	6.55	16.2	8.67	7.51	6.11	11.3	17.76	21.99	7.07	45.9	16.36	10.22
MH05g0463200	-12.5507	2.75489	0.536053	14.7471	15.2913	14.1033	14.7207	14.6551	16.472	0.6	0.0001	4.05	0.87	0.0001	2.75	4.01	1.76	0.0001	2.7	2.58	9.09
MH05g0501600	0.850785	0.930149	0.371316	4.36639	4.50039	4.9329	5.15625	1.74781	2.70837	8.04	14.5	15.32	10.4	2.62	54.04	59.3	80.03	2.65	94.5	8.9	17.32
MH06g0010500	-0.102971	-0.607375	0.405111	-0.119401	-0.76871	-0.936359	-0.852728	0.22686	-0.0705708	1533.54	1427.9	1006.6	2030.7	2705.77	2490.85	1588.13	1413.9	1550.52	858.58	1814.55	1476.5
MH06g0016000	-0.967313	-1.44283	-0.592252	-1.03988	-1.65921	-1.56758	-3.62415	-0.759227	-1.23898	1709.33	874.25	628.77	1133.81	1799.58	875.26	569.77	607.13	2511.71	203.7	1483.95	1064.14
MH06g0023400	1.37532	0.545975	0.91819	1.33933	1.25915	1.14496	3.33696	0.730302	0.873755	63.76	165.41	93.09	120.49	73.84	186.84	176.74	163.29	23.87	241.2	39.6	43.74
MH06g0046100	-0.493145	0.172012	0.364133	-0.842767	-1.22655	-1.00237	-1.54302	0.350003	-0.337441	244.02	173.37	274.92	314.08	469.23	261.63	200.52	234.23	342.69	117.6	436.78	271.22
MH06g0146900	12.4767	12.5018	13.0868	3.16161	1.56828	1.8215	17.0102	12.4767	12.4767	0.0001	0.57	0.58	0.87	0.58	5.19	1.72	2.05	0.0001	13.2	0.57	0.57
MH06g0493000	0	0	0	-13.8238	-13.8238	-13.8238	0	12.4767	15.7207	0.0001	0.0001	0.0001	0.0001	1.45	0.0001	0.0001	0.0001	0.0001	0.0001	0.57	5.4
MH06g0689400	2.25898	1.96306	1.96306	1.55818	1.56828	2.55141	18.1357	13.4893	15.1713	0.89	4.26	3.47	3.47	1.45	4.27	4.3	8.5	0.0001	28.8	1.15	3.69
MH07g0035000	0	15.1984	14.6662	0	12.4767	15.6883	1.02425	1.96285	3.2671	0.0001	0.0001	3.76	2.6	0.0001	0.0001	0.57	5.28	0.59	1.2	2.3	5.68
MH07g0047900	0	0	0	0	0	0	0	0	0	0.0001	0.0001	0.0001	0.0001	0.0001	0.0001	0.0001	0.0001	0.0001	0.0001	0.0001	0.0001
MH07g0049200	0.741807	-13.5387	1.76696	1.23942	-0.287212	-0.987652	-14.1115	0.183446	0.682142	1.19	1.99	0.0001	4.05	3.49	8.24	2.86	1.76	1.77	0.0001	2.01	2.84
MH07g0083000	1.30558	1.08725	-0.0235169	3.32713	1.70254	3.35652	1.74752	0.27621	-0.739173	40.82	100.9	86.73	40.16	5.81	58.31	18.91	59.51	10.9	36.6	13.2	6.53
MH07g0105000	0.523035	3.35073	1.95693	15.6634	16.3426	18.3378	4.89872	1.18345	3.53028	1.19	1.71	12.14	4.62	0.0001	5.19	8.31	33.13	1.77	52.8	4.02	20.45
MH07g0124300	-0.527707	-0.399849	0.482203	-1.19503	-1.16912	-0.781351	-1.36506	0.843713	-0.139146	320	221.97	242.54	447	328.52	143.49	146.09	191.14	198.6	77.1	356.42	180.34
MH07g0223700	-0.167506	0.0491785	0.507617	-0.0600428	-0.869475	0.871626	-1.47268	-1.53681	-2.4895	8.94	7.96	9.25	12.71	23.55	22.59	12.89	43.09	19.15	6.9	6.6	3.41
MH07g0285200	0.82579	-0.8489	0.0827951	-0.169535	-1.05632	-0.162155	-1.54217	0.300502	-0.499105	1598.5	2833.35	887.5	1692.92	1528.63	1359.15	735.05	1366.12	1122.67	385.49	1382.65	794.34
MH07g0326300	-2.27808	-1.43564	-1.66107	-1.65987	-1.61858	-2.10082	-1.76059	-1.55977	-0.656169	81.34	16.77	30.07	25.72	169.78	53.73	55.29	39.58	131.13	38.7	44.48	83.21
MH07g0384600	-0.766565	-0.769266	-0.147257	-0.200851	-0.795722	-1.63356	-0.742407	0.255173	-0.227063	1319.02	775.34	773.89	1191.03	1320.76	1149.11	760.83	425.67	713.67	426.59	851.75	609.74
MH07g0421500	-0.947615	-1.15441	-0.330355	-1.07633	-0.806852	-1.06923	-2.08621	-0.455342	-1.08281	1361.63	705.99	611.71	1082.96	1162.61	551.35	664.58	554.07	1115.89	262.79	813.86	526.82
MH07g0428300	-13.5387	1.12755	-0.451874	0.487794	1.85626	1.43357	5.5941	1.54362	-12.5265	1.19	0.0001	2.6	0.87	0.87	1.22	3.15	2.35	0.59	28.5	1.72	0.0001
MH07g0501100	0	13.8238	13.0868	13.1674	13.8037	14.3233	3.80501	-13.1033	-0.626542	0.0001	0.0001	1.45	0.87	0.0001	0.92	1.43	2.05	0.88	12.3	0.0001	0.57
MH07g0505300	2.52698	1.46608	2.60611	2.39235	1.8576	2.56928	4.13048	1.09338	1.12607	21.45	123.63	59.26	130.6	58.73	308.34	212.84	348.57	20.04	350.99	42.76	43.74
MH07g0519600	-0.470786	-1.07145	-0.288566	-1.68458	-1.98947	-1.47294	-3.27845	-0.8923	-2.06065	451.39	325.71	214.79	369.56	729.14	226.83	183.62	262.67	745.2	76.8	401.48	178.63
MH07g0520900	0.711313	-0.0513938	0.0526246	1.14526	1.1654	1.45737	0.0386908	0.0546323	-0.105133	55.72	91.23	53.77	57.79	27.33	60.45	61.3	75.05	66.59	68.4	69.16	61.91
MH08g0023600	0.517869	-0.40733	0.194358	0.849331	0.270745	0.578645	-1.68128	0.0555082	-0.576173	1018.69	1458.6	768.11	1165.6	820.13	1477.6	989.43	1224.82	1208.41	376.79	1255.81	810.53
MH08g0419700	1.24286	3.70229	1.75132	15.4831	18.4029	18.8395	3.48718	2.15585	2.94831	0.6	1.42	7.81	2.02	0.0001	4.58	34.66	46.91	2.06	23.1	9.18	15.9
MH08g0432200	0.254929	0.53981	-13.5387	0	12.4767	16.5173	4.3818	3.48368	0.950247	1.19	1.42	1.73	0.0001	0.0001	0.0001	0.57	9.38	0.59	12.3	6.6	1.14
MH08g0491200	0	0	0	13.1674	0	0	12.5507	0	0	0.0001	0.0001	0.0001	0.0001	0.0001	0.92	0.0001	0.0001	0.0001	0.6	0.0001	0.0001
MH08g0522800	0	0	0	0	0	0	0	0	0	0.0001	0.0001	0.0001	0.0001	0.0001	0.0001	0.0001	0.0001	0.0001	0.0001	0.0001	0.0001
MH09g0219800	0.603202	-1.5036	-0.693573	0.719892	0.866733	2.62793	1.16175	0.726166	0.432053	6.55	9.95	2.31	4.05	2.04	3.36	3.72	12.61	2.95	6.6	4.88	3.98
MH09g0309700	0.5025	-12.5507	-0.0489096	0	0	0	17.1655	14.6551	15.1713	0.6	0.85	0.0001	0.58	0.0001	0.0001	0.0001	0.0001	0.0001	14.7	2.58	3.69
MH09g0315000	12.4767	12.5018	12.5018	16.0992	15.5716	17.472	15.5507	13.4893	14.7936	0.0001	0.57	0.58	0.58	0.0001	7.02	4.87	18.18	0.0001	4.8	1.15	2.84
MH09g0361900	0.892464	-0.891164	-0.307866	0.416164	-2.48904	-0.445411	-3.71809	-3.52064	-5.11402	5.36	9.95	2.89	4.33	3.2	4.27	0.57	2.35	19.74	1.5	1.72	0.57
MH09g0366800	0.516184	1.41403	0.177962	2.55987	2.98248	4.01546	3.4864	1.11506	1.53323	3.58	5.12	9.54	4.05	1.45	8.55	11.46	23.45	2.65	29.7	5.74	7.67
MH09g0368500	-0.322318	1.24957	-0.0918609	1.1585	2.14944	2.90751	3.16721	2.18345	3.29062	9.24	7.39	21.97	8.67	4.65	10.38	20.63	34.89	1.77	15.9	8.04	17.32
MH09g0391200	-0.811332	-1.55266	-0.7436	-0.082107	-0.952008	-0.963222	-0.817818	0.824106	0.695633	435.9	248.4	148.59	260.34	437.25	413.06	226.02	224.27	435.22	246.9	770.53	704.88
MH09g0431200	-1.30797	-0.606501	-0.954593	-2.33711	-1.95888	0.547563	-2.84599	-1.59948	-1.69847	106.96	43.2	70.25	55.19	20.06	3.97	5.16	29.32	107.85	15	35.59	33.23
MH09g0436500	0	0	0	0	0	0	0	0	0	0.0001	0.0001	0.0001	0.0001	0.0001	0.0001	0.0001	0.0001	0.0001	0.0001	0.0001	0.0001
MH10g0137100	-1.65093	-14.1277	-1.04087	0.657719	1.30189	0.0123837	12.5507	13.4893	15.0575	1.79	0.57	0.0001	0.87	1.16	1.83	2.86	1.17	0.0001	0.6	1.15	3.41
MH10g0172900	13.7936	13.8238	0	0	0	0	15.7207	12.4767	0	0.0001	1.42	1.45	0.0001	0.0001	0.0001	0.0001	0.0001	0.0001	5.4	0.57	0.0001
MH10g0253500	0.924148	1.64844	0.643061	1.56409	1.99287	2.14269	4.53946	0.902012	1.81091	28.31	53.72	88.75	44.21	29.94	88.53	119.17	132.21	17.97	417.89	33.58	63.05
MH10g0328900	0.986146	-0.270722	0.573935	1.55595	1.324	0.88171	5.01881	0.913115	1.78574	42.9	84.98	35.56	63.86	63.96	188.06	160.13	117.85	13.26	429.89	24.97	45.72
MH10g0371700	-1.05839	-1.03392	-0.937387	0.375702	0.466184	-0.70568	3.62232	0.344314	1.15067	42.61	20.46	20.81	22.25	29.65	38.47	40.96	18.18	9.72	119.7	12.34	21.58
MH10g0392800	0	13.0868	0	-13.0868	1.98332	4.98542	17.1053	14.0701	16.4252	0.0001	0.0001	0.87	0.0001	0.87	0.0001	3.44	27.56	0.0001	14.1	1.72	8.8
MH10g0393500	12.4767	15.0826	15.5834	-1.66669	2.56496	3.98126	5.59721	4.47057	6.36831	0.0001	0.57	3.47	4.91	5.81	1.83	34.38	91.76	0.88	42.6	19.51	72.7
MH10g0393800	0.903785	0.870572	0.0619434	1.28263	1.56301	2.01123	5.29103	2.54502	2.68214	7.75	14.5	14.17	8.09	6.4	15.57	18.91	25.8	1.77	69.3	10.33	11.36
MH10g0394600	-1.6567	-1.62315	-14.7099	1.07276	1.56828	2.51706	2.6681	2.71541	4.19284	2.68	0.85	0.87	0.0001	0.87	1.83	2.58	4.98	1.18	7.5	7.75	21.58
MH10g0419200	0.75056	1.07755	0.995725	1.90311	2.45299	3.20102	0.914122	0.76105	3.50405	5.07	8.53	10.7	10.11	2.04	7.63	11.17	18.76	7.96	15	13.49	90.31
MH10g0429500	1.57054	1.9169	1.10884	6.04364	5.71913	5.13118	20.0506	15.9454	15.9316	2.68	7.96	10.12	5.78	0.87	57.39	45.83	30.49	0.0001	108.6	6.31	6.25
MH11g0022900	1.93929	-0.246087	0.476076	1.00824	1.71531	3.4925	2.06716	2.19235	3.93314	13.71	52.58	11.56	19.07	3.49	7.02	11.46	39.28	7.66	32.1	35.01	117.01
MH11g0071000	0	0	0	0	0	0	0	0	0	0.0001	0.0001	0.0001	0.0001	0.0001	0.0001	0.0001	0.0001	0.0001	0.0001	0.0001	0.0001
MH11g0112300	0	0	0	0	12.4767	12.5265	0	0	0	0.0001	0.0001	0.0001	0.0001	0.0001	0.0001	0.57	0.59	0.0001	0.0001	0.0001	0.0001
MH12g0038200	0	12.5018	13.8138	-0.512206	1.56828	1.75181	15.4576	13.0701	15.863	0.0001	0.0001	0.58	1.44	0.87	0.61	2.58	2.93	0.0001	4.5	0.86	5.96
MH12g0101700	0	12.5018	12.5018	0	0	14.1033	0	14.9476	19.4431	0.0001	0.0001	0.58	0.58	0.0001	0.0001	0.0001	1.76	0.0001	0.0001	3.16	71.28
MH12g0101800	0.0396205	-0.666578	0.401453	-0.711623	-1.48895	-1.14455	-3.7621	0.529911	0.132254	211.54	217.43	133.27	279.41	898.92	548.91	320.26	406.61	850.69	62.7	1228.26	932.36
