# Supplementary material for: Transcriptomic and proteomic profiles of II YOU 838 (Oryza sativa) provide insights into heat stress tolerance in hybrid rice
Source: PeerJ. 2020 Feb 21;8:e8306. doi: 10.7717/peerj.8306 (PMC7039125; doi:10.7717/peerj.8306)
Supplement: Supplemental Information 11 [file peerj-08-8306-s011.xls]

## Sheet: 35 proteins 
Table S8: Details of the 35 unique differentially abundant proteins detected in the flag leaves of hybrid rice II YOU 838 after 24 h of heat stress.
Spot No.a	Quantitative changeb		Accession No.		Functional annotation	Scorec	Coverage (%)d	pI	Fold change	FPKM
	0 h	24 h								0 h	24 h	72 h	120 h
Response to stimulus
7	0.1932	0.0517	gi|125540074	MH02g0458600	Protein FLUORESCENT IN BLUE LIGHT, chloroplastic	35.67	1.88	9.63	3.74*	12.07	9.18	10.29	12.49
9	0.4991	0.2411	gi|115470529	MH07g0043700	Oxygen-evolving enhancer protein 2, chloroplastic	3036.54	58.43	8.77	2.07*	3370.37	1158.36	3136.95	1967.32
11	0.3589	0.1064	gi|77556936	MH12g0410900	Probable disease resistance protein,leucine Rich Repeat family	38.06	1.28	6.18	3.37	36.44	69.26	46.52	46.7
16	0.1401	0.0517	gi|125556938	MH07g0011600	Glutamate receptor 3.4	295.08	1.32	8.32	2.71	7.69	12.18	13.64	14.63
17	0.2418	0.0315	gi|1443061827	MH02g0063200	SNF1-related protein kinase regulatory subunit gamma-like PV42a	41.75	2.13	5.48	7.68
18	0.1559	0.0602	gi|937932501	MH09g0219800	Phosphoenolpyruvate carboxylase 2	34.13	1.23	6.14	2.59	9.68	20.49	11.37	8.76
21	0.1039	0.2304	gi|115448989	MH02g0644700	Heat shock 70 kDa protein, mitochondrial	722.91	40.59	5.25	+2.22*	104.59	328.05	110	132.07
25	1.317	0.1579	gi|297728699	MH11g0587400	Putative disease resistance protein RGA1	40.93	0.63	6.78	8.34	1.62	7.38	6.46	5.71
27	2.2173	1.0423	gi|115461066	MH04g0666500	chloroplastic Glutamine synthetase	902.38	32.87	6.27	2.13*	607.89	176.59	1174.46	793.1
45	0.1576	0.0575	gi|1002305653	MH11g0166300	Serpin-Z2B	26.7	13.74	8.97	2.74
53	0.0662	0.1345	gi|115477393	MH08g0522800	70 kDa peptidyl-prolyl isomerase Large rice FK506 binding protein gene rFKBP64	38.06	25.38	5.31	+2.03*	24.04	550.25	59.75	68.56
Oxidation-reduction
24	2.432	1.195	gi|115450493	MH03g0040500	Glyceraldehyde-3-phosphate dehydrogenase GAPB, chloroplastic	5772.91	60.22	6.67	2.04*	1200.7	292.52	1381.7	941.78
52	0.0611	0.1285	gi|51090904	MH06g0582000	Glycine dehydrogenase [decarboxylating], mitochondrial	39.3	13.17	6.2	+2.1	1367.05	364.14	1157.96	814.68
54	0.2161	0.0901	gi|115477208	MH08g0509600	Probable lipoxygenase 8, chloroplastic	60.18	1.27	7.01	2.4	44.64	166.25	127.59	208.16
56	2.138	0.4212	gi|218200182	MH07g0519600	Ferredoxin-dependent glutamate synthase, chloroplastic	186.37	4.08	6.83	5.08*	678.7	134.92	404.29	208.28
Photosynthesis
1	0.5342	0.1573	gi|115472727	MH07g0421500	Cytochrome b6-f complex iron-sulfur subunit, chloroplastic	127.17	15.93	8.38	3.40*	2795.03	656.38	2404.04	1455.6
2	0.1512	0.3138	gi|115470052	MH06g0706000	ATP-dependent zinc metalloprotease FTSH 1, chloroplastic	1235.47	40.32	5.38	+2.08*	420.08	494.31	433.76	434.8
6	0.0513	0.1611	gi|297723955	MH05g0279300	Putative pentatricopeptide repeat-containing protein (PPR), mitochondrial	30.55	0.77	7.53	+3.14	2.81	2.1	2.38	2.94
12	0.4301	0.1331	gi|115471157	MH07g0124300	Chloroplast stem-loop binding protein of 41 kDa, chloroplastic	135.5	42.86	7.81	3.23*	246.57	113.27	393.99	226.6
15	0.061	0.1574	gi|115482382	MH10g0328900	Chaperonin CPN60-2, mitochondrial	127.26	45.12	5.87	+2.58*	26.35	421.37	42.57	58.61
26	0.8637	0.2498	gi|115484401	MH11g0071000	Fructose-bisphosphate aldolase, chloroplastic	3612.96	50.9	6.79	3.46*	2185.67	1657.93	3679.58	3177.7
42	0.1451	0.0476	gi|115465942	MH06g0016000	Ferredoxin--NADP reductase chloroplast precursor, leaf isozyme	248.33	23.69	8.75	3.05*	1880.1	208.72	1444.02	906.33
Metabolic process
4	0.1508	0.0701	gi|115444319	MH02g0060200	Tyrosine-sulfated glycopeptide receptor 1	34.8	1.64	6.16	2.15	0.57	0.54	0.29	0.55
5	0.5319	0.2131	gi|1443059738	MH02g0406900	Probable leucine-rich repeat receptor-like protein kinase	34.46	1.52	8.73	2.5
10	0.2017	0.0752	gi|1002260661	MH04g0024800	L-type lectin-domain containing receptor kinase IV.2	170.47	7.03	9.25	2.68
20	0.0414	0.0851	gi|108706603	MH03g0091100	Calmodulin-binding transcription activator 2	112.08	1.16	9.69	+2.06	41.13	29.83	30.23	31.01
40	0.4061	0.0543	gi|125564057	MH09g0379400	Transcription factor bHLH96	50.3	15.62	6.51	7.48*	0.33	0	0	0
50	0.1601	0.0738	gi|669031896	MH10g0280100	40S ribosomal protein S28	15.6	16.67	11.72	2.17*	50.39	36.38	44.2	46.37
55	0.2561	0.1221	gi|28190676	MH06g0046100	Transketolase, chloroplastic	2337.02	29.44	6.55	2.10*	920.3	162.32	987.76	665.84
3	0.1895	0.0385	gi|222618645	MH01g0411700	MORC family CW-type zinc finger protein 3	35.58	1.46	7.37	4.92	24.18	33.1	24.47	31.07
13	0.2735	0.1123	gi|218197310	MH05g0540900	Ketol-acid reductoisomerase, chloroplastic	326.78	14.51	6.39	2.44*	667.79	578.21	667.2	523.52
19	0.1676	0.0538	gi|62733190	MH11g0317300	putative reverse transcriptase	59.87	4.82	9.29	3.12	0	0.46	0	0.23
33	0.2413	0.1092	gi|215708742	MH04g0636300	Aminomethyltransferase, mitochondrial	46.9	14.91	8.46	2.21*	527.26	56.17	430.62	224.85
38	0.6119	0.3032	gi|117380773	MH01g0759700	ubiquitin-like specific protease 1 (Ulp1)	26.8	28.24	5.48	2.02	0	0	1.86	0
57	2.142	0.4431	gi|218200191	MH07g0520900	Chromodomain-helicase-DNA-binding protein 1	33.51	0.7	9.37	4.83	44.82	70.44	45.07	40.77
a Spot numbers correspond to the protein spot numbers in Fig. S2.
b Data is the average vol% of a deﬁned spot in gels.
c Database search was based on MASCOT (p < 0.05).
d The coverage of the matched peptides in relation to the full-length sequence.
“+” Proteins that showed increased abundance after 24 h of heat stress.
* The 18 proteins that showed the same abundance patterns (increased or decreased) as the corresponding gene expression levels (up- or down-regulated).
